# Supplementary material for: Investigating genetic overlap of multidimensional pain and suicidal behaviors in >2 million individuals
Source: Research Square preprint supplement (doi:10.21203/rs.3.rs-9217629/v1), 2026-06-02
Supplement: Supplementary file 1 [file d6f6991f10a53de663680c72.pdf]

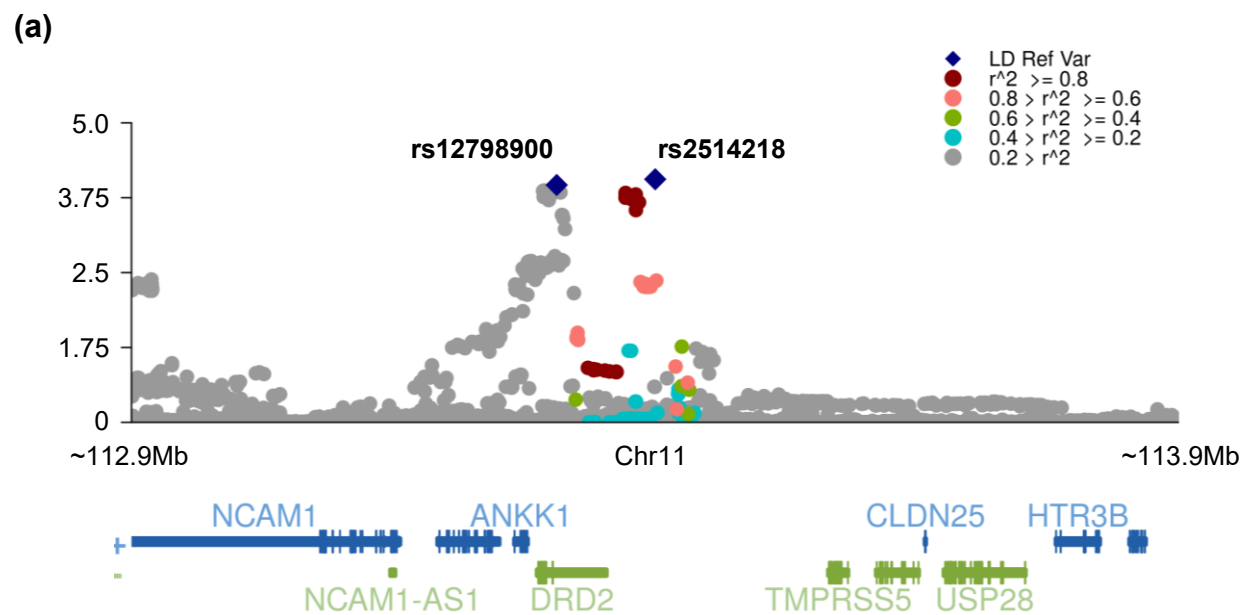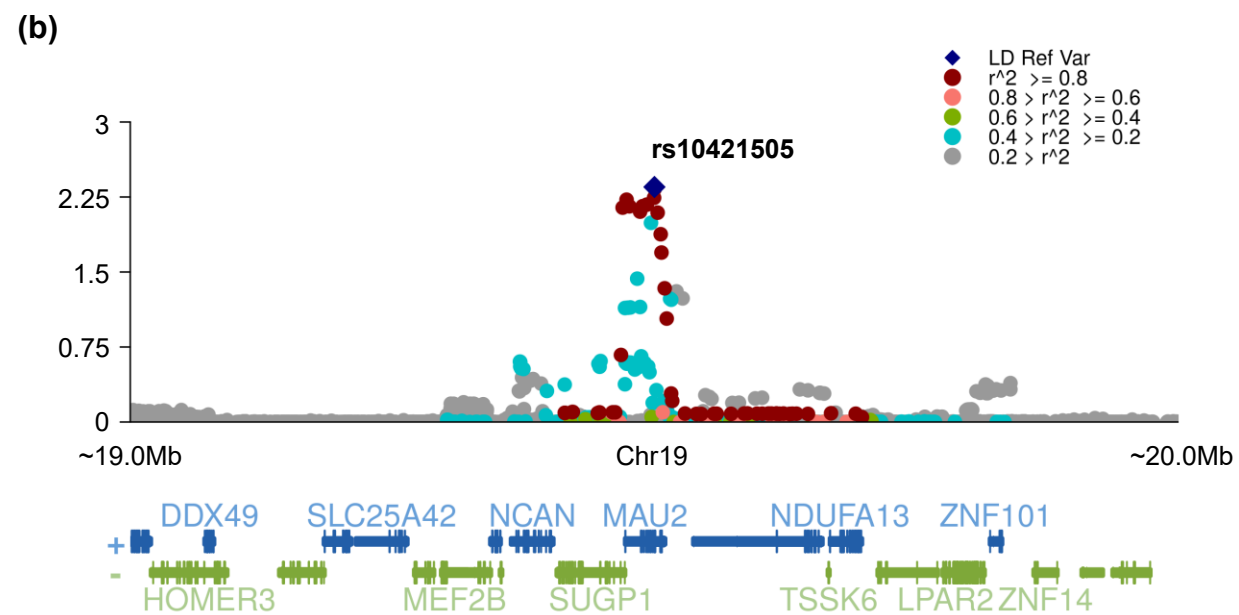

**Supplementary Figure 1.** Regional association plots of the most significant shared genomic regions, highlighting lead SNPs rs2514218 and rs12798900 for suicide attempt (a), and rs10421505 for suicide death (b), in analyses with multidimensional pain. The x-axis shows genomic position and y-axis indicates  $-\log_{10}(\text{conjFDR})$ .
