# Supplementary material for: Investigating genetic overlap of multidimensional pain and suicidal behaviors in >2 million individuals
Source: Research Square preprint supplement (doi:10.21203/rs.3.rs-9217629/v1), 2026-06-02
Supplement: Supplementary file 1 [file f9bc229a706326e5b655cd5b.xlsx]

## Sheet: Table S1
Supplementary Table 1. LAVA analysis between multidimensional pain and suicide attempt
Loucs id	CHR	START	STOP	MP h2 p	SA h2 p	rho	LAVA p	FDR
1	1	10539	1376204	2.18081e-11	0.00216858	-0.742052	0.00027428	0.0409737
2	1	36855140	38474036	1.91142e-19	1.21342e-05	0.559424	0.000145476	0.0369023
3	1	65894185	66778015	1.48675e-06	1.94894e-10	0.52854	0.00198125	0.082286
4	1	171044256	172465153	0.0073645	6.07969e-08	-0.755224	0.00157468	0.0766869
5	2	5568654	6306606	1.614e-12	6.75357e-05	0.579793	0.000878048	0.0675986
6	2	7108209	7966709	1.04511e-10	0.0173338	0.909986	0.00014373	0.0369023
7	2	44104111	45189468	2.19219e-10	0.0143469	0.748192	0.00149244	0.0766869
8	2	59251997	60775066	5.16666e-36	1.20003e-05	0.565743	1.81124e-05	0.0170906
9	2	86867033	88547312	0.000183492	2.26247e-17	-0.528733	0.00156972	0.0766869
10	2	130485399	131760638	4.98894e-06	1.06871e-05	-0.664036	0.000882311	0.0675986
11	2	206821200	207726594	3.11895e-10	1.97564e-16	0.41804	0.00202758	0.082286
12	2	208674589	209940230	2.90553e-13	0.000216123	0.540741	0.00245445	0.0902126
13	2	219678784	220771552	5.89912e-22	2.48394e-09	0.471943	0.000170493	0.0369023
14	3	795747	1440048	8.70994e-06	1.38809e-08	0.567028	0.00150096	0.0766869
15	3	56954879	58557718	1.3345e-10	0.00442452	0.658934	0.00237482	0.0889644
16	3	87411259	88375763	0.001037	0.0240812	1	0.000836745	0.0675986
17	4	149998529	151014322	0.000331061	0.00292051	-0.885054	0.00133189	0.0766869
18	5	30416067	31679464	2.97203e-33	0.0494438	0.766955	0.00031752	0.0409737
19	5	145319097	147180171	2.91131e-13	2.74165e-05	0.516099	0.0016893	0.0768726
20	6	1380680	2746531	2.87986e-09	0.0262455	-0.820516	0.000995993	0.0692927
21	6	36346354	37570051	8.632e-15	0.000206968	0.643747	0.000156208	0.0369023
22	6	92953799	93696825	1.83783e-11	2.78601e-08	0.486248	0.00200754	0.082286
23	6	93696826	95176337	1.1235e-27	0.0238262	0.644276	0.00156778	0.0766869
24	6	164687463	165835953	9.95298e-17	3.69007e-05	0.489662	0.00219132	0.0853738
25	7	7167611	7926500	4.88129e-09	3.59181e-05	-0.615101	0.000826254	0.0675986
26	7	10481678	11232447	3.90126e-09	0.0103614	0.761105	0.00169688	0.0768726
27	7	25671576	27351286	1.77317e-07	0.0118296	-0.85997	0.000527543	0.0513827
28	7	113339387	115321301	1.40616e-37	1.65665e-10	0.463826	2.63203e-05	0.0170906
29	7	136113468	137657459	7.40801e-08	8.53352e-05	-0.577553	0.00276847	0.0962531
30	9	8262304	9170120	3.32039e-07	1.04056e-06	-0.567024	0.00142173	0.0766869
31	9	9920259	10675474	1.80856e-09	0.0207699	-0.820323	0.00090224	0.0675986
32	9	14244748	14902924	6.35901e-08	2.55355e-06	0.528971	0.0025729	0.092815
33	9	109150718	110630150	2.89963e-14	1.04635e-05	0.579657	0.000222556	0.0409737
34	9	121008530	122677719	2.95969e-48	0.000106028	0.48892	0.000253019	0.0409737
35	9	125137579	126092931	5.64338e-14	0.00352866	-0.651271	0.00138918	0.0766869
36	10	98005995	99367800	7.21378e-13	0.0103918	0.711587	0.000985796	0.0692927
37	11	39329141	40362940	3.05538e-07	0.00593129	0.747906	0.00190851	0.082286
38	11	62800369	64594822	4.51953e-09	0.00344973	-0.750962	0.000553975	0.0513878
39	11	68000950	68887344	1.90872e-09	9.58104e-05	-0.702139	0.000234505	0.0409737
40	11	107846825	109891837	4.60713e-08	0.000905084	-0.66328	0.00156347	0.0766869
41	11	112755447	113889019	3.74347e-31	4.08095e-09	0.393632	0.0011065	0.0743263
42	12	48960266	50344346	3.51404e-15	0.00253405	-0.60374	0.00169504	0.0768726
43	12	123396635	124843768	1.0556e-18	3.05012e-05	0.479279	0.00223772	0.0854721
44	13	34722392	35744568	0.000202752	0.000191862	-0.974121	5.07943e-05	0.0247368
45	13	36579414	37499810	1.42203e-07	2.50552e-06	-0.636557	0.000476666	0.0488708
46	13	58245844	59751795	1.12084e-28	0.0393901	0.715867	0.00130581	0.0766869
47	15	96864279	98025684	1.22057e-11	2.90349e-05	0.539781	0.00131059	0.0766869
48	16	27443062	29043177	7.48965e-13	8.47727e-30	0.418953	0.000111927	0.0369023
49	17	11778165	12676353	8.39408e-06	6.42631e-12	-0.575859	0.00046509	0.0488708
50	17	13648447	14508610	5.95029e-08	0.00145309	0.756744	0.000374359	0.0428971
51	18	25305261	26861067	3.18836e-15	8.42225e-12	0.464411	0.00033654	0.0409737
52	18	52512524	53762996	4.46693e-39	0.00114038	0.484429	0.00201654	0.082286
53	18	58527237	59449422	3.10979e-05	2.60288e-05	-0.632954	0.00290427	0.0975434
54	19	38472871	39370419	2.71377e-05	1.23472e-05	0.624418	0.00281644	0.0962531
55	20	42185672	43008890	4.95957e-18	0.00117526	-0.5326	0.00279847	0.0962531
56	20	44072211	45673603	3.77791e-08	0.0400522	0.837082	0.00211713	0.0841667
57	21	40480832	41344742	3.06454e-07	0.000128002	-0.909977	7.99113e-06	0.0155667
58	21	46045434	47014880	2.44212e-12	0.0213937	-0.829756	0.000328532	0.0409737
Locus ids in bold indicate FDR < 0.05.

## Sheet: Table S2
Supplementary Table 2. LAVA analysis between multidimensional pain and suicide death
Loucs id	CHR	START	STOP	MP h2 p	SA h2 p	rho	LAVA p	FDR
1	1	96147577	97721186	1.55854e-20	4.69941e-05	0.653798	3.57964e-05	0.0145757
2	1	158900370	159882515	1.47939e-08	5.97523e-05	0.774616	6.64602e-05	0.0156511
3	1	189904638	191419275	4.56788e-12	0.00135254	0.654276	0.00130366	0.0881592
4	1	208162952	209711169	2.73598e-14	0.00523581	0.737325	0.00022026	0.0266114
5	1	230227248	231287764	5.81689e-05	0.00859038	0.900745	0.000953913	0.0801638
6	2	36867390	37603360	6.4442e-08	0.00305198	0.728288	0.00153077	0.0924724
7	2	57952946	59251996	7.33093e-33	2.36388e-07	0.54661	1.9591e-05	0.0130182
8	2	169224446	170155561	2.51368e-13	0.0030926	-0.670851	0.000926542	0.0801638
9	2	198140351	199654969	9.58711e-06	0.00103014	-0.807918	0.000846662	0.0801638
10	3	172004761	173415591	1.02013e-08	3.24084e-08	-0.607921	0.000180975	0.0240516
11	5	73314062	74245354	9.58918e-06	0.0108093	-0.860854	0.0013267	0.0881592
12	6	10416551	11790671	5.51267e-10	0.000132651	-0.595368	0.00122694	0.0881592
13	6	22199714	23192337	7.14267e-15	0.000296112	0.729737	4.38697e-05	0.0145757
14	6	23192338	23939306	5.03527e-11	0.001007	0.793059	7.43813e-05	0.0156511
15	6	143083348	144791455	1.83823e-07	7.79816e-05	0.62209	0.00141919	0.0898145
16	7	137657460	138755107	2.28601e-10	4.70364e-07	-0.50077	0.00175438	0.099546
17	9	2441121	3079045	2.10184e-05	0.0426962	-1	0.000965102	0.0801638
18	9	97418634	98885862	3.62971e-06	0.00666503	0.850102	0.000861186	0.0801638
19	10	67769823	68623274	1.16189e-12	0.0147759	0.890906	0.000155126	0.0240516
20	11	123398883	124403477	7.52914e-12	0.00118817	0.919909	5.27457e-06	0.0070099
21	13	41003944	42037054	6.24481e-12	0.00325572	0.658819	0.00179767	0.099546
22	15	69089816	70767983	3.39814e-15	2.74644e-05	0.629534	8.24364e-05	0.0156511
23	16	76635468	77270665	6.53001e-07	0.0127087	-0.859489	0.00130897	0.0881592
24	22	48977539	49559207	3.70756e-08	0.000172362	0.743989	0.000167035	0.0240516
Locus ids in bold indicate FDR < 0.05.

## Sheet: Table S3
Supplementary Table 3. Lead SNPs of shared genetic loci between multidimensional pain and suicide attempt
Genomic locia	CHR	Min-Max BPb	Indexc	BPd	A1	A2	conjFDR	Novel in MPe	Novel in SAf	Concodant effectg	Functionality	minChrState	RDBh	CADDi	LAVA Locj	NearestGene
1	1	66399895-66547212	rs2310819	66440096	T	C	0.0116102	Yes	x	+	intronic	9	6	3.026	3 (LAVA FDR < 0.1)	PDE4B
1	1	66625369-66625369	rs72679121	66625369	A	G	0.0481058	Yes	Yes	+	intronic	5	7	2.473	3 (LAVA FDR < 0.1)	PDE4B
2	1	69688082-69688082	rs10889802	69688082	T	C	0.0349829	Yes	Yes	+	ncRNA_intronic	5	7	6.362	x	ENSG00000235446 (LINC02791); ENSG00000223883 (LINC01707)
3	1	73652197-73942894	rs4650206	73720577	T	C	0.0381941	Yes	Yes	-	intergenic	9	6	1.031	x	RP4-598G3.1
4	1	96823803-96970844	rs6593601	96946401	A	C	0.0322362	Yes	Yes	+	intergenic	5	6	0.109	x	EEF1A1P11
4	1	97115049-97279692	rs7554256	97167384	A	G	0.00784513	Yes	Yes	+/-	intergenic	5	6	1.151	x	RN7SKP270
5	1	98298371-98562260	rs75641275	98327133	A	C	0.00788878	x	Yes	-/+	intronic	5	6	2.075	x	DPYD
6	1	146882556-146883384	rs10399871	146883384	T	C	0.0417246	Yes	Yes	+	ncRNA_intronic	9	6	8.389	x	ENSG00000278811 (LINC00624)
7	2	20412197-20415566	rs3771239	20412735	T	C	0.0420212	Yes	Yes	-	intronic	2	NA	1.566	x	SDC1
8	2	23234798-23241596	rs41476545	23239369	T	C	0.0468071	Yes	Yes	+	ncRNA_intronic	5	NA	5.88	x	ENSG00000232451
9	2	27151842-27345484	rs7589627	27159786	T	C	0.0207887	x	Yes	+	intronic	4	5	0.159	x	DPYSL5
10	2	60136176-60173540	rs1544850	60167206	T	C	0.027554	Yes	Yes	+	ncRNA_intronic	5	NA	1.153	8	RP11-444A22.1
11	2	60523559-60528052	rs2419903	60528052	T	C	0.0394323	x	Yes	-	intergenic	5	6	2.329	8	AC007381.3
12	2	100111374-100111374	rs4851210	100111374	T	C	0.0458537	Yes	Yes	+	intergenic	5	7	0.792	x	REV1
12	2	100265936-100265936	rs17782474	100265936	A	G	0.0416018	Yes	Yes	-	intronic	4	5	17.51	x	AFF3
13	2	144159751-144263280	rs10048736	144239303	A	G	0.0119606	x	Yes	-	ncRNA_intronic	2	5	0.425	x	ARHGAP15; RP11-570L15.2
14	2	207849378-207893783	rs72961179	207874584	T	C	0.0176843	Yes	Yes	-	ncRNA_intronic	5	6	13.93	x	ENSG00000299281
15	2	220035118-220045035	rs7577690	220045035	A	G	0.0312907	Yes	Yes	+	intronic	3	7	2.479	13	FAM134A
16	2	241739217-241739217	rs3755539	241739217	A	G	0.0428945	Yes	Yes	+	intronic	4	NA	4.257	x	KIF1A
17	3	49431903-49836707	rs11716948	49431903	T	C	0.0355598	x	Yes	+/-	intronic	4	7	2.496	x	RHOA
17	3	49210732-49890967	rs184219667	49813936	A	C	0.00134877	x	Yes	+	intronic	4	6	4.734	x	IP6K1
18	3	56088978-56425451	rs12637784	56318675	A	C	0.0161424	Yes	Yes	-	intronic	5	7	6.986	x	ERC2
19	3	117528682-117719538	rs62264957	117532595	A	C	0.0316468	Yes	Yes	+	ncRNA_intronic	5	6	0.393	x	LSAMP; RP11-384F7.2
20	4	28380212-28424680	rs1024120	28400119	T	C	0.0180246	x	Yes	-	intronic	5	7	1.843	x	RP11-180C1.1
21	4	62813643-62813643	rs12650391	62813643	T	C	0.0499003	Yes	Yes	+	intronic	5	6	1.041	x	LPHN3
21	4	62996462-62996462	rs2193122	62996462	A	G	0.0418612	Yes	Yes	+	ncRNA_intronic	1	NA	5.467	x	RP11-84A1.3
22	5	78532658-78570219	rs2607144	78556798	A	C	0.0395502	Yes	Yes	-	intronic	5	NA	0.227	x	JMY
23	5	88000636-88015545	rs254781	88000636	T	C	0.0366963	Yes	Yes	+/-	ncRNA_intronic	5	NA	0.081	x	CTC-467M3.1
24	5	120174466-120174466	rs12522598	120174466	A	G	0.0486525	x	Yes	-	ncRNA_intronic	9	7	2.352	x	ENSG00000306263
25	5	155846974-155856538	rs1504929	155852065	T	G	0.0439833	Yes	Yes	-	intronic	5	7	5.207	x	SGCD
26	6	19216889-19313381	rs9368050	19226575	T	C	0.0191484	Yes	x	+	intergenic	15	7	1.057	x	RP11-686D16.1
27	6	129360123-129410736	rs9402103	129410195	A	G	0.0275142	Yes	Yes	+	intronic	5	7	1.379	x	LAMA2
28	6	152201201-152264529	rs3757323	152202007	T	C	0.00301656	x	Yes	+	intronic	4	6	6.872	x	ESR1
29	6	156447210-156464044	rs59903549	156448341	T	C	0.0206166	Yes	Yes	+	ncRNA_intronic	5	7	0.81	x	ENSG00000307615; ENSG00000287092
30	6	161688959-161688959	rs34799296	161688959	T	C	0.045432	Yes	Yes	-	intronic	4	6	0.385	x	AGPAT4
31	7	1132153-1132153	rs3808352	1132153	A	G	0.0364776	Yes	Yes	-/+	exonic	4	5	0.143	x	C7orf50; GPER1
32	7	113757643-113771051	rs76086831	113771051	A	G	0.018926	Yes	Yes	+	intronic	5	5	16.62	28	FOXP2
33	7	114940147-115112776	rs6968125	114940147	T	C	0.000935842	x	x	-	ncRNA_intronic	5	3a	21.4	28	ENSG00000298119
34	7	153522077-153527150	rs12671608	153524115	T	C	0.0174587	Yes	Yes	-	intronic	9	6	7.234	x	ENSG00000130226 (DPP6)
35	7	157501018-157501018	rs9638110	157501018	T	C	0.0362427	Yes	Yes	+	intronic	5	4	2.142	x	PTPRN2
36	8	10691489-10696620	rs11996727	10691489	T	C	0.0388306	Yes	Yes	-	intronic	4	6	7.775	x	SOX7; SOX7; PINX1
36	8	10929725-10929725	rs4840536	10929725	A	G	0.0467166	x	Yes	+	intronic	5	5	11.4	x	XKR6
37	8	76611126-76690384	rs78954405	76670015	A	G	0.0337883	Yes	Yes	-	intergenic	5	7	7.997	x	AC016194.1
38	8	114650771-114707007	rs28825376	114703651	A	C	0.0483502	Yes	Yes	+	intergenic	7	6	0.078	x	RP11-67H2.1
39	8	115400419-115727826	rs6994458	115727826	T	C	0.0453344	Yes	Yes	-	intergenic	5	6	3.912	x	RP11-192P9.1
40	9	14061949-14068545	rs543458	14068327	A	C	0.0115324	Yes	Yes	+	upstream	5	7	4.918	x	RP11-280O24.1
41	9	109175575-109175575	rs17290816	109175575	A	G	0.0273775	Yes	Yes	-	ncRNA_intronic	5	7	0.872	33	RP11-308N19.1
42	9	122659596-122673299	rs10118916	122672140	A	C	0.0406901	x	Yes	-	ncRNA_intronic	9	6	2.657	34	ENSG00000297691
43	9	127797945-127986487	rs10986604	127933747	T	C	0.00840163	x	Yes	-	intronic	4	6	0.846	x	PPP6C
44	11	28643913-28643913	rs10835372	28643913	T	C	0.0498762	Yes	Yes	+	intergenic	1	5	2.716	x	RP11-960D24.1
45	11	29788938-29788938	rs11030804	29788938	T	C	0.0298697	Yes	Yes	-	ncRNA_intronic	15	7	2.438	x	CTD-3138F19.1
46	11	112827715-112912811	rs7105462	112912048	A	G	0.00412232	x	Yes	-	intronic	5	7	1.862	41 (LAVA FDR < 0.1)	NCAM1
47	11	113266679-113270828	rs7118900	113266821	A	G	0.00703612	x	Yes	+	exonic	4	7	7.399	41 (LAVA FDR < 0.1)	ANKK1
47	11	113218050-113315355	rs12798900	113298996	T	G	0.000109137	x	x	-	intronic	5	5	2.482	41 (LAVA FDR < 0.1)	DRD2
47	11	113317973-113394035	rs2514218	113392994	T	C	8.80454e-05	x	x	-	intergenic	5	6	6.355	41 (LAVA FDR < 0.1)	DRD2
48	12	24210719-24224544	rs11047241	24210719	T	C	0.0226791	Yes	Yes	-	ncRNA_intronic	5	6	0.673	x	ENSG00000305357; ENSG00000134532 (SOX5)
49	12	83871007-83878615	rs10779007	83878615	T	C	0.0405247	Yes	Yes	+/-	intergenic	9	7	3.789	x	RP11-384P14.1
50	13	96932868-97029792	rs7337506	96936978	A	G	0.0241943	Yes	Yes	+	intronic	7	6	0.87	x	HS6ST3
51	14	42051747-42051747	rs11157240	42051747	A	G	0.0454851	Yes	Yes	+	ncRNA_intronic	5	6	0.004	x	ENSG00000258636 (LRFN5-DT)
52	15	47675569-47685378	rs962949	47685378	A	G	0.00531755	Yes	Yes	-	ncRNA_intronic	5	7	0.211	x	SEMA6D; CTD-2050N2.1
52	15	47717163-47764845	rs72733826	47717163	A	G	0.0294621	Yes	Yes	+	intronic	5	7	2.319	x	SEMA6D
53	15	91426560-91426560	rs4702	91426560	A	G	0.0148028	Yes	Yes	-	UTR3	2	5	17.36	x	FURIN
54	16	30057148-30068354	rs9939774	30068354	T	C	0.0459395	Yes	Yes	+/-	intronic	4	6	12.11	x	ALDOA
55	16	54216420-54216420	rs56342456	54216420	T	C	0.0492276	Yes	Yes	-	intergenic	7	7	8.763	x	RP11-324D17.2
56	16	89144907-89144907	rs12934766	89144907	T	C	0.01787	Yes	Yes	+	intergenic	5	5	1.81	x	ACSF3
57	17	65825248-66097292	rs56305452	65990500	A	C	0.0161302	x	Yes	-	ncRNA_intronic	1	4	6.957	x	RP11-855A2.5
58	18	12979220-13116432	rs8097125	13005473	T	C	0.0221918	Yes	Yes	-	intronic	4	1f	1.836	x	CEP192
59	18	50517509-50552965	rs62097903	50531232	A	G	0.0447071	x	Yes	-	intronic	9	5	3.822	x	DCC
59	18	50559986-51055069	rs7231178	50753741	A	G	0.00436452	x	Yes	+	intronic	14	7	1.505	x	DCC
59	18	50803976-50807202	rs72925321	50807202	A	G	0.00977672	Yes	Yes	-	intronic	9	7	0.899	x	DCC
60	18	53210302-53397199	rs613872	53210302	T	G	0.0250758	x	Yes	+	intronic	5	5	1.664	52 (LAVA FDR < 0.1)	TCF4
61	18	60029122-60031599	rs34950264	60029122	A	G	0.0366978	Yes	Yes	-	intronic	4	5	0.047	x	TNFRSF11A
62	19	37440363-38163533	rs12971925	37747224	A	G	0.00757951	x	Yes	+	ncRNA_intronic	4	7	3.936	x	AC012309.5
62	19	38115841-38115841	rs2385119	38115841	A	C	0.0440728	Yes	Yes	-	intronic	5	NA	11.41	x	ZFP30
63	20	30709069-30739825	rs6058534	30736695	A	G	0.0330914	x	Yes	+	intronic	4	7	4.282	x	TM9SF4
64	20	41956451-41967118	rs6030790	41956451	A	C	0.0279954	Yes	Yes	+	intergenic	9	7	4.956	x	SCARNA15
a. Independent genomic risk loci as defined by FUMA b. Minimum-Maximum genomic position in each LD block c. Index lead SNP d. Genomic position of SNPs based on hg19 e. Original GWAS significance (5e-8) or not in multidimensional pain f. Original GWAS significance (5e-8) or not in suicide attempt g. Concodance of effect between multidimensional pain and suicide attempt; when different directions, …

## Sheet: Table S4
Supplementary Table 4. Lead SNPs of shared genetic loci between multidimensional pain and suicide death
Genomic locia	CHR	Min-Max BPb	Indexc	BPd	A1	A2	conjFDR	Novel in Mpe	Novel in SAf	Concodant effectg	Functionality	minChrState	RDBh	CADDi	LAVA Locj	NearestGene
1	1	208424858-208436730	rs12135577	208424858	A	G	0.0272664	Yes	Yes	+	ncRNA_intronic	5	7	2.538	4	ENSG00000304011; ENSG00000286198
2	2	53174349-53180166	rs17043868	53180166	T	G	0.0387765	Yes	Yes	+	ncRNA_intronic	9	7	1.301	x	ENSG00000228033
3	7	114003712-114010651	rs11505922	114010651	T	C	0.0195732	Yes	Yes	-/+	intronic	7	7	5.436	x	FOXP2
3	7	114199599-114199599	rs7783870	114199599	A	G	0.0427299	Yes	Yes	-	intronic	5	7	6.457	x	FOXP2
4	9	80520544-80520544	rs4582625	80520544	T	C	0.0412834	Yes	Yes	+	intronic	4	6	1.996	x	GNAQ
5	10	9681387-9681387	rs67204507	9681387	T	C	0.0442058	Yes	Yes	-	ncRNA_intronic	9	5	0.627	x	ENSG00000303638
6	14	69674352-69785699	rs12433032	69752984	A	C	0.0168515	x	Yes	-	intronic	5	6	15.68	x	GALNT16
7	18	31314721-31422612	rs8090097	31413448	T	G	0.00813241	x	Yes	-	intergenic	5	6	8.2	x	NOL4
8	19	19429220-19469296	rs10421505	19459554	T	C	0.00447906	Yes	Yes	+	intronic	4	5	0.429	x	MAU2
8	19	19480573-19480573	rs4808948	19480573	A	G	0.049416	Yes	Yes	+	ncRNA_intronic	5	6	1.317	x	ENSG00000294647
a. Independent genomic risk loci as defined by FUMA b. Minimum-Maximum genomic position in each LD block c. Index lead SNP d. Genomic position of SNPs based on hg19 e. Original GWAS significance (5e-8) or not in multidimensional pain f. Original GWAS significance (5e-8) or not in suicide death g. Concodance of effect between multidimensional pain and suicide death; when different directions, firs…

## Sheet: Table S5
Supplementary Table 5. Full results from conjFDR analysis for shared loci between multidimensional pain and suicide attempt
Genomic locia	SNP	Indexb	CHR	BPc	A1	A2	conjFDR	Novel in MPd	Novel in SAe	Concodant effectf
1	rs10493396	rs2310819	1	66547212	A	G	0.0245937	Yes	Yes	-
1	rs11208774	rs2310819	1	66410109	T	C	0.0275308	Yes	Yes	+
1	rs11208775	rs2310819	1	66410541	T	C	0.0271828	Yes	Yes	+
1	rs1392817	rs2310819	1	66539456	A	G	0.0476676	Yes	Yes	-
1	rs1937450	rs2310819	1	66478840	T	G	0.0176525	Yes	Yes	-
1	rs2186120	rs2310819	1	66453163	A	G	0.0290563	Yes	Yes	+
1	rs2310754	rs2310819	1	66403092	A	G	0.0287111	Yes	Yes	+
1	rs2310819	rs2310819	1	66440096	T	C	0.0116102	Yes	Yes	+
1	rs2503185	rs2310819	1	66461401	A	G	0.0259235	Yes	Yes	+
1	rs3009872	rs2310819	1	66411400	T	C	0.0385875	Yes	Yes	+
1	rs4255357	rs2310819	1	66399895	A	G	0.0293202	Yes	Yes	+
1	rs57550775	rs2310819	1	66542025	T	G	0.026095	Yes	Yes	+
1	rs6661750	rs2310819	1	66546884	A	G	0.0392932	Yes	Yes	-
1	rs6690101	rs2310819	1	66414039	T	C	0.0267107	Yes	Yes	-
1	rs72679121	rs72679121	1	66625369	A	G	0.0481058	Yes	Yes	+
1	rs7519259	rs2310819	1	66434743	A	G	0.0160056	Yes	Yes	+
1	rs7528604	rs2310819	1	66407352	A	G	0.0382932	Yes	Yes	-
1	rs7534143	rs2310819	1	66470379	T	G	0.027094	Yes	Yes	-
1	rs7539350	rs2310819	1	66546376	A	G	0.0391753	Yes	Yes	+
1	rs7548408	rs2310819	1	66545889	T	C	0.0231253	Yes	Yes	-
1	rs868321	rs2310819	1	66541838	A	G	0.0394921	Yes	Yes	-
1	rs884712	rs2310819	1	66541305	T	G	0.0262609	Yes	Yes	+
2	rs10889802	rs10889802	1	69688082	T	C	0.0349829	Yes	Yes	+
3	rs10789363	rs4650206	1	73668519	A	G	0.0434788	Yes	Yes	-
3	rs11210176	rs4650206	1	73654543	A	G	0.046447	Yes	Yes	+
3	rs11210182	rs4650206	1	73666825	A	G	0.0468329	Yes	Yes	+
3	rs11210186	rs4650206	1	73711811	T	C	0.0384644	Yes	Yes	+
3	rs11210187	rs4650206	1	73715233	T	C	0.0392226	Yes	Yes	-
3	rs11210261	rs4650206	1	73941881	A	C	0.048342	Yes	Yes	-
3	rs11210263	rs4650206	1	73942894	T	C	0.0483697	Yes	Yes	-
3	rs12142152	rs4650206	1	73655313	A	C	0.0408295	Yes	Yes	+
3	rs12754690	rs4650206	1	73939898	T	C	0.0488717	Yes	Yes	-
3	rs4649981	rs4650206	1	73652349	A	G	0.0436469	Yes	Yes	+
3	rs4650200	rs4650206	1	73652197	A	G	0.0440655	Yes	Yes	+
3	rs4650206	rs4650206	1	73720577	T	C	0.0381941	Yes	Yes	-
3	rs6424535	rs4650206	1	73664320	A	G	0.046018	Yes	Yes	-
3	rs6675954	rs4650206	1	73701723	T	C	0.0390089	Yes	Yes	+
3	rs6684541	rs4650206	1	73706169	A	C	0.0388308	Yes	Yes	-
3	rs6697023	rs4650206	1	73701671	T	G	0.0386419	Yes	Yes	+
3	rs7533366	rs4650206	1	73696114	A	G	0.0412357	Yes	Yes	+
4	rs10875021	rs6593601	1	96970844	A	G	0.0398288	Yes	Yes	-
4	rs10875032	rs7554256	1	97198331	T	G	0.0104258	Yes	Yes	-/+
4	rs111618810	rs7554256	1	97227897	A	G	0.0477646	Yes	Yes	+/-
4	rs11165702	rs7554256	1	97156678	A	G	0.0331703	Yes	Yes	+/-
4	rs11165710	rs7554256	1	97195650	A	G	0.00909768	Yes	Yes	-/+
4	rs12022396	rs7554256	1	97149118	T	G	0.0329764	Yes	Yes	+/-
4	rs12027900	rs7554256	1	97144206	T	C	0.0400546	Yes	Yes	-/+
4	rs12030015	rs7554256	1	97211631	A	C	0.0127531	Yes	Yes	-/+
4	rs12071257	rs7554256	1	97147785	A	C	0.0391398	Yes	Yes	-/+
4	rs12075038	rs7554256	1	97241966	A	G	0.0114491	Yes	Yes	+/-
4	rs12083801	rs7554256	1	97132291	T	C	0.0111997	Yes	Yes	+/-
4	rs12097991	rs7554256	1	97147948	T	G	0.0391398	Yes	Yes	+/-
4	rs12565876	rs7554256	1	97116269	A	G	0.0110488	Yes	Yes	-/+
4	rs12567806	rs7554256	1	97131614	T	C	0.0172238	Yes	Yes	+/-
4	rs12750228	rs7554256	1	97125475	T	C	0.0146344	Yes	Yes	-/+
4	rs12752407	rs7554256	1	97128656	T	C	0.0114402	Yes	Yes	+/-
4	rs1339429	rs7554256	1	97141811	T	C	0.038624	Yes	Yes	+/-
4	rs1591868	rs7554256	1	97177087	T	G	0.0109372	Yes	Yes	+/-
4	rs162016	rs6593601	1	96831180	T	C	0.0490881	Yes	Yes	-
4	rs162017	rs6593601	1	96824413	A	G	0.0482425	Yes	Yes	+
4	rs17524886	rs7554256	1	97151495	T	C	0.0329624	Yes	Yes	-/+
4	rs188513920	rs6593601	1	96845641	T	C	0.0426018	Yes	Yes	-
4	rs2021640	rs7554256	1	97154088	A	G	0.0332802	Yes	Yes	-/+
4	rs2066112	rs7554256	1	97225921	T	C	0.0106176	Yes	Yes	+/-
4	rs2088251	rs7554256	1	97204203	T	C	0.0100497	Yes	Yes	+/-
4	rs2088255	rs7554256	1	97140193	T	C	0.0405247	Yes	Yes	-/+
4	rs2172980	rs7554256	1	97178806	T	C	0.011002	Yes	Yes	+/-
4	rs273860	rs7554256	1	97239256	T	G	0.0151416	Yes	Yes	+/-
4	rs273863	rs7554256	1	97259118	A	G	0.013452	Yes	Yes	+/-
4	rs273865	rs7554256	1	97263676	T	G	0.0137047	Yes	Yes	+/-
4	rs273870	rs7554256	1	97245894	A	G	0.0113728	Yes	Yes	-/+
4	rs273875	rs7554256	1	97251845	A	C	0.0116529	Yes	Yes	+/-
4	rs273876	rs7554256	1	97220771	T	C	0.010399	Yes	Yes	-/+
4	rs273877	rs7554256	1	97216336	A	G	0.0117676	Yes	Yes	-/+
4	rs273885	rs7554256	1	97279692	T	C	0.0117637	Yes	Yes	-/+
4	rs273886	rs7554256	1	97278804	A	G	0.0116654	Yes	Yes	-/+
4	rs325944	rs6593601	1	96831613	A	G	0.0464707	Yes	Yes	-
4	rs325946	rs6593601	1	96830675	A	C	0.0487519	Yes	Yes	-
4	rs325949	rs6593601	1	96823803	T	C	0.048719	Yes	Yes	+
4	rs35137759	rs7554256	1	97266007	A	G	0.0122648	Yes	Yes	+/-
4	rs35647213	rs7554256	1	97133583	T	G	0.0414226	Yes	Yes	-/+
4	rs3748784	rs7554256	1	97187174	A	G	0.0272605	Yes	Yes	+/-
4	rs3762409	rs7554256	1	97236130	A	G	0.0108826	Yes	Yes	-/+
4	rs3762411	rs7554256	1	97189091	A	G	0.00981961	Yes	Yes	-/+
4	rs3908925	rs7554256	1	97177176	A	G	0.0109423	Yes	Yes	+/-
4	rs4314929	rs7554256	1	97120880	A	G	0.0224038	Yes	Yes	-/+
4	rs4320828	rs7554256	1	97118669	T	C	0.0306097	Yes	Yes	-/+
4	rs4576698	rs7554256	1	97117144	A	C	0.0121195	Yes	Yes	+/-
4	rs4949941	rs7554256	1	97183853	A	G	0.0094577	Yes	Yes	+/-
4	rs4950005	rs7554256	1	97115768	T	C	0.0132004	Yes	Yes	-/+
4	rs4950006	rs7554256	1	97120243	A	G	0.0197451	Yes	Yes	+/-
4	rs4950007	rs7554256	1	97120311	T	G	0.0372411	Yes	Yes	-/+
4	rs4950008	rs7554256	1	97120671	T	C	0.0297239	Yes	Yes	+/-
4	rs56257350	rs7554256	1	97180984	T	G	0.011554	Yes	Yes	+/-
4	rs6593601	rs6593601	1	96946401	A	C	0.0322362	Yes	Yes	+
4	rs6661004	rs7554256	1	97196484	T	G	0.00992122	Yes	Yes	-/+
4	rs6662347	rs7554256	1	97175111	A	G	0.0103099	Yes	Yes	+/-
4	rs6662721	rs7554256	1	97171725	A	G	0.014151	Yes	Yes	-/+
4	rs6673531	rs7554256	1	97115049	A	G	0.0142027	Yes	Yes	-/+
4	rs6683362	rs7554256	1	97255772	T	C	0.0108656	Yes	Yes	+/-
4	rs6683691	rs7554256	1	97130261	T	C	0.0113761	Yes	Yes	-/+
4	rs6683790	rs7554256	1	97121546	A	G	0.0127661	Yes	Yes	+/-
4	rs6698585	rs7554256	1	97115082	T	C	0.0414543	Yes	Yes	-/+
4	rs7533165	rs7554256	1	97179722	A	G	0.0118531	Yes	Yes	+/-
4	rs7548031	rs7554256	1	97226773	T	G	0.0106837	Yes	Yes	-/+
4	rs7550465	rs7554256	1	97159667	T	C	0.0334301	Yes	Yes	+/-
4	rs7552545	rs7554256	1	97188394	T	G	0.0102981	Yes	Yes	-/+
4	rs7554256	rs7554256	1	97167384	A	G	0.00784513	Yes	Yes	+/-
4	rs7554259	rs7554256	1	97167390	A	G	0.0109497	Yes	Yes	+/-
4	rs996315	rs7554256	1	97154634	T	C	0.0322216	Yes	Yes	+/-
5	rs10747488	rs75641275	1	98299475	A	C	0.0286124	x	Yes	-/+
5	rs10747489	rs75641275	1	98318735	T	C	0.0345258	x	Yes	-/+
5	rs10747490	rs75641275	1	98325796	A	G	0.0460364	x	Yes	-/+
5	rs10747491	rs75641275	1	98341152	T	G	0.0466788	x	Yes	-/+
5	rs10747492	rs75641275	1	98342417	A	G	0.0470725	x	Yes	-/+
5	rs10747495	rs75641275	1	98470605	A	G	0.0455483	Yes	Yes	+/-
5	rs10747496	rs75641275	1	98489330	T	C	0.0368536	Yes	Yes	-/+
5	rs10783082	rs75641275	1	98490636	T	C	0.0368533	Yes	Yes	+/-
5	rs10875113	rs75641275	1	98346177	T	C	0.0462738	x	Yes	+/-
5	rs10875118	rs75641275	1	98365310	A	C	0.0400562	x	Yes	+/-
5	rs10875120	rs75641275	1	98399903	T	G	0.0483076	Yes	Yes	-/+
5	rs10875124	rs75641275	1	98494185	A	G	0.0354873	Yes	Yes	-/+
5	rs10875125	rs75641275	1	98494200	A	C	0.0332393	Yes	Yes	+/-
5	rs11165920	rs75641275	1	98325947	A	G	0.0272757	x	Yes	-/+
5	rs11165921	rs75641275	1	98334990	T	G	0.0446667	x	Yes	-/+
5	rs11165935	rs75641275	1	98422612	A	G	0.0350515	Yes	Yes	+/-
5	rs1198571	rs75641275	1	98497672	A	G	0.0352895	Yes	Yes	+/-
5	rs1198572	rs75641275	1	98497176	A	C	0.0397677	x	Yes	+/-
5	rs1198573	rs75641275	1	98495513	T	C	0.035316	Yes	Yes	+/-
5	rs1198574	rs75641275	1	98494606	A	G	0.0353423	Yes	Yes	+/-
5	rs1198575	rs75641275	1	98562260	T	C	0.0281249	Yes	Yes	+/-
5	rs1198577	rs75641275	1	98559024	T	C	0.0416676	Yes	Yes	+/-
5	rs1198589	rs75641275	1	98550411	T	C	0.0420122	Yes	Yes	+/-
5	rs1198590	rs75641275	1	98550374	A	G	0.0324675	Yes	Yes	-/+
5	rs12062845	rs75641275	1	98342685	A	C	0.0427824	x	Yes	+/-
5	rs12068763	rs75641275	1	98442308	T	G	0.048499	x	Yes	-/+
5	rs12072739	rs75641275	1	98315893	A	G	0.0114595	x	Yes	-/+
5	rs12089031	rs75641275	1	98316355	T	C	0.0131087	x	Yes	+/-
5	rs12406713	rs75641275	1	98359342	T	C	0.0461396	x	Yes	-/+
5	rs1625579	rs75641275	1	98502934	T	G	0.0435824	x	Yes	-/+
5	rs1702294	rs75641275	1	98501984	T	C	0.0435909	x	Yes	+/-
5	rs1782811	rs75641275	1	98502410	A	C	0.0435378	Yes	Yes	+/-
5	rs1782813	rs75641275	1	98499843	T	C	0.0465802	Yes	Yes	+/-
5	rs1782815	rs75641275	1	98498898	A	C	0.041032	Yes	Yes	-/+
5	rs1801265	rs75641275	1	98348885	A	G	0.0370716	x	Yes	-/+
5	rs1892549	rs75641275	1	98482693	A	G	0.034046	Yes	Yes	+/-
5	rs1892550	rs75641275	1	98482828	A	G	0.0340342	Yes	Yes	+/-
5	rs1892551	rs75641275	1	98482961	T	C	0.0340131	Yes	Yes	-/+
5	rs1892552	rs75641275	1	98483035	A	G	0.0340678	Yes	Yes	-/+
5	rs1938558	rs75641275	1	98484954	T	G	0.0350297	Yes	Yes	-/+
5	rs1938559	rs75641275	1	98485102	A	G	0.0349778	Yes	Yes	-/+
5	rs1938560	rs75641275	1	98485192	T	C	0.0345858	Yes	Yes	-/+
5	rs1938561	rs75641275	1	98476718	A	G	0.0476116	Yes	Yes	-/+
5	rs1938567	rs75641275	1	98480128	T	C	0.0367043	Yes	Yes	+/-
5	rs1938568	rs75641275	1	98491732	T	C	0.0359671	Yes	Yes	+/-
5	rs1938569	rs75641275	1	98493263	A	G	0.0362223	Yes	Yes	+/-
5	rs1938570	rs75641275	1	98461954	T	C	0.0483168	Yes	Yes	+/-
5	rs1938572	rs75641275	1	98484474	T	C	0.0390663	Yes	Yes	+/-
5	rs1938573	rs75641275	1	98484617	T	C	0.0328439	Yes	Yes	-/+
5	rs2391904	rs75641275	1	98483150	A	G	0.0341403	Yes	Yes	+/-
5	rs2391905	rs75641275	1	98489735	T	C	0.0372001	Yes	Yes	+/-
5	rs2660304	rs75641275	1	98512127	T	G	0.0353178	x	Yes	-/+
5	rs2802525	rs75641275	1	98549810	A	G	0.0471086	Yes	Yes	+/-
5	rs2802535	rs75641275	1	98508258	T	C	0.0423198	x	Yes	-/+
5	rs2802536	rs75641275	1	98556115	T	C	0.0413615	Yes	Yes	+/-
5	rs28582591	rs75641275	1	98426476	A	G	0.0302525	Yes	Yes	+/-
5	rs28641479	rs75641275	1	98425888	A	G	0.0301236	Yes	Yes	-/+
5	rs4245673	rs75641275	1	98491473	A	C	0.036001	Yes	Yes	+/-
5	rs4292998	rs75641275	1	98507696	A	G	0.0480951	x	Yes	+/-
5	rs4322261	rs75641275	1	98405856	A	G	0.0224456	Yes	Yes	-/+
5	rs4372296	rs75641275	1	98320492	A	C	0.0311644	x	Yes	-/+
5	rs4375301	rs75641275	1	98298371	A	G	0.0197614	x	Yes	-/+
5	rs4378243	rs75641275	1	98395881	T	G	0.0339703	Yes	Yes	-/+
5	rs4379706	rs75641275	1	98322379	T	C	0.0292794	x	Yes	-/+
5	rs4399192	rs75641275	1	98376502	T	G	0.0396323	x	Yes	-/+
5	rs4411173	rs75641275	1	98507718	A	C	0.042962	Yes	Yes	-/+
5	rs4421623	rs75641275	1	98316285	T	G	0.0286895	x	Yes	+/-
5	rs4423049	rs75641275	1	98409303	A	C	0.0445649	Yes	Yes	-/+
5	rs4447033	rs75641275	1	98484291	A	G	0.0363617	Yes	Yes	-/+
5	rs4477335	rs75641275	1	98486162	T	C	0.0349012	Yes	Yes	+/-
5	rs4478846	rs75641275	1	98396847	T	C	0.0280338	Yes	Yes	-/+
5	rs4480407	rs75641275	1	98486370	A	G	0.043443	Yes	Yes	-/+
5	rs4495746	rs75641275	1	98409901	A	G	0.0454794	Yes	Yes	+/-
5	rs4506495	rs75641275	1	98404234	T	C	0.0201593	Yes	Yes	-/+
5	rs4523551	rs75641275	1	98327831	T	C	0.0485779	x	Yes	-/+
5	rs4523552	rs75641275	1	98328093	T	C	0.0274395	x	Yes	+/-
5	rs4584446	rs75641275	1	98489478	A	G	0.0368911	Yes	Yes	+/-
5	rs4598523	rs75641275	1	98410616	T	C	0.0418536	Yes	Yes	-/+
5	rs4634961	rs75641275	1	98487763	A	G	0.0378312	Yes	Yes	-/+
5	rs4950117	rs75641275	1	98490165	T	C	0.0444066	Yes	Yes	-/+
5	rs4950118	rs75641275	1	98490358	T	G	0.0359956	Yes	Yes	-/+
5	rs4950119	rs75641275	1	98491248	A	C	0.0394446	x	Yes	+/-
5	rs4950120	rs75641275	1	98491382	A	G	0.0353433	Yes	Yes	-/+
5	rs4970719	rs75641275	1	98318162	A	G	0.0290344	x	Yes	+/-
5	rs4970720	rs75641275	1	98326447	A	G	0.0460489	x	Yes	-/+
5	rs4970721	rs75641275	1	98342067	A	C	0.0434417	x	Yes	-/+
5	rs4970723	rs75641275	1	98353416	A	G	0.0426982	x	Yes	+/-
5	rs5005705	rs75641275	1	98487510	A	C	0.0450725	Yes	Yes	-/+
5	rs61785881	rs75641275	1	98447298	A	C	0.0418209	Yes	Yes	-/+
5	rs61785882	rs75641275	1	98448341	A	G	0.0448031	Yes	Yes	-/+
5	rs61785886	rs75641275	1	98455957	A	G	0.0465699	Yes	Yes	+/-
5	rs61785888	rs75641275	1	98456731	T	C	0.0484156	Yes	Yes	+/-
5	rs61787782	rs75641275	1	98310239	A	G	0.0122564	x	Yes	-/+
5	rs61787783	rs75641275	1	98330948	A	G	0.0495958	Yes	Yes	-/+
5	rs61787784	rs75641275	1	98331051	A	G	0.0491091	Yes	Yes	-/+
5	rs61787819	rs75641275	1	98344088	T	C	0.0271386	x	Yes	-/+
5	rs61787820	rs75641275	1	98344661	T	C	0.0445687	x	Yes	-/+
5	rs61787823	rs75641275	1	98375391	T	C	0.0366849	x	Yes	+/-
5	rs61787826	rs75641275	1	98381860	T	C	0.0350483	x	Yes	-/+
5	rs61789077	rs75641275	1	98428260	T	C	0.0275764	Yes	Yes	+/-
5	rs61789078	rs75641275	1	98431165	A	G	0.038601	Yes	Yes	-/+
5	rs61789082	rs75641275	1	98437556	T	G	0.039151	Yes	Yes	-/+
5	rs6658412	rs75641275	1	98309251	A	C	0.0269301	x	Yes	+/-
5	rs6677116	rs75641275	1	98337283	A	G	0.0455466	x	Yes	+/-
5	rs6689552	rs75641275	1	98382113	A	G	0.0368176	Yes	Yes	-/+
5	rs6692580	rs75641275	1	98382114	T	G	0.0367345	Yes	Yes	-/+
5	rs7418577	rs75641275	1	98362040	T	C	0.0451941	x	Yes	+/-
5	rs7524038	rs75641275	1	98345019	A	G	0.0467241	x	Yes	-/+
5	rs7526108	rs75641275	1	98305394	A	G	0.0383433	x	Yes	-/+
5	rs75451404	rs75641275	1	98385830	T	C	0.0452292	Yes	Yes	-/+
5	rs75513088	rs75641275	1	98430950	A	C	0.0385392	Yes	Yes	+/-
5	rs75641275	rs75641275	1	98327133	A	C	0.00788878	x	Yes	-/+
5	rs76003396	rs75641275	1	98379562	A	G	0.0464526	Yes	Yes	+/-
5	rs76586805	rs75641275	1	98330439	T	C	0.0496451	Yes	Yes	-/+
5	rs79055225	rs75641275	1	98383395	T	C	0.0334432	x	Yes	+/-
5	rs9285628	rs75641275	1	98421934	A	G	0.0366664	Yes	Yes	+/-
5	rs9324374	rs75641275	1	98357727	T	C	0.0445553	x	Yes	+/-
5	rs9324379	rs75641275	1	98421965	A	C	0.0366867	Yes	Yes	-/+
5	rs9324381	rs75641275	1	98475913	A	G	0.0493419	Yes	Yes	-/+
5	rs9324382	rs75641275	1	98483322	T	C	0.043006	Yes	Yes	+/-
5	rs9324383	rs75641275	1	98485573	T	C	0.0349686	Yes	Yes	-/+
5	rs9324384	rs75641275	1	98487566	T	C	0.0359317	Yes	Yes	-/+
5	rs9324385	rs75641275	1	98487899	A	C	0.0360165	Yes	Yes	-/+
5	rs9324386	rs75641275	1	98487959	A	G	0.0360756	Yes	Yes	-/+
5	rs9324387	rs75641275	1	98488030	A	G	0.0369579	Yes	Yes	-/+
5	rs9324388	rs75641275	1	98488155	A	G	0.0361406	Yes	Yes	-/+
5	rs9324389	rs75641275	1	98492854	T	C	0.0356211	Yes	Yes	+/-
5	rs9440288	rs75641275	1	98460106	A	G	0.0495317	Yes	Yes	-/+
5	rs9440293	rs75641275	1	98476950	T	C	0.0429105	Yes	Yes	+/-
5	rs9440393	rs75641275	1	98492462	T	C	0.0359901	Yes	Yes	-/+
5	rs9658841	rs75641275	1	98488895	T	C	0.0369085	Yes	Yes	-/+
5	rs9659380	rs75641275	1	98423149	A	G	0.0376026	Yes	Yes	-/+
5	rs9659624	rs75641275	1	98487333	A	G	0.0360273	Yes	Yes	+/-
5	rs9659996	rs75641275	1	98488863	A	G	0.0363545	Yes	Yes	+/-
5	rs9661157	rs75641275	1	98489080	A	G	0.036931	Yes	Yes	-/+
5	rs9661794	rs75641275	1	98336329	A	G	0.0435413	x	Yes	-/+
5	rs9662719	rs75641275	1	98369744	A	G	0.0400221	x	Yes	-/+
5	rs9662870	rs75641275	1	98378786	A	C	0.0387471	Yes	Yes	+/-
5	rs9725319	rs75641275	1	98485927	T	C	0.0349121	Yes	Yes	+/-
5	rs9727941	rs75641275	1	98476958	T	C	0.0451956	Yes	Yes	-/+
5	rs9727976	rs75641275	1	98376245	T	C	0.0351658	x	Yes	-/+
5	rs9729897	rs75641275	1	98391864	A	C	0.047158	Yes	Yes	-/+
6	rs10399871	rs10399871	1	146883384	T	C	0.0417246	Yes	Yes	+
6	rs12126629	rs10399871	1	146882556	T	C	0.0421394	Yes	Yes	+
7	rs3771238	rs3771239	2	20414258	A	G	0.0471335	Yes	Yes	-
7	rs3771239	rs3771239	2	20412735	T	C	0.0420212	Yes	Yes	-
7	rs3771241	rs3771239	2	20412526	A	G	0.0432746	Yes	Yes	+
7	rs3771244	rs3771239	2	20412197	T	C	0.0478419	Yes	Yes	+
7	rs74346376	rs3771239	2	20415566	A	G	0.0467319	Yes	Yes	+
8	rs12615111	rs41476545	2	23241579	A	G	0.0485886	Yes	Yes	-
8	rs12621794	rs41476545	2	23241596	A	C	0.0491156	Yes	Yes	-
8	rs13422947	rs41476545	2	23234798	A	G	0.0498778	Yes	Yes	-
8	rs1867914	rs41476545	2	23239848	A	C	0.0491804	Yes	Yes	-
8	rs41458646	rs41476545	2	23238943	A	G	0.0468475	Yes	Yes	+
8	rs41476545	rs41476545	2	23239369	T	C	0.0468071	Yes	Yes	+
9	rs10185736	rs7589627	2	27321224	T	C	0.0371847	x	Yes	+
9	rs1057394	rs7589627	2	27324036	A	G	0.0449037	x	Yes	+
9	rs11126784	rs7589627	2	27169842	A	C	0.0481212	x	Yes	+
9	rs11126857	rs7589627	2	27297757	A	G	0.0436324	x	Yes	-
9	rs1131375	rs7589627	2	27323385	T	C	0.0456337	x	Yes	-
9	rs11691465	rs7589627	2	27334339	A	G	0.0460914	x	Yes	+
9	rs12615423	rs7589627	2	27158623	T	G	0.0333287	x	Yes	-
9	rs12714094	rs7589627	2	27336432	A	C	0.0371025	x	Yes	+
9	rs13423359	rs7589627	2	27334900	T	G	0.0448164	x	Yes	-
9	rs1866559	rs7589627	2	27335586	T	C	0.0305183	x	Yes	+
9	rs1992311	rs7589627	2	27159341	A	G	0.0314817	x	Yes	+
9	rs2289360	rs7589627	2	27302165	T	C	0.0468804	x	Yes	-
9	rs2304681	rs7589627	2	27315252	A	G	0.046538	x	Yes	-
9	rs2384511	rs7589627	2	27152735	A	G	0.0443436	x	Yes	+
9	rs2384572	rs7589627	2	27324751	T	G	0.048676	x	Yes	+
9	rs35314190	rs7589627	2	27339116	T	C	0.0398176	x	Yes	-
9	rs3739085	rs7589627	2	27163044	T	C	0.0303101	x	Yes	-
9	rs3739086	rs7589627	2	27165202	T	C	0.0447029	x	Yes	+
9	rs3739088	rs7589627	2	27167784	T	C	0.0356988	x	Yes	-
9	rs3769135	rs7589627	2	27168411	A	G	0.0346519	x	Yes	-
9	rs3769136	rs7589627	2	27168743	T	C	0.0496401	x	Yes	+
9	rs3769137	rs7589627	2	27169490	T	C	0.0464787	x	Yes	-
9	rs3769139	rs7589627	2	27315714	T	C	0.0494331	x	Yes	+
9	rs3820821	rs7589627	2	27155848	T	C	0.0330227	x	Yes	+
9	rs3820822	rs7589627	2	27155862	A	G	0.0345359	x	Yes	-
9	rs3820823	rs7589627	2	27164806	A	G	0.0347773	x	Yes	+
9	rs4665363	rs7589627	2	27156416	T	G	0.0337692	x	Yes	+
9	rs4665929	rs7589627	2	27155849	T	G	0.0332371	x	Yes	-
9	rs6547317	rs7589627	2	27151919	A	G	0.0444807	x	Yes	-
9	rs6547318	rs7589627	2	27153481	A	C	0.0490811	x	Yes	-
9	rs6547413	rs7589627	2	27312882	A	G	0.0440689	x	Yes	-
9	rs6707735	rs7589627	2	27166822	T	C	0.0409062	x	Yes	-
9	rs6718978	rs7589627	2	27161591	A	G	0.0352342	x	Yes	+
9	rs6754371	rs7589627	2	27315064	A	G	0.0433913	x	Yes	+
9	rs6759548	rs7589627	2	27161060	A	G	0.0314533	x	Yes	-
9	rs7355650	rs7589627	2	27245475	T	C	0.0477832	x	Yes	+
9	rs7579579	rs7589627	2	27151842	T	C	0.0452967	x	Yes	-
9	rs7582361	rs7589627	2	27336376	T	C	0.0302987	x	Yes	+
9	rs7589627	rs7589627	2	27159786	T	C	0.0207887	x	Yes	+
9	rs7599286	rs7589627	2	27152398	T	C	0.0439313	x	Yes	-
9	rs7605526	rs7589627	2	27345484	A	G	0.0419212	x	Yes	-
9	rs920435	rs7589627	2	27157788	T	C	0.0218567	x	Yes	+
9	rs920437	rs7589627	2	27157396	A	G	0.0326074	x	Yes	-
10	rs1544850	rs1544850	2	60167206	T	C	0.027554	Yes	Yes	+
10	rs4671357	rs1544850	2	60136176	T	C	0.046777	Yes	Yes	-
10	rs4672332	rs1544850	2	60173540	T	C	0.0308746	Yes	Yes	+
10	rs6719762	rs1544850	2	60166832	T	C	0.0335113	Yes	Yes	-
11	rs1029986	rs2419903	2	60526817	T	C	0.0462524	Yes	Yes	+
11	rs2419903	rs2419903	2	60528052	T	C	0.0394323	Yes	Yes	-
11	rs4672382	rs2419903	2	60523657	A	C	0.0425447	x	Yes	-
11	rs4672384	rs2419903	2	60527394	A	G	0.0469623	Yes	Yes	+
11	rs4672385	rs2419903	2	60527504	T	C	0.0439619	Yes	Yes	-
11	rs907573	rs2419903	2	60523559	A	G	0.0425606	x	Yes	-
12	rs17782474	rs17782474	2	100265936	A	G	0.0416018	Yes	Yes	-
12	rs4851210	rs4851210	2	100111374	T	C	0.0458537	Yes	Yes	+
13	rs10048736	rs10048736	2	144239303	A	G	0.0119606	x	Yes	-
13	rs10166361	rs10048736	2	144257825	T	C	0.0185375	Yes	Yes	-
13	rs10180461	rs10048736	2	144263033	T	C	0.0252912	Yes	Yes	+
13	rs10189912	rs10048736	2	144162609	A	G	0.0451429	Yes	Yes	+
13	rs10191758	rs10048736	2	144263280	A	G	0.0302328	Yes	Yes	+
13	rs12691680	rs10048736	2	144204338	T	C	0.0218311	Yes	Yes	-
13	rs13024996	rs10048736	2	144225215	A	C	0.0163683	x	Yes	-
13	rs13409451	rs10048736	2	144257639	A	G	0.0279393	Yes	Yes	+
13	rs13411140	rs10048736	2	144215811	T	C	0.0162889	x	Yes	-
13	rs13413953	rs10048736	2	144237036	T	G	0.0210374	Yes	Yes	+
13	rs13428598	rs10048736	2	144250487	T	C	0.021638	x	Yes	-
13	rs28684621	rs10048736	2	144231584	T	G	0.0195168	x	Yes	+
13	rs35125029	rs10048736	2	144261657	A	G	0.0403136	Yes	Yes	-
13	rs35789697	rs10048736	2	144248718	A	G	0.0186496	x	Yes	-
13	rs35942385	rs10048736	2	144208523	T	G	0.0152184	x	Yes	-
13	rs4273169	rs10048736	2	144231309	A	G	0.0171106	x	Yes	-
13	rs4662327	rs10048736	2	144159751	A	G	0.0436802	Yes	Yes	-
13	rs4662334	rs10048736	2	144241887	A	G	0.0185839	x	Yes	+
13	rs62172156	rs10048736	2	144243297	T	C	0.0169657	x	Yes	+
14	rs10497885	rs72961179	2	207857174	A	C	0.03043	Yes	Yes	+
14	rs10497886	rs72961179	2	207858123	T	C	0.0351342	Yes	Yes	+
14	rs111648447	rs72961179	2	207882134	T	C	0.0230542	Yes	Yes	+
14	rs113704739	rs72961179	2	207884286	A	G	0.0328494	Yes	Yes	-
14	rs1453174	rs72961179	2	207877193	A	G	0.04244	Yes	Yes	-
14	rs149980972	rs72961179	2	207883434	A	G	0.0359927	Yes	Yes	-
14	rs150082185	rs72961179	2	207884691	A	G	0.0373831	Yes	Yes	+
14	rs17458580	rs72961179	2	207856551	T	G	0.0301852	Yes	Yes	+
14	rs17536656	rs72961179	2	207855389	T	C	0.0310992	Yes	Yes	-
14	rs17536670	rs72961179	2	207856837	A	C	0.0268097	Yes	Yes	+
14	rs181869831	rs72961179	2	207870936	A	C	0.0298203	Yes	Yes	-
14	rs1986850	rs72961179	2	207879032	A	C	0.022073	Yes	Yes	+
14	rs200920710	rs72961179	2	207868242	T	C	0.0246163	Yes	Yes	-
14	rs2219006	rs72961179	2	207877666	T	C	0.0385383	Yes	Yes	+
14	rs2444300	rs72961179	2	207876188	A	G	0.0329345	Yes	Yes	+
14	rs35996820	rs72961179	2	207878468	T	G	0.0203455	Yes	Yes	-
14	rs530216089	rs72961179	2	207867385	A	G	0.0245131	Yes	Yes	+
14	rs55768806	rs72961179	2	207881497	T	C	0.0242108	Yes	Yes	-
14	rs55793928	rs72961179	2	207872196	T	C	0.033818	Yes	Yes	-
14	rs6741227	rs72961179	2	207881845	T	C	0.0247867	Yes	Yes	-
14	rs72954216	rs72961179	2	207881023	T	C	0.0222797	Yes	Yes	-
14	rs72954225	rs72961179	2	207888870	T	G	0.0384335	Yes	Yes	+
14	rs72954237	rs72961179	2	207891442	A	C	0.0324324	Yes	Yes	+
14	rs72954244	rs72961179	2	207893783	T	C	0.0325566	Yes	Yes	+
14	rs72961159	rs72961179	2	207858551	A	G	0.0330082	Yes	Yes	+
14	rs72961179	rs72961179	2	207874584	T	C	0.0176843	Yes	Yes	-
14	rs72961182	rs72961179	2	207875743	T	C	0.0180407	Yes	Yes	-
14	rs72961183	rs72961179	2	207876863	A	G	0.0182548	Yes	Yes	-
14	rs72961186	rs72961179	2	207877819	T	C	0.0206606	Yes	Yes	+
14	rs76237953	rs72961179	2	207886400	T	C	0.0285768	Yes	Yes	-
14	rs76371363	rs72961179	2	207890625	A	G	0.0314951	Yes	Yes	+
14	rs77341951	rs72961179	2	207860338	T	C	0.0309571	Yes	Yes	-
14	rs880173	rs72961179	2	207849378	T	C	0.0345032	Yes	Yes	+
15	rs13029742	rs7577690	2	220035118	A	C	0.0462666	Yes	Yes	+
15	rs6715064	rs7577690	2	220041928	T	C	0.0442046	Yes	Yes	+
15	rs7577690	rs7577690	2	220045035	A	G	0.0312907	Yes	Yes	+
16	rs3755539	rs3755539	2	241739217	A	G	0.0428945	Yes	Yes	+
17	rs10155014	rs184219667	3	49432321	T	C	0.0488963	x	Yes	-
17	rs10452032	rs184219667	3	49680973	A	G	0.00662916	x	Yes	-
17	rs1078341	rs184219667	3	49685592	A	G	0.00636874	x	Yes	+
17	rs10865956	rs184219667	3	49581559	A	C	0.0482474	x	Yes	-
17	rs1106620	rs184219667	3	49500414	A	G	0.0454771	x	Yes	+
17	rs11130190	rs184219667	3	49402137	T	C	0.0490477	x	Yes	+
17	rs11130204	rs184219667	3	49584243	A	G	0.0440091	x	Yes	+
17	rs11130207	rs184219667	3	49611666	T	G	0.0167656	x	Yes	+
17	rs11130208	rs184219667	3	49615624	T	G	0.0176696	x	Yes	-
17	rs11130211	rs184219667	3	49645209	T	C	0.0243524	x	Yes	-
17	rs11130217	rs184219667	3	49737323	A	G	0.00488788	x	Yes	+
17	rs113741748	rs184219667	3	49490780	A	G	0.0464405	x	Yes	+
17	rs11709734	rs184219667	3	49745235	A	G	0.00411614	x	Yes	-
17	rs11715060	rs184219667	3	49442020	A	G	0.0488605	x	Yes	+
17	rs11716948	rs11716948	3	49431903	T	C	0.0355598	Yes	Yes	+/-
17	rs11720542	rs184219667	3	49357427	A	G	0.0492993	x	Yes	+
17	rs11720705	rs184219667	3	49753788	A	G	0.00398076	x	Yes	+
17	rs11721148	rs184219667	3	49646669	A	G	0.0256724	x	Yes	-
17	rs12637313	rs184219667	3	49645458	A	G	0.0219662	x	Yes	+
17	rs12715437	rs184219667	3	49751856	T	C	0.00477936	x	Yes	+
17	rs13061396	rs184219667	3	49444904	T	C	0.00678941	x	Yes	+
17	rs13091206	rs184219667	3	49238718	A	G	0.00977671	Yes	Yes	+
17	rs13096474	rs184219667	3	49443081	T	C	0.049263	x	Yes	+
17	rs13096480	rs184219667	3	49658084	A	G	0.00669951	x	Yes	+
17	rs1352889	rs184219667	3	49652148	T	C	0.00710225	x	Yes	+
17	rs138084484	rs184219667	3	49483193	T	C	0.0492213	x	Yes	+
17	rs148383796	rs184219667	3	49811047	A	G	0.00931008	x	Yes	+
17	rs1491983	rs184219667	3	49639803	T	G	0.0220429	x	Yes	-
17	rs1586827	rs184219667	3	49671224	T	C	0.00661644	x	Yes	+
17	rs1799844	rs184219667	3	49847642	A	G	0.0102107	x	Yes	+
17	rs184219667	rs184219667	3	49813936	A	C	0.00134877	x	Yes	+
17	rs1996664	rs184219667	3	49878395	A	G	0.00806123	x	Yes	-
17	rs2029591	rs184219667	3	49646981	T	C	0.0214467	x	Yes	+
17	rs2131108	rs184219667	3	49665390	A	G	0.00718681	x	Yes	-
17	rs2140270	rs184219667	3	49439440	A	G	0.0455906	x	Yes	-
17	rs2329021	rs184219667	3	49679072	A	G	0.00688044	x	Yes	-
17	rs2329025	rs184219667	3	49496263	A	G	0.0466977	x	Yes	-
17	rs28535523	rs184219667	3	49848414	T	C	0.0080668	x	Yes	+
17	rs3020779	rs184219667	3	49724808	T	C	0.00441271	x	Yes	+
17	rs34890793	rs184219667	3	49619493	T	C	0.0206054	x	Yes	-
17	rs35129566	rs184219667	3	49866584	T	G	0.00698217	x	Yes	-
17	rs4241405	rs184219667	3	49642027	T	C	0.019936	x	Yes	-
17	rs4855833	rs184219667	3	49657441	A	G	0.00800995	x	Yes	+
17	rs4855838	rs184219667	3	49579876	A	G	0.0332694	x	Yes	+
17	rs4855845	rs184219667	3	49687043	T	C	0.00688108	x	Yes	+
17	rs4855846	rs184219667	3	49683526	A	G	0.00690055	x	Yes	-
17	rs4855848	rs184219667	3	49653457	T	C	0.00687215	x	Yes	-
17	rs4855849	rs184219667	3	49653378	A	G	0.00685318	x	Yes	+
17	rs4855853	rs184219667	3	49579331	T	G	0.0495619	x	Yes	+
17	rs4855869	rs184219667	3	49488984	T	C	0.016749	x	Yes	+
17	rs4855882	rs184219667	3	49715354	T	G	0.00930184	x	Yes	-
17	rs4855885	rs184219667	3	49690199	A	G	0.00989135	x	Yes	-
17	rs4955430	rs184219667	3	49378088	A	G	0.0462468	x	Yes	-
17	rs55754265	rs184219667	3	49687486	T	C	0.0174918	x	Yes	+
17	rs57273516	rs184219667	3	49483074	A	G	0.0493215	x	Yes	+
17	rs59357103	rs184219667	3	49890967	A	G	0.00704894	x	Yes	+
17	rs59684465	rs184219667	3	49874246	T	C	0.0079391	x	Yes	+
17	rs61557789	rs184219667	3	49871201	T	C	0.00820178	x	Yes	+
17	rs62259933	rs184219667	3	49469703	A	G	0.0459483	x	Yes	+
17	rs62260663	rs184219667	3	49814949	T	C	0.00456079	x	Yes	-
17	rs62260723	rs184219667	3	49872124	T	C	0.00666633	x	Yes	-
17	rs62262671	rs184219667	3	49649873	A	G	0.0174208	x	Yes	-
17	rs62262673	rs184219667	3	49661634	T	C	0.00841521	x	Yes	+
17	rs62262675	rs184219667	3	49673662	A	G	0.00981704	x	Yes	-
17	rs62262730	rs184219667	3	49808274	T	G	0.00988801	x	Yes	-
17	rs6446275	rs184219667	3	49466871	A	G	0.0460152	x	Yes	-
17	rs6446284	rs184219667	3	49616997	A	G	0.0179421	x	Yes	+
17	rs6446285	rs184219667	3	49626306	A	G	0.0277655	x	Yes	-
17	rs6446286	rs184219667	3	49681704	A	G	0.00695966	x	Yes	+
17	rs6774202	rs184219667	3	49687779	T	G	0.00785803	x	Yes	+
17	rs6774724	rs184219667	3	49381911	T	G	0.0293343	x	Yes	-
17	rs6790105	rs184219667	3	49393409	T	C	0.0465904	x	Yes	-
17	rs6790568	rs184219667	3	49835450	T	C	0.00532126	x	Yes	+
17	rs6797299	rs184219667	3	49609794	T	G	0.0182648	x	Yes	-
17	rs6804970	rs184219667	3	49804290	T	C	0.00598208	x	Yes	+
17	rs6809879	rs184219667	3	49834571	A	G	0.00490465	x	Yes	-
17	rs72934271	rs184219667	3	49517668	A	G	0.024056	x	Yes	-
17	rs73073004	rs184219667	3	49490020	A	G	0.0203695	Yes	Yes	-
17	rs7613603	rs184219667	3	49812866	T	C	0.00606208	x	Yes	+
17	rs7617480	rs184219667	3	49210732	A	C	0.0486024	x	Yes	+
17	rs7619789	rs184219667	3	49476263	T	C	0.048629	x	Yes	+
17	rs7620024	rs184219667	3	49451691	A	G	0.0482193	x	Yes	+
17	rs7621797	rs184219667	3	49798864	A	G	0.00314361	x	Yes	+
17	rs7628207	rs184219667	3	49754970	T	C	0.0049977	x	Yes	+
17	rs7629322	rs184219667	3	49621994	T	C	0.0225609	x	Yes	-
17	rs7629936	rs11716948	3	49836707	A	G	0.0365105	x	Yes	+/-
17	rs7637711	rs184219667	3	49829653	A	G	0.00541634	x	Yes	-
17	rs7648995	rs184219667	3	49438803	T	C	0.045659	x	Yes	+
17	rs77941694	rs184219667	3	49886319	T	G	0.0169661	x	Yes	+
17	rs80033912	rs11716948	3	49468689	A	C	0.0404137	Yes	Yes	-/+
17	rs8897	rs184219667	3	49460407	T	C	0.0440188	x	Yes	+
17	rs940045	rs184219667	3	49449638	A	G	0.0490139	x	Yes	-
17	rs9654010	rs184219667	3	49480908	T	C	0.0414813	x	Yes	-
17	rs9757181	rs184219667	3	49441847	A	G	0.0105333	x	Yes	+
17	rs9811047	rs184219667	3	49328833	A	C	0.0439619	x	Yes	+
17	rs9817807	rs184219667	3	49442548	A	G	0.0434401	x	Yes	+
17	rs9824435	rs184219667	3	49674343	T	C	0.0102357	x	Yes	-
17	rs9829155	rs184219667	3	49817450	T	C	0.00486868	x	Yes	-
17	rs9835157	rs184219667	3	49797769	A	G	0.00422296	x	Yes	+
17	rs9836756	rs184219667	3	49822909	A	G	0.00471287	x	Yes	+
17	rs9842132	rs184219667	3	49427933	A	G	0.0462995	x	Yes	+
17	rs9851651	rs184219667	3	49825326	A	C	0.00491786	x	Yes	+
17	rs9851930	rs184219667	3	49825369	A	G	0.00489616	x	Yes	+
17	rs9860055	rs184219667	3	49506900	T	C	0.047743	x	Yes	+
17	rs9861027	rs184219667	3	49436584	T	C	0.0456794	x	Yes	+
17	rs9869120	rs184219667	3	49624065	T	C	0.0187192	x	Yes	+
17	rs9869256	rs184219667	3	49624095	T	G	0.0273627	x	Yes	+
17	rs9870755	rs184219667	3	49809841	T	C	0.00485986	x	Yes	+
17	rs9870858	rs184219667	3	49769071	T	C	0.00386296	x	Yes	-
17	rs9883000	rs184219667	3	49667691	T	C	0.00912102	x	Yes	+
18	rs113062903	rs12637784	3	56304954	A	G	0.0172091	Yes	Yes	-
18	rs11707881	rs12637784	3	56311096	A	C	0.0165935	Yes	Yes	+
18	rs11712446	rs12637784	3	56329264	T	G	0.049991	Yes	Yes	-
18	rs11720894	rs12637784	3	56311685	T	C	0.0171375	Yes	Yes	+
18	rs11920229	rs12637784	3	56397071	A	G	0.0413165	Yes	Yes	+
18	rs12629096	rs12637784	3	56309634	A	C	0.0178788	Yes	Yes	+
18	rs12633004	rs12637784	3	56302188	A	G	0.0165247	Yes	Yes	-
18	rs12637784	rs12637784	3	56318675	A	C	0.0161424	Yes	Yes	-
18	rs12638786	rs12637784	3	56315115	T	C	0.0213071	Yes	Yes	-
18	rs17235494	rs12637784	3	56317848	A	G	0.0188118	Yes	Yes	-
18	rs17825368	rs12637784	3	56306140	T	C	0.0165327	Yes	Yes	-
18	rs1869158	rs12637784	3	56313856	A	G	0.0200242	Yes	Yes	+
18	rs1869159	rs12637784	3	56313899	T	C	0.0211694	Yes	Yes	+
18	rs2123180	rs12637784	3	56306729	T	C	0.0370177	Yes	Yes	+
18	rs2123181	rs12637784	3	56311855	A	C	0.0462079	Yes	Yes	-
18	rs34270989	rs12637784	3	56318556	T	C	0.0162224	Yes	Yes	-
18	rs34392996	rs12637784	3	56291697	T	G	0.0459641	Yes	Yes	-
18	rs34715192	rs12637784	3	56338892	T	C	0.0499405	Yes	Yes	+
18	rs35102305	rs12637784	3	56300998	T	C	0.0445054	Yes	Yes	+
18	rs35215252	rs12637784	3	56301105	T	C	0.0463299	Yes	Yes	+
18	rs35341271	rs12637784	3	56298639	T	C	0.0451136	Yes	Yes	-
18	rs36044157	rs12637784	3	56328592	T	G	0.0486722	Yes	Yes	-
18	rs41521744	rs12637784	3	56311202	T	C	0.0167656	Yes	Yes	+
18	rs4974206	rs12637784	3	56393069	T	G	0.0418976	Yes	Yes	-
18	rs55952137	rs12637784	3	56414649	T	C	0.0477908	Yes	Yes	+
18	rs56135751	rs12637784	3	56299694	A	G	0.0417649	Yes	Yes	-
18	rs60900173	rs12637784	3	56312036	A	G	0.0188872	Yes	Yes	+
18	rs6763275	rs12637784	3	56307703	A	G	0.0176992	Yes	Yes	-
18	rs6776240	rs12637784	3	56425451	A	G	0.0422107	Yes	Yes	-
18	rs7623143	rs12637784	3	56088978	T	C	0.0266878	Yes	Yes	+
18	rs7640618	rs12637784	3	56305410	T	C	0.0176361	Yes	Yes	+
19	rs1456182	rs62264957	3	117659680	A	G	0.0409781	Yes	Yes	-
19	rs1499970	rs62264957	3	117692767	A	G	0.0429195	Yes	Yes	+
19	rs1499972	rs62264957	3	117719538	A	C	0.0491211	Yes	Yes	-
19	rs2860308	rs62264957	3	117690309	T	G	0.0439702	Yes	Yes	-
19	rs55704727	rs62264957	3	117616431	T	C	0.0420887	Yes	Yes	-
19	rs55718530	rs62264957	3	117534125	T	C	0.0433935	Yes	Yes	+
19	rs55779525	rs62264957	3	117651483	A	C	0.039879	Yes	Yes	+
19	rs55958116	rs62264957	3	117672772	T	C	0.0365208	Yes	Yes	-
19	rs55979908	rs62264957	3	117598306	A	C	0.0473482	Yes	Yes	+
19	rs56051552	rs62264957	3	117613726	T	C	0.0498215	Yes	Yes	-
19	rs56077465	rs62264957	3	117540517	T	C	0.0464148	Yes	Yes	-
19	rs56148567	rs62264957	3	117540528	A	G	0.0456213	Yes	Yes	+
19	rs56174517	rs62264957	3	117616218	T	G	0.0424003	Yes	Yes	-
19	rs56204450	rs62264957	3	117604215	A	G	0.0420683	Yes	Yes	-
19	rs56256549	rs62264957	3	117612102	A	G	0.0461186	Yes	Yes	+
19	rs56310214	rs62264957	3	117640127	A	G	0.041212	Yes	Yes	-
19	rs59470461	rs62264957	3	117616314	A	C	0.0425059	Yes	Yes	+
19	rs62263076	rs62264957	3	117599798	T	C	0.0463415	Yes	Yes	-
19	rs62263082	rs62264957	3	117605611	T	C	0.0432946	Yes	Yes	-
19	rs62263112	rs62264957	3	117615515	T	C	0.0432973	Yes	Yes	+
19	rs62263115	rs62264957	3	117622116	A	G	0.0423034	Yes	Yes	-
19	rs62263116	rs62264957	3	117622719	T	G	0.0456154	Yes	Yes	+
19	rs62263119	rs62264957	3	117630175	T	G	0.0412984	Yes	Yes	+
19	rs62263121	rs62264957	3	117630348	T	C	0.0424332	Yes	Yes	+
19	rs62263122	rs62264957	3	117630669	T	C	0.0427593	Yes	Yes	+
19	rs62263123	rs62264957	3	117632263	A	G	0.041734	Yes	Yes	-
19	rs62264762	rs62264957	3	117634443	A	C	0.0419894	Yes	Yes	-
19	rs62264763	rs62264957	3	117637305	A	G	0.0434499	Yes	Yes	-
19	rs62264766	rs62264957	3	117641227	A	G	0.0403096	Yes	Yes	+
19	rs62264779	rs62264957	3	117654731	T	G	0.0396573	Yes	Yes	-
19	rs62264782	rs62264957	3	117655445	A	C	0.0402547	Yes	Yes	-
19	rs62264783	rs62264957	3	117658033	A	G	0.0413285	Yes	Yes	-
19	rs62264819	rs62264957	3	117671941	T	C	0.0363437	Yes	Yes	+
19	rs62264956	rs62264957	3	117530775	T	C	0.0443786	Yes	Yes	-
19	rs62264957	rs62264957	3	117532595	A	C	0.0316468	Yes	Yes	+
19	rs62266061	rs62264957	3	117536409	T	C	0.042801	Yes	Yes	-
19	rs62266064	rs62264957	3	117546871	T	C	0.0426807	Yes	Yes	+
19	rs62266065	rs62264957	3	117547059	T	C	0.044893	Yes	Yes	-
19	rs6769144	rs62264957	3	117624517	T	C	0.0409993	Yes	Yes	-
19	rs6794831	rs62264957	3	117642484	A	C	0.0403434	Yes	Yes	-
19	rs6807173	rs62264957	3	117642281	T	G	0.0403112	Yes	Yes	+
19	rs73168378	rs62264957	3	117636234	T	G	0.0420355	Yes	Yes	-
19	rs73168388	rs62264957	3	117645824	T	C	0.0393679	Yes	Yes	-
19	rs73168397	rs62264957	3	117657197	T	C	0.0407512	Yes	Yes	-
19	rs73183041	rs62264957	3	117610500	A	C	0.0420021	Yes	Yes	-
19	rs7630428	rs62264957	3	117528682	A	G	0.0434698	Yes	Yes	+
19	rs7631320	rs62264957	3	117650116	T	C	0.0398384	Yes	Yes	+
19	rs817504	rs62264957	3	117678862	A	C	0.0453029	Yes	Yes	-
19	rs817506	rs62264957	3	117679394	A	G	0.0440996	Yes	Yes	-
19	rs817507	rs62264957	3	117681065	A	C	0.0437988	Yes	Yes	-
19	rs817508	rs62264957	3	117685576	T	C	0.0436558	Yes	Yes	-
20	rs10000497	rs1024120	4	28417836	A	G	0.0232844	x	Yes	+
20	rs1024120	rs1024120	4	28400119	T	C	0.0180246	x	Yes	-
20	rs10939211	rs1024120	4	28400060	A	G	0.0232472	x	Yes	+
20	rs1397439	rs1024120	4	28380212	T	C	0.0494307	x	Yes	+
20	rs1510696	rs1024120	4	28424680	T	G	0.0261448	x	Yes	-
20	rs1510700	rs1024120	4	28403342	T	G	0.0209658	x	Yes	+
20	rs1797046	rs1024120	4	28419156	A	G	0.0250479	x	Yes	+
20	rs1995910	rs1024120	4	28385835	A	G	0.0459929	x	Yes	-
20	rs1995911	rs1024120	4	28385772	A	G	0.0475756	x	Yes	+
20	rs28869182	rs1024120	4	28414868	A	G	0.0274757	x	Yes	+
20	rs4429724	rs1024120	4	28397624	T	C	0.0229564	x	Yes	-
20	rs6448577	rs1024120	4	28402448	A	G	0.0215071	x	Yes	+
20	rs986866	rs1024120	4	28400914	T	C	0.0196486	x	Yes	+
21	rs12650391	rs12650391	4	62813643	T	C	0.0499003	Yes	Yes	+
21	rs2193122	rs2193122	4	62996462	A	G	0.0418612	Yes	Yes	+
22	rs12189006	rs2607144	5	78539672	T	G	0.0479237	Yes	Yes	-
22	rs2591388	rs2607144	5	78557241	A	G	0.0494309	Yes	Yes	+
22	rs2607144	rs2607144	5	78556798	A	C	0.0395502	Yes	Yes	-
22	rs3733893	rs2607144	5	78532658	T	C	0.0435276	Yes	Yes	-
22	rs6453434	rs2607144	5	78570219	T	G	0.0496457	Yes	Yes	+
23	rs1081158	rs254781	5	88004616	T	C	0.0469063	Yes	Yes	+/-
23	rs185291	rs254781	5	88006764	T	C	0.044321	Yes	Yes	-/+
23	rs194225	rs254781	5	88001186	A	G	0.0412699	Yes	Yes	-/+
23	rs254781	rs254781	5	88000636	T	C	0.0366963	Yes	Yes	+/-
23	rs34316	rs254781	5	88015545	A	C	0.0465779	Yes	Yes	-/+
23	rs446219	rs254781	5	88005827	T	C	0.0477737	Yes	Yes	-/+
23	rs447801	rs254781	5	88002653	T	C	0.0406183	Yes	Yes	-/+
23	rs454214	rs254781	5	88003403	T	C	0.0411888	Yes	Yes	+/-
23	rs639725	rs254781	5	88001969	A	G	0.0389982	Yes	Yes	-/+
24	rs12522598	rs12522598	5	120174466	A	G	0.0486525	x	Yes	-
25	rs12163943	rs1504929	5	155848785	T	C	0.0487237	Yes	Yes	-
25	rs1504929	rs1504929	5	155852065	T	G	0.0439833	Yes	Yes	-
25	rs2135029	rs1504929	5	155856538	A	G	0.0493608	Yes	Yes	-
25	rs7718903	rs1504929	5	155846974	T	G	0.0470276	Yes	Yes	+
26	rs7754477	rs9368050	6	19303981	A	G	0.0270391	Yes	Yes	+
26	rs7756952	rs9368050	6	19313381	T	C	0.0242198	Yes	Yes	-
26	rs7770020	rs9368050	6	19252385	T	G	0.0351218	Yes	Yes	+
26	rs9350111	rs9368050	6	19217639	A	G	0.0356163	Yes	Yes	+
26	rs9368050	rs9368050	6	19226575	T	C	0.0191484	Yes	Yes	+
26	rs9465280	rs9368050	6	19216889	A	C	0.0424487	Yes	Yes	+
27	rs4419681	rs9402103	6	129405910	A	G	0.0308431	Yes	Yes	-
27	rs4523106	rs9402103	6	129387875	A	G	0.0486999	Yes	Yes	-
27	rs4538727	rs9402103	6	129408564	A	G	0.0354037	Yes	Yes	-
27	rs4897297	rs9402103	6	129391734	A	G	0.0420775	Yes	Yes	-
27	rs4897301	rs9402103	6	129405189	A	G	0.0314779	Yes	Yes	+
27	rs9372918	rs9402103	6	129393249	A	G	0.0439078	Yes	Yes	+
27	rs9388682	rs9402103	6	129387482	A	G	0.0433354	Yes	Yes	+
27	rs9398893	rs9402103	6	129360123	T	C	0.0488388	Yes	Yes	+
27	rs9402103	rs9402103	6	129410195	A	G	0.0275142	Yes	Yes	+
27	rs9402104	rs9402103	6	129410736	A	G	0.0282678	Yes	Yes	+
28	rs11155821	rs3757323	6	152215722	T	C	0.00572569	x	Yes	+
28	rs12204714	rs3757323	6	152235339	T	C	0.00714631	x	Yes	-
28	rs1913475	rs3757323	6	152245756	T	C	0.0295011	x	Yes	+
28	rs2347867	rs3757323	6	152229850	A	G	0.00682795	x	Yes	-
28	rs2347923	rs3757323	6	152227421	A	C	0.0325608	x	Yes	-
28	rs3020408	rs3757323	6	152264529	A	C	0.0306598	Yes	Yes	+
28	rs3757323	rs3757323	6	152202007	T	C	0.00301656	x	Yes	+
28	rs4305732	rs3757323	6	152240448	A	G	0.00893917	x	Yes	+
28	rs4869748	rs3757323	6	152225383	T	G	0.00632202	x	Yes	+
28	rs4870060	rs3757323	6	152231404	A	G	0.00588204	x	Yes	-
28	rs4870062	rs3757323	6	152237618	T	G	0.0280831	x	Yes	-
28	rs4870063	rs3757323	6	152244647	A	C	0.0300909	x	Yes	-
28	rs6557168	rs3757323	6	152201201	T	C	0.022226	Yes	Yes	-
28	rs6557171	rs3757323	6	152234593	T	C	0.0267648	x	Yes	+
28	rs6911230	rs3757323	6	152263360	A	G	0.0340568	x	Yes	+
28	rs6927072	rs3757323	6	152257687	T	G	0.0361704	x	Yes	+
28	rs9371564	rs3757323	6	152262113	A	G	0.0372761	x	Yes	+
28	rs9479138	rs3757323	6	152215199	T	G	0.00514366	x	Yes	+
29	rs10499288	rs59903549	6	156447210	A	G	0.0310469	Yes	Yes	-
29	rs11962922	rs59903549	6	156461393	T	C	0.0394675	Yes	Yes	+
29	rs11967045	rs59903549	6	156464044	T	C	0.0475216	Yes	Yes	-
29	rs11967768	rs59903549	6	156461152	A	G	0.0419702	Yes	Yes	-
29	rs56939512	rs59903549	6	156454794	A	G	0.0356244	Yes	Yes	+
29	rs57859767	rs59903549	6	156458932	T	C	0.0489207	Yes	Yes	+
29	rs59903549	rs59903549	6	156448341	T	C	0.0206166	Yes	Yes	+
29	rs60198038	rs59903549	6	156455488	T	C	0.0344621	Yes	Yes	+
29	rs60394528	rs59903549	6	156455348	A	C	0.0323971	Yes	Yes	-
29	rs62434777	rs59903549	6	156448855	A	G	0.0480245	Yes	Yes	+
29	rs62434780	rs59903549	6	156450292	T	C	0.0374522	Yes	Yes	+
29	rs62434782	rs59903549	6	156452699	T	G	0.040242	Yes	Yes	-
29	rs62434783	rs59903549	6	156452752	T	G	0.0301268	Yes	Yes	-
29	rs62434784	rs59903549	6	156452799	A	G	0.0388089	Yes	Yes	+
29	rs73788887	rs59903549	6	156463690	T	C	0.0470026	Yes	Yes	-
29	rs7770763	rs59903549	6	156456723	T	C	0.0473436	Yes	Yes	+
30	rs34799296	rs34799296	6	161688959	T	C	0.045432	Yes	Yes	-
31	rs3808352	rs3808352	7	1132153	A	G	0.0364776	Yes	Yes	-/+
32	rs74439139	rs76086831	7	113757643	T	G	0.0288453	Yes	Yes	-
32	rs76086831	rs76086831	7	113771051	A	G	0.018926	Yes	Yes	+
33	rs10239094	rs6968125	7	115053728	T	G	0.00504064	Yes	x	-
33	rs10251192	rs6968125	7	115026459	T	C	0.0075051	Yes	x	-
33	rs10261857	rs6968125	7	114959247	A	G	0.0207311	Yes	x	-
33	rs10808179	rs6968125	7	115069789	A	G	0.00229935	Yes	x	+
33	rs10953781	rs6968125	7	114974695	T	C	0.00926243	Yes	x	-
33	rs11531592	rs6968125	7	115094152	A	C	0.00216675	Yes	x	+
33	rs11561941	rs6968125	7	115097852	A	G	0.00193106	Yes	x	-
33	rs12666306	rs6968125	7	115082406	A	G	0.00372524	Yes	x	+
33	rs12667221	rs6968125	7	115006628	A	C	0.00830613	Yes	Yes	-
33	rs12706031	rs6968125	7	115045712	A	C	0.00651985	Yes	x	+
33	rs1358391	rs6968125	7	115111838	T	G	0.00212371	Yes	x	-
33	rs1358393	rs6968125	7	115086427	T	G	0.00221252	Yes	x	-
33	rs1358394	rs6968125	7	115068713	A	G	0.00517977	Yes	x	+
33	rs1527737	rs6968125	7	115095243	A	G	0.00225974	Yes	x	-
33	rs1527743	rs6968125	7	115029890	A	G	0.00629468	Yes	x	+
33	rs1534373	rs6968125	7	115033079	T	G	0.00680232	Yes	x	+
33	rs17137753	rs6968125	7	115030592	A	G	0.0023457	Yes	x	-
33	rs17296088	rs6968125	7	115112776	A	C	0.00209788	Yes	x	+
33	rs2141233	rs6968125	7	115065555	T	G	0.00471669	Yes	x	+
33	rs2188541	rs6968125	7	114946081	A	G	0.0431948	Yes	x	+
33	rs34562882	rs6968125	7	115090076	A	G	0.00230741	Yes	x	-
33	rs4275159	rs6968125	7	115067269	A	G	0.00231409	Yes	x	-
33	rs4386905	rs6968125	7	115076026	T	C	0.00229665	Yes	x	+
33	rs4730682	rs6968125	7	115104563	T	C	0.00198862	Yes	x	+
33	rs56662562	rs6968125	7	115021945	T	C	0.0032682	Yes	x	-
33	rs59369558	rs6968125	7	115029650	T	C	0.00292434	Yes	x	+
33	rs62474669	rs6968125	7	114963568	T	C	0.0107273	Yes	x	+
33	rs62474673	rs6968125	7	114973194	T	G	0.0088901	Yes	x	+
33	rs62474676	rs6968125	7	114993488	A	G	0.00683662	Yes	x	+
33	rs62474683	rs6968125	7	115020725	A	G	0.00325324	Yes	x	+
33	rs62474713	rs6968125	7	115060209	A	G	0.00216571	Yes	x	-
33	rs62477308	rs6968125	7	114944408	T	C	0.00106576	Yes	Yes	-
33	rs62477310	rs6968125	7	114951541	T	C	0.00134621	Yes	Yes	+
33	rs62477311	rs6968125	7	114952985	A	G	0.00112537	Yes	Yes	+
33	rs6968125	rs6968125	7	114940147	T	C	0.000935842	Yes	Yes	-
33	rs6970620	rs6968125	7	115005659	A	G	0.0121866	Yes	x	+
33	rs73204027	rs6968125	7	115092851	T	C	0.00334542	Yes	Yes	+
33	rs73204028	rs6968125	7	115092852	T	C	0.00365473	Yes	Yes	-
33	rs73204031	rs6968125	7	115094819	T	C	0.00225974	Yes	x	-
33	rs7797141	rs6968125	7	115052164	A	G	0.0265519	x	Yes	+
33	rs7806900	rs6968125	7	115106854	A	G	0.00212737	Yes	x	+
33	rs9641538	rs6968125	7	115031575	A	G	0.00552465	Yes	x	-
34	rs12671608	rs12671608	7	153524115	T	C	0.0174587	Yes	Yes	-
34	rs2538421	rs12671608	7	153522140	A	G	0.0192355	Yes	Yes	+
34	rs58772168	rs12671608	7	153527150	T	C	0.0404914	Yes	Yes	-
34	rs62486223	rs12671608	7	153522077	A	G	0.0254622	Yes	Yes	+
34	rs62486225	rs12671608	7	153526187	A	G	0.0458413	Yes	Yes	-
35	rs9638110	rs9638110	7	157501018	T	C	0.0362427	Yes	Yes	+
36	rs10091386	rs11996727	8	10696620	A	C	0.0464993	Yes	Yes	+
36	rs11996727	rs11996727	8	10691489	T	C	0.0388306	Yes	Yes	-
36	rs4840536	rs4840536	8	10929725	A	G	0.0467166	x	Yes	+
36	rs6601534	rs11996727	8	10691993	A	G	0.0480905	Yes	Yes	+
37	rs111345201	rs78954405	8	76678964	T	C	0.0434216	Yes	Yes	+
37	rs111407479	rs78954405	8	76672616	A	G	0.0443407	Yes	Yes	-
37	rs112294343	rs78954405	8	76680174	A	G	0.0436948	Yes	Yes	-
37	rs112564738	rs78954405	8	76611126	A	G	0.0479192	Yes	Yes	-
37	rs112753086	rs78954405	8	76651009	A	C	0.049637	Yes	Yes	+
37	rs112839134	rs78954405	8	76672370	T	C	0.0420324	Yes	Yes	+
37	rs112980468	rs78954405	8	76686124	T	C	0.0423627	Yes	Yes	+
37	rs113397879	rs78954405	8	76663897	T	C	0.0477877	Yes	Yes	+
37	rs113588369	rs78954405	8	76680096	T	C	0.0436852	Yes	Yes	-
37	rs75786907	rs78954405	8	76659412	A	G	0.048882	Yes	Yes	+
37	rs75831229	rs78954405	8	76690384	A	G	0.0396564	Yes	Yes	+
37	rs76954063	rs78954405	8	76684879	A	G	0.0425298	Yes	Yes	-
37	rs76999588	rs78954405	8	76673204	A	C	0.0444466	Yes	Yes	+
37	rs77479949	rs78954405	8	76656254	A	G	0.0486035	Yes	Yes	+
37	rs77680801	rs78954405	8	76658199	A	G	0.0479552	Yes	Yes	-
37	rs78173958	rs78954405	8	76668626	T	C	0.0474303	Yes	Yes	+
37	rs7827112	rs78954405	8	76678296	A	G	0.0395803	Yes	Yes	-
37	rs78556971	rs78954405	8	76669180	T	G	0.0472255	Yes	Yes	-
37	rs78588965	rs78954405	8	76671052	T	C	0.0446702	Yes	Yes	+
37	rs78777543	rs78954405	8	76657075	A	G	0.0486617	Yes	Yes	-
37	rs78954405	rs78954405	8	76670015	A	G	0.0337883	Yes	Yes	-
37	rs79145108	rs78954405	8	76684858	A	G	0.0426163	Yes	Yes	+
37	rs79176356	rs78954405	8	76669156	T	C	0.0487585	Yes	Yes	-
37	rs79814623	rs78954405	8	76688660	T	C	0.0421329	Yes	Yes	-
37	rs80094578	rs78954405	8	76656568	A	G	0.0486736	Yes	Yes	-
38	rs10103955	rs28825376	8	114705406	T	C	0.0492436	Yes	Yes	-
38	rs10110825	rs28825376	8	114682459	T	C	0.0487074	Yes	Yes	-
38	rs10111038	rs28825376	8	114682648	T	G	0.0493093	Yes	Yes	-
38	rs1596332	rs28825376	8	114707007	T	C	0.0492037	Yes	Yes	-
38	rs28825376	rs28825376	8	114703651	A	C	0.0483502	Yes	Yes	+
38	rs4876517	rs28825376	8	114650771	A	G	0.0491488	Yes	Yes	-
38	rs734622	rs28825376	8	114671682	T	C	0.0496517	Yes	Yes	+
39	rs290618	rs6994458	8	115400419	A	G	0.0497074	Yes	Yes	+
39	rs6994458	rs6994458	8	115727826	T	C	0.0453344	Yes	Yes	-
40	rs1407345	rs543458	9	14063510	A	G	0.0474481	Yes	Yes	-
40	rs1799675	rs543458	9	14068545	T	G	0.0162338	Yes	Yes	-
40	rs513997	rs543458	9	14064502	T	G	0.0254596	Yes	Yes	-
40	rs543458	rs543458	9	14068327	A	C	0.0115324	Yes	Yes	+
40	rs544565	rs543458	9	14068504	T	G	0.0231001	Yes	Yes	-
40	rs564854	rs543458	9	14065522	A	C	0.0171264	Yes	Yes	-
40	rs567563	rs543458	9	14066065	A	G	0.0194351	Yes	Yes	+
40	rs6474808	rs543458	9	14061949	T	C	0.045354	Yes	Yes	-
40	rs6474809	rs543458	9	14068306	T	C	0.0187897	Yes	Yes	-
40	rs716831	rs543458	9	14063294	T	C	0.020255	Yes	Yes	-
41	rs17290816	rs17290816	9	109175575	A	G	0.0273775	Yes	Yes	-
42	rs10118916	rs10118916	9	122672140	A	C	0.0406901	x	Yes	-
42	rs10465137	rs10118916	9	122659596	T	C	0.0468657	x	Yes	+
42	rs12553064	rs10118916	9	122660054	A	C	0.0493529	x	Yes	+
42	rs1333908	rs10118916	9	122673299	T	G	0.0489155	x	Yes	-
42	rs1360692	rs10118916	9	122668048	T	C	0.0473892	x	Yes	+
42	rs1360693	rs10118916	9	122667930	A	G	0.0467256	x	Yes	-
42	rs7020855	rs10118916	9	122665272	A	G	0.0498251	x	Yes	-
42	rs7025421	rs10118916	9	122666288	T	C	0.0499081	x	Yes	+
43	rs10986604	rs10986604	9	127933747	T	C	0.00840163	x	Yes	-
43	rs11789451	rs10986604	9	127825903	A	G	0.0340039	Yes	Yes	-
43	rs185062166	rs10986604	9	127961612	A	G	0.0230014	x	Yes	-
43	rs2807008	rs10986604	9	127986487	A	C	0.0184098	x	Yes	+
43	rs360210	rs10986604	9	127797945	T	C	0.0462145	x	Yes	+
43	rs4837010	rs10986604	9	127923013	T	C	0.0341897	x	Yes	+
43	rs4837011	rs10986604	9	127923014	T	G	0.0366882	x	Yes	-
43	rs4838243	rs10986604	9	127818519	T	C	0.0299012	Yes	Yes	-
43	rs556629350	rs10986604	9	127913980	T	G	0.0127008	x	Yes	+
43	rs6478693	rs10986604	9	127877519	T	C	0.0327926	Yes	Yes	+
44	rs10835372	rs10835372	11	28643913	T	C	0.0498762	Yes	Yes	+
45	rs11030804	rs11030804	11	29788938	T	C	0.0298697	Yes	Yes	-
46	rs10736463	rs7105462	11	112854052	T	C	0.00685236	x	Yes	-
46	rs10789929	rs7105462	11	112830663	T	C	0.00604106	Yes	Yes	+
46	rs10891487	rs7105462	11	112869054	A	G	0.00697328	x	Yes	+
46	rs10891490	rs7105462	11	112885527	T	C	0.0045652	x	Yes	+
46	rs10891492	rs7105462	11	112909745	T	C	0.00624685	Yes	Yes	+
46	rs1892981	rs7105462	11	112899633	T	C	0.00505417	Yes	Yes	+
46	rs1892983	rs7105462	11	112899214	T	C	0.00474199	Yes	Yes	-
46	rs1940697	rs7105462	11	112876886	A	G	0.00487847	x	Yes	+
46	rs1940701	rs7105462	11	112869404	T	C	0.00619132	x	Yes	-
46	rs1940702	rs7105462	11	112867061	A	G	0.00569724	x	Yes	-
46	rs1940713	rs7105462	11	112906285	T	C	0.0052902	Yes	Yes	-
46	rs1940714	rs7105462	11	112906391	T	C	0.00530023	Yes	Yes	-
46	rs1940716	rs7105462	11	112860288	A	G	0.00592539	x	Yes	-
46	rs1940718	rs7105462	11	112859867	T	C	0.00570537	x	Yes	+
46	rs1940720	rs7105462	11	112857202	A	G	0.00570831	x	Yes	-
46	rs1940724	rs7105462	11	112852946	A	G	0.00660174	x	Yes	-
46	rs1940725	rs7105462	11	112852759	T	C	0.00672796	x	Yes	-
46	rs1940726	rs7105462	11	112852611	T	G	0.00604136	x	Yes	-
46	rs1940727	rs7105462	11	112852588	T	G	0.00632662	x	Yes	+
46	rs1940728	rs7105462	11	112852195	T	G	0.00682096	x	Yes	+
46	rs1940729	rs7105462	11	112852192	T	C	0.00733865	x	Yes	-
46	rs1940733	rs7105462	11	112892274	A	G	0.00512728	x	Yes	+
46	rs1954826	rs7105462	11	112853012	A	G	0.00670966	x	Yes	-
46	rs2155281	rs7105462	11	112838338	A	G	0.00517246	Yes	Yes	+
46	rs2155292	rs7105462	11	112910783	A	G	0.00526917	Yes	Yes	-
46	rs2155646	rs7105462	11	112912811	T	C	0.00586329	Yes	Yes	-
46	rs2186709	rs7105462	11	112843616	A	G	0.00778115	Yes	Yes	+
46	rs2186874	rs7105462	11	112912724	T	C	0.00613365	Yes	Yes	-
46	rs2212449	rs7105462	11	112852032	T	G	0.00616609	x	Yes	+
46	rs2298526	rs7105462	11	112852464	T	C	0.00553661	x	Yes	-
46	rs3802847	rs7105462	11	112912303	T	C	0.00487905	Yes	Yes	-
46	rs3802848	rs7105462	11	112912387	A	C	0.00531724	Yes	Yes	-
46	rs3802850	rs7105462	11	112912518	A	C	0.00635028	Yes	Yes	-
46	rs4144892	rs7105462	11	112866456	T	C	0.00583261	x	Yes	+
46	rs4381397	rs7105462	11	112866269	T	C	0.00612658	x	Yes	-
46	rs4439550	rs7105462	11	112853538	A	G	0.00669445	x	Yes	+
46	rs4439551	rs7105462	11	112865906	T	C	0.0310564	x	Yes	-
46	rs4466874	rs7105462	11	112861434	T	C	0.00527493	x	Yes	-
46	rs4479020	rs7105462	11	112861443	A	G	0.00514059	x	Yes	+
46	rs4480572	rs7105462	11	112905776	T	C	0.00543449	Yes	Yes	+
46	rs4937872	rs7105462	11	112827715	A	G	0.00640014	Yes	Yes	-
46	rs6589353	rs7105462	11	112854935	A	G	0.00568457	Yes	Yes	+
46	rs7105462	rs7105462	11	112912048	A	G	0.00412232	x	Yes	-
46	rs7106434	rs7105462	11	112860579	T	C	0.00479458	x	Yes	+
46	rs7108081	rs7105462	11	112865115	A	G	0.00576291	x	Yes	-
46	rs7110863	rs7105462	11	112843138	A	G	0.0062875	Yes	Yes	-
46	rs7111153	rs7105462	11	112834153	T	C	0.00962391	Yes	Yes	-
46	rs7113596	rs7105462	11	112883761	A	C	0.00511728	x	Yes	+
46	rs7115165	rs7105462	11	112862587	T	C	0.0058099	x	Yes	-
46	rs7118907	rs7105462	11	112878254	A	C	0.00498067	x	Yes	+
46	rs7126748	rs7105462	11	112842976	T	C	0.00855222	Yes	Yes	-
46	rs7127528	rs7105462	11	112904479	T	C	0.00556649	Yes	Yes	+
46	rs7127930	rs7105462	11	112874645	A	C	0.00491336	x	Yes	+
46	rs7128314	rs7105462	11	112905039	T	C	0.00553054	Yes	Yes	+
46	rs7128648	rs7105462	11	112905129	A	G	0.00496471	Yes	Yes	+
46	rs723599	rs7105462	11	112872305	A	G	0.00518547	x	Yes	-
46	rs7926312	rs7105462	11	112893856	A	G	0.00617908	x	Yes	-
46	rs7935745	rs7105462	11	112906804	A	G	0.00531085	Yes	Yes	-
46	rs7937151	rs7105462	11	112835024	T	G	0.00434944	Yes	Yes	-
46	rs7938812	rs7105462	11	112911004	T	G	0.00550676	Yes	Yes	-
46	rs7942723	rs7105462	11	112911839	T	G	0.00538339	Yes	Yes	-
46	rs7945073	rs7105462	11	112903595	A	G	0.00569344	Yes	Yes	+
46	rs7947502	rs7105462	11	112909396	T	C	0.00460105	x	Yes	-
46	rs7948327	rs7105462	11	112910077	A	C	0.00633908	Yes	Yes	+
46	rs7948789	rs7105462	11	112839532	A	G	0.00469196	Yes	Yes	-
46	rs7950836	rs7105462	11	112856137	T	C	0.00586369	x	Yes	-
46	rs9919557	rs7105462	11	112877408	T	C	0.00525894	x	Yes	-
46	rs9919620	rs7105462	11	112892570	A	G	0.00499676	x	Yes	+
46	rs9919670	rs7105462	11	112877304	A	G	0.00442233	x	Yes	+
46	rs999851	rs7105462	11	112889846	A	G	0.00507763	x	Yes	-
47	rs1076560	rs12798900	11	113283688	A	C	0.0021478	Yes	Yes	+
47	rs1076563	rs12798900	11	113295909	A	C	0.000138554	x	Yes	+
47	rs1078	rs12798900	11	113241877	T	C	0.0294912	Yes	Yes	-
47	rs10789942	rs12798900	11	113236199	A	G	0.0390329	Yes	Yes	+
47	rs1079594	rs12798900	11	113282812	A	C	0.00253645	Yes	Yes	-
47	rs1079595	rs12798900	11	113282669	A	C	0.00224315	Yes	Yes	-
47	rs1079596	rs12798900	11	113296619	T	C	0.00182792	Yes	Yes	+
47	rs1079597	rs12798900	11	113296286	T	C	0.00197482	Yes	Yes	+
47	rs1079598	rs12798900	11	113296274	A	G	0.00183724	Yes	Yes	-
47	rs1079727	rs12798900	11	113289182	T	C	0.00240436	Yes	Yes	-
47	rs10891538	rs12798900	11	113224017	T	C	0.0463891	Yes	Yes	-
47	rs10891540	rs12798900	11	113239082	A	G	0.0337527	Yes	Yes	-
47	rs10891544	rs12798900	11	113256152	A	C	0.0160617	Yes	Yes	-
47	rs10891547	rs12798900	11	113267218	A	C	0.00266595	x	Yes	-
47	rs10891548	rs12798900	11	113267259	A	G	0.00272834	x	Yes	-
47	rs10891549	rs12798900	11	113278447	T	C	0.00416335	x	Yes	+
47	rs1107162	rs12798900	11	113289037	A	G	0.000144239	x	Yes	-
47	rs1116313	rs12798900	11	113296107	A	G	0.00013586	x	Yes	+
47	rs11214582	rs12798900	11	113218050	T	C	0.0453225	Yes	Yes	-
47	rs11214583	rs12798900	11	113224404	A	G	0.0491933	Yes	Yes	+
47	rs11214587	rs12798900	11	113232422	T	G	0.0329205	Yes	Yes	+
47	rs11214589	rs12798900	11	113245048	A	G	0.0374151	Yes	Yes	-
47	rs11214594	rs12798900	11	113259332	A	G	0.00499244	x	Yes	-
47	rs11214595	rs12798900	11	113259658	T	G	0.00601108	x	Yes	-
47	rs11214599	rs12798900	11	113271360	T	C	0.00210797	Yes	Yes	+
47	rs11214601	rs12798900	11	113272762	T	C	0.00204658	Yes	Yes	+
47	rs11214603	rs12798900	11	113279922	A	G	0.00304071	x	Yes	-
47	rs11214605	rs12798900	11	113300601	T	C	0.000113515	x	Yes	-
47	rs11214608	rs12798900	11	113315355	T	C	0.00695037	Yes	Yes	-
47	rs1124491	rs12798900	11	113282090	A	G	0.00327245	Yes	Yes	+
47	rs1125393	rs12798900	11	113297349	T	C	0.00202615	Yes	Yes	+
47	rs1125394	rs12798900	11	113297185	T	C	0.00168091	Yes	Yes	-
47	rs11493880	rs12798900	11	113225144	T	C	0.0451224	Yes	Yes	-
47	rs11604671	rs12798900	11	113268059	A	G	0.00298491	x	Yes	-
47	rs11608185	rs12798900	11	113294976	T	C	0.000149234	x	Yes	+
47	rs12360992	rs12798900	11	113262900	A	C	0.00509804	x	Yes	+
47	rs12363125	rs12798900	11	113285916	T	C	0.000137271	x	Yes	-
47	rs12364051	rs12798900	11	113305314	A	G	0.000391893	x	Yes	+
47	rs12420205	rs2514218	11	113394035	T	C	0.00430501	Yes	Yes	+
47	rs12798900	rs12798900	11	113298996	T	G	0.000109137	x	Yes	-
47	rs12800853	rs12798900	11	113302514	T	C	0.000145164	x	Yes	-
47	rs12804573	rs12798900	11	113241726	A	G	0.029307	Yes	Yes	-
47	rs1554929	rs12798900	11	113278764	T	C	0.00322767	x	Yes	-
47	rs17600713	rs12798900	11	113259947	A	G	0.00618172	x	Yes	-
47	rs17602038	rs2514218	11	113364691	T	C	0.000148004	x	x	+
47	rs1800497	rs7118900	11	113270828	A	G	0.00737844	Yes	Yes	+
47	rs1800498	rs12798900	11	113291588	A	G	0.000179414	x	Yes	-
47	rs1962262	rs12798900	11	113294179	A	G	0.00195998	Yes	Yes	+
47	rs2075654	rs12798900	11	113289066	T	C	0.00262355	Yes	Yes	+
47	rs2155463	rs12798900	11	113242301	T	C	0.0326671	Yes	Yes	+
47	rs2186799	rs12798900	11	113242533	T	G	0.0293994	Yes	Yes	-
47	rs2186800	rs12798900	11	113242860	A	G	0.0442277	Yes	Yes	-
47	rs2242591	rs12798900	11	113279921	T	C	0.00294464	Yes	Yes	+
47	rs2242593	rs12798900	11	113276265	T	C	0.00255115	Yes	Yes	-
47	rs2283265	rs12798900	11	113285536	A	C	0.00255001	Yes	Yes	+
47	rs2471851	rs12798900	11	113301069	A	C	0.00240061	Yes	Yes	-
47	rs2471857	rs12798900	11	113298339	T	C	0.00202394	Yes	Yes	+
47	rs2511520	rs12798900	11	113274771	T	C	0.00203085	Yes	Yes	+
47	rs2514218	rs2514218	11	113392994	T	C	8.80454e-05	x	Yes	-
47	rs2734831	rs12798900	11	113293596	T	G	0.000152683	x	Yes	+
47	rs2734832	rs12798900	11	113293501	A	G	0.00014527	x	Yes	+
47	rs2734833	rs12798900	11	113292920	A	G	0.000159871	x	Yes	-
47	rs2734835	rs12798900	11	113291343	T	G	0.000194418	x	Yes	+
47	rs2734836	rs12798900	11	113291239	T	C	0.00248323	Yes	Yes	+
47	rs2734837	rs12798900	11	113286829	T	C	0.00013469	x	Yes	-
47	rs2734838	rs12798900	11	113286501	A	G	0.000172594	x	Yes	+
47	rs2734839	rs12798900	11	113286490	T	C	0.000140044	x	Yes	-
47	rs2734849	rs12798900	11	113270160	A	G	0.0035396	x	Yes	+
47	rs34216353	rs2514218	11	113386391	T	C	0.00545579	Yes	Yes	-
47	rs34601878	rs12798900	11	113260898	A	G	0.00591873	x	Yes	-
47	rs34863235	rs7118900	11	113266679	T	C	0.0139295	Yes	Yes	+
47	rs35023999	rs12798900	11	113266411	A	C	0.00270494	x	Yes	+
47	rs35738585	rs2514218	11	113386347	T	G	0.0054845	Yes	Yes	+
47	rs4245146	rs2514218	11	113317973	T	C	0.0381569	Yes	Yes	-
47	rs4245147	rs2514218	11	113318007	T	C	0.0401788	Yes	Yes	+
47	rs4245150	rs2514218	11	113364647	T	G	0.000177732	x	x	+
47	rs4245154	rs2514218	11	113388674	A	G	0.00541889	Yes	Yes	+
47	rs4274224	rs2514218	11	113319452	A	G	0.0420787	Yes	Yes	+
47	rs4370966	rs12798900	11	113231691	A	G	0.0293393	Yes	Yes	-
47	rs4438071	rs12798900	11	113231614	T	C	0.027817	Yes	Yes	-
47	rs4479021	rs2514218	11	113383394	A	G	0.00487812	Yes	Yes	-
47	rs4534613	rs2514218	11	113386043	A	C	0.00533222	Yes	Yes	+
47	rs4587762	rs12798900	11	113306893	A	G	0.000592228	x	Yes	-
47	rs4936271	rs2514218	11	113318705	T	C	0.037345	Yes	Yes	-
47	rs4936272	rs2514218	11	113318907	T	C	0.0319871	Yes	Yes	-
47	rs4936275	rs2514218	11	113365084	T	C	0.000158779	x	x	+
47	rs4938017	rs12798900	11	113303929	T	C	0.000344621	x	Yes	+
47	rs4938021	rs2514218	11	113364803	T	C	0.000159509	x	x	+
47	rs4938023	rs2514218	11	113374847	T	G	0.000188532	x	Yes	-
47	rs61902811	rs2514218	11	113370758	A	G	0.000189474	x	Yes	-
47	rs61902812	rs2514218	11	113374420	A	C	0.000156895	x	Yes	-
47	rs6277	rs12798900	11	113283459	A	G	0.0023752	x	Yes	-
47	rs6278	rs12798900	11	113280724	A	C	0.00313053	Yes	Yes	+
47	rs6589379	rs2514218	11	113374567	T	G	0.000286255	x	Yes	+
47	rs6589381	rs2514218	11	113378952	A	C	0.00453893	Yes	Yes	-
47	rs7103679	rs12798900	11	113303674	T	C	0.00195632	Yes	Yes	+
47	rs7107293	rs2514218	11	113384111	A	G	0.00548346	Yes	Yes	-
47	rs7111031	rs2514218	11	113377488	A	C	0.000212195	x	Yes	+
47	rs7116782	rs12798900	11	113250938	A	G	0.0175632	Yes	Yes	+
47	rs7118900	rs7118900	11	113266821	A	G	0.00703612	Yes	Yes	+
47	rs7122246	rs12798900	11	113304457	A	G	0.000347503	x	Yes	-
47	rs7131440	rs12798900	11	113299910	T	C	0.000128241	x	Yes	-
47	rs7131465	rs12798900	11	113300022	A	C	0.000139583	x	Yes	+
47	rs7131627	rs12798900	11	113299829	A	G	0.00012691	x	Yes	-
47	rs7131681	rs12798900	11	113300052	T	C	0.000137437	x	Yes	-
47	rs7350522	rs12798900	11	113305203	T	G	0.00202078	Yes	Yes	+
47	rs754672	rs12798900	11	113249136	T	C	0.0242966	Yes	Yes	-
47	rs7934649	rs2514218	11	113372671	T	C	0.000187284	x	Yes	+
47	rs7939992	rs12798900	11	113229665	T	C	0.0490476	Yes	Yes	+
47	rs7949802	rs2514218	11	113381832	T	C	0.00538478	Yes	Yes	-
47	rs877137	rs12798900	11	113256330	T	C	0.0157863	Yes	Yes	-
48	rs11047241	rs11047241	12	24210719	T	C	0.0226791	Yes	Yes	-
48	rs12298757	rs11047241	12	24224544	T	G	0.0450694	Yes	Yes	-
48	rs12828700	rs11047241	12	24213548	T	C	0.0442496	Yes	Yes	+
48	rs17485141	rs11047241	12	24213634	T	C	0.0459641	Yes	Yes	-
48	rs7964057	rs11047241	12	24216722	A	G	0.0495336	Yes	Yes	+
49	rs10779007	rs10779007	12	83878615	T	C	0.0405247	Yes	Yes	+/-
49	rs11115882	rs10779007	12	83871007	A	G	0.0435039	Yes	Yes	-/+
50	rs1010345	rs7337506	13	96968023	A	G	0.035895	Yes	Yes	-
50	rs12583996	rs7337506	13	96991702	A	G	0.0496487	Yes	Yes	+
50	rs12866328	rs7337506	13	96986656	A	G	0.0465298	Yes	Yes	+
50	rs12871045	rs7337506	13	96971721	T	G	0.0356235	Yes	Yes	+
50	rs12871890	rs7337506	13	96987910	A	G	0.04645	Yes	Yes	+
50	rs1475296	rs7337506	13	97004273	T	C	0.0432682	Yes	Yes	-
50	rs1925099	rs7337506	13	97024298	T	C	0.0277966	Yes	Yes	+
50	rs1925100	rs7337506	13	97024150	A	G	0.0288302	Yes	Yes	+
50	rs1925104	rs7337506	13	97019647	T	G	0.0441675	Yes	Yes	+
50	rs1925107	rs7337506	13	97010667	T	C	0.0319785	Yes	Yes	-
50	rs1925115	rs7337506	13	96958817	A	G	0.0376555	Yes	Yes	+
50	rs1925119	rs7337506	13	96939586	A	C	0.0454063	Yes	Yes	+
50	rs2389631	rs7337506	13	96932868	A	C	0.0385509	Yes	Yes	-
50	rs34818702	rs7337506	13	96977512	A	G	0.0481487	Yes	Yes	-
50	rs35092596	rs7337506	13	96977392	T	G	0.0469535	Yes	Yes	-
50	rs4771932	rs7337506	13	96950542	A	G	0.0370141	Yes	Yes	+
50	rs61966957	rs7337506	13	97015365	T	C	0.0456113	Yes	Yes	+
50	rs7320054	rs7337506	13	96976392	A	G	0.049382	Yes	Yes	-
50	rs7323056	rs7337506	13	96956200	A	C	0.0367527	Yes	Yes	+
50	rs7323705	rs7337506	13	97029792	A	G	0.0294824	Yes	Yes	+
50	rs7324569	rs7337506	13	97029655	T	C	0.0300956	Yes	Yes	-
50	rs7328493	rs7337506	13	97000498	T	G	0.0482363	Yes	Yes	-
50	rs7337506	rs7337506	13	96936978	A	G	0.0241943	Yes	Yes	+
50	rs7981845	rs7337506	13	96942533	T	C	0.0312727	Yes	Yes	+
50	rs7981931	rs7337506	13	96934176	T	C	0.0244782	Yes	Yes	+
50	rs7982697	rs7337506	13	96988839	A	G	0.0469583	Yes	Yes	-
50	rs7991843	rs7337506	13	96970986	T	C	0.0338257	Yes	Yes	+
50	rs7996549	rs7337506	13	96975175	T	G	0.0341828	Yes	Yes	-
50	rs927710	rs7337506	13	97004796	T	G	0.046336	Yes	Yes	-
50	rs9554338	rs7337506	13	96966314	A	G	0.0368443	Yes	Yes	+
50	rs9554340	rs7337506	13	96974112	T	C	0.0357464	Yes	Yes	-
50	rs9554349	rs7337506	13	97023829	T	C	0.028679	Yes	Yes	+
50	rs9556550	rs7337506	13	96947034	A	C	0.04326	Yes	Yes	-
50	rs9556554	rs7337506	13	96960146	T	C	0.0359958	Yes	Yes	+
50	rs9556555	rs7337506	13	96961482	A	G	0.0389138	Yes	Yes	-
50	rs9556559	rs7337506	13	96974352	T	C	0.035354	Yes	Yes	+
50	rs9556567	rs7337506	13	96985036	A	G	0.0457134	Yes	Yes	-
50	rs9556575	rs7337506	13	97013178	T	C	0.0441352	Yes	Yes	+
50	rs9556576	rs7337506	13	97013688	A	G	0.0471486	Yes	Yes	-
51	rs11157240	rs11157240	14	42051747	A	G	0.0454851	Yes	Yes	+
52	rs1025142	rs962949	15	47684932	A	C	0.016098	Yes	Yes	-
52	rs1025143	rs962949	15	47685059	T	C	0.0178285	Yes	Yes	-
52	rs1025144	rs962949	15	47685080	A	G	0.016337	Yes	Yes	-
52	rs1025145	rs962949	15	47685306	A	G	0.00550799	Yes	Yes	-
52	rs117815047	rs72733826	15	47731407	A	G	0.0390448	Yes	Yes	+
52	rs11855468	rs72733826	15	47764845	A	G	0.0328505	Yes	Yes	-
52	rs12904595	rs962949	15	47679524	T	C	0.0121459	Yes	Yes	-
52	rs12907546	rs962949	15	47684280	A	G	0.0127778	Yes	Yes	+
52	rs12910487	rs962949	15	47681390	T	C	0.0145122	Yes	Yes	+
52	rs12910916	rs962949	15	47675655	T	C	0.0114907	Yes	Yes	+
52	rs2132660	rs962949	15	47679807	A	G	0.0134122	Yes	Yes	-
52	rs2132661	rs962949	15	47679726	A	G	0.012036	Yes	Yes	-
52	rs281264	rs962949	15	47675569	A	G	0.0345211	Yes	Yes	-
52	rs281265	rs962949	15	47675602	A	C	0.0345083	Yes	Yes	-
52	rs281286	rs962949	15	47681250	T	C	0.0173795	Yes	Yes	-
52	rs281287	rs962949	15	47681552	A	G	0.0186591	Yes	Yes	-
52	rs281289	rs962949	15	47682079	A	G	0.017182	Yes	Yes	-
52	rs281291	rs962949	15	47682428	A	G	0.017263	Yes	Yes	-
52	rs281293	rs962949	15	47683333	A	G	0.0172679	Yes	Yes	+
52	rs281296	rs962949	15	47685010	A	G	0.0183343	Yes	Yes	+
52	rs34488670	rs962949	15	47684936	T	C	0.0101108	Yes	Yes	-
52	rs34794623	rs962949	15	47680801	A	C	0.00975082	Yes	Yes	+
52	rs35175834	rs962949	15	47680815	A	G	0.00961355	Yes	Yes	+
52	rs35473814	rs962949	15	47680662	A	G	0.00986218	Yes	Yes	+
52	rs35534970	rs962949	15	47675585	A	G	0.0115731	Yes	Yes	+
52	rs4338738	rs962949	15	47684530	A	G	0.0167734	Yes	Yes	+
52	rs4404005	rs962949	15	47684196	T	C	0.0167914	Yes	Yes	+
52	rs4485292	rs962949	15	47678898	A	G	0.0105916	Yes	Yes	+
52	rs4497626	rs962949	15	47684508	A	G	0.016426	Yes	Yes	-
52	rs4511474	rs962949	15	47684680	A	G	0.0169421	Yes	Yes	+
52	rs6493274	rs962949	15	47676489	A	C	0.0105953	Yes	Yes	-
52	rs7166534	rs962949	15	47678132	T	C	0.0105169	Yes	Yes	-
52	rs7174904	rs962949	15	47676110	T	C	0.0111819	Yes	Yes	+
52	rs7174964	rs962949	15	47676228	A	C	0.0110501	Yes	Yes	-
52	rs7175414	rs962949	15	47676200	A	G	0.0106727	Yes	Yes	+
52	rs72733826	rs72733826	15	47717163	A	G	0.0294621	Yes	Yes	+
52	rs8032333	rs962949	15	47680567	A	G	0.0109934	Yes	Yes	-
52	rs8033799	rs962949	15	47681384	A	C	0.0141529	Yes	Yes	-
52	rs8034190	rs962949	15	47681367	A	G	0.0166826	Yes	Yes	+
52	rs8040191	rs962949	15	47676716	T	C	0.0107885	Yes	Yes	+
52	rs8040226	rs962949	15	47676830	A	G	0.0106764	Yes	Yes	-
52	rs8041603	rs962949	15	47676855	T	C	0.0106176	Yes	Yes	-
52	rs962949	rs962949	15	47685378	A	G	0.00531755	Yes	Yes	-
53	rs4702	rs4702	15	91426560	A	G	0.0148028	Yes	Yes	-
54	rs35105141	rs9939774	16	30057148	T	C	0.0491026	Yes	Yes	+/-
54	rs9939774	rs9939774	16	30068354	T	C	0.0459395	Yes	Yes	+/-
55	rs56342456	rs56342456	16	54216420	T	C	0.0492276	Yes	Yes	-
56	rs12934766	rs12934766	16	89144907	T	C	0.01787	Yes	Yes	+
57	rs10445361	rs56305452	17	65962238	T	G	0.0374305	x	Yes	-
57	rs11079706	rs56305452	17	65835470	T	G	0.0376824	x	Yes	+
57	rs11079707	rs56305452	17	65835617	A	G	0.0378509	x	Yes	+
57	rs11079709	rs56305452	17	65853363	T	C	0.0400264	x	Yes	+
57	rs11867401	rs56305452	17	65947970	A	G	0.0367028	x	Yes	-
57	rs11867517	rs56305452	17	65875326	T	C	0.0416463	x	Yes	+
57	rs11867618	rs56305452	17	65875587	A	G	0.0189492	Yes	Yes	+
57	rs11869819	rs56305452	17	65868669	A	C	0.043369	x	Yes	-
57	rs11870068	rs56305452	17	65944515	A	C	0.0269172	x	Yes	-
57	rs12449312	rs56305452	17	65829358	A	C	0.0301203	x	Yes	-
57	rs12449442	rs56305452	17	65947640	A	G	0.034972	x	Yes	+
57	rs12450363	rs56305452	17	65840108	T	C	0.0324075	x	Yes	-
57	rs12450907	rs56305452	17	65870644	T	G	0.04352	x	Yes	-
57	rs12451511	rs56305452	17	65874861	T	G	0.04458	x	Yes	-
57	rs12451707	rs56305452	17	65871598	A	G	0.043354	x	Yes	+
57	rs12451721	rs56305452	17	65939075	A	G	0.0286143	x	Yes	+
57	rs12452511	rs56305452	17	65832576	A	G	0.0413464	x	Yes	-
57	rs12452823	rs56305452	17	65885783	A	G	0.0378847	x	Yes	+
57	rs12600941	rs56305452	17	65918807	A	G	0.0343083	x	Yes	-
57	rs12601759	rs56305452	17	65955284	A	G	0.0266275	x	Yes	-
57	rs12601919	rs56305452	17	65825374	A	G	0.036636	x	Yes	-
57	rs12601921	rs56305452	17	65825354	T	C	0.0389821	x	Yes	+
57	rs12602556	rs56305452	17	65826861	A	G	0.040962	x	Yes	-
57	rs12602655	rs56305452	17	65909442	A	G	0.0368371	x	Yes	-
57	rs12602912	rs56305452	17	65870073	T	C	0.0437773	x	Yes	+
57	rs12603589	rs56305452	17	65825248	T	C	0.0348182	x	Yes	-
57	rs12752	rs56305452	17	66031900	T	C	0.0409177	x	Yes	-
57	rs12943289	rs56305452	17	66085566	A	G	0.0439323	x	Yes	+
57	rs1966410	rs56305452	17	65837215	T	C	0.0310376	x	Yes	-
57	rs1976052	rs56305452	17	65830578	T	C	0.0343469	x	Yes	+
57	rs1976054	rs56305452	17	65833224	T	G	0.0297693	x	Yes	-
57	rs2046323	rs56305452	17	65849927	T	G	0.0398453	x	Yes	-
57	rs2052187	rs56305452	17	65834737	T	C	0.0305561	x	Yes	-
57	rs2128792	rs56305452	17	65857177	T	C	0.0409279	x	Yes	+
57	rs2365466	rs56305452	17	65841129	A	G	0.0334044	x	Yes	+
57	rs2365468	rs56305452	17	65841318	T	C	0.0321251	x	Yes	+
57	rs2365764	rs56305452	17	65857714	A	G	0.0407025	x	Yes	+
57	rs28592929	rs56305452	17	66052734	T	C	0.0436393	Yes	Yes	+
57	rs28850355	rs56305452	17	66064397	T	C	0.0289647	Yes	Yes	-
57	rs3206817	rs56305452	17	65892834	A	G	0.0387314	x	Yes	-
57	rs34843489	rs56305452	17	66053331	T	C	0.047043	Yes	Yes	-
57	rs34872586	rs56305452	17	65863466	T	C	0.0418515	x	Yes	-
57	rs34937122	rs56305452	17	66075877	A	G	0.0370287	x	Yes	-
57	rs35453056	rs56305452	17	66039668	A	G	0.0399799	x	Yes	+
57	rs35594666	rs56305452	17	66039618	A	G	0.0480151	x	Yes	-
57	rs3890640	rs56305452	17	66053028	T	C	0.0436795	Yes	Yes	-
57	rs3935969	rs56305452	17	65881959	A	G	0.0378944	x	Yes	-
57	rs4271626	rs56305452	17	65930133	A	G	0.0304897	x	Yes	+
57	rs4318247	rs56305452	17	65882172	A	G	0.0428877	x	Yes	-
57	rs4569324	rs56305452	17	65872750	T	C	0.0434133	x	Yes	+
57	rs4638	rs56305452	17	66039350	A	G	0.0409337	x	Yes	+
57	rs4790905	rs56305452	17	65863350	A	C	0.0351766	x	Yes	+
57	rs4790908	rs56305452	17	65852907	T	G	0.0333581	x	Yes	-
57	rs4790941	rs56305452	17	65977132	A	G	0.0486859	x	Yes	+
57	rs4790973	rs56305452	17	65951133	T	C	0.031739	x	Yes	+
57	rs4790981	rs56305452	17	65921834	A	G	0.0313509	x	Yes	-
57	rs4791046	rs56305452	17	65851973	A	G	0.0367308	x	Yes	+
57	rs4791048	rs56305452	17	65848994	A	G	0.0294471	x	Yes	+
57	rs4791212	rs56305452	17	65975385	T	C	0.0419059	x	Yes	+
57	rs4791295	rs56305452	17	65997317	A	G	0.0411001	x	Yes	+
57	rs4791299	rs56305452	17	65930937	A	G	0.0349318	x	Yes	-
57	rs4791300	rs56305452	17	65930772	A	G	0.042047	x	Yes	-
57	rs55896768	rs56305452	17	65913358	T	C	0.0380216	x	Yes	-
57	rs55939964	rs56305452	17	65869297	A	G	0.0434866	x	Yes	+
57	rs56148300	rs56305452	17	65892752	T	C	0.0433787	x	Yes	-
57	rs56305452	rs56305452	17	65990500	A	C	0.0161302	x	Yes	-
57	rs56393562	rs56305452	17	65933918	T	C	0.0332905	x	Yes	+
57	rs56404791	rs56305452	17	65893019	T	G	0.0443936	x	Yes	-
57	rs58122682	rs56305452	17	65876915	T	C	0.0392084	x	Yes	-
57	rs58141639	rs56305452	17	65864902	T	C	0.0425178	x	Yes	+
57	rs58551145	rs56305452	17	65837235	A	G	0.0365384	x	Yes	-
57	rs59950564	rs56305452	17	65860859	A	G	0.0414845	x	Yes	-
57	rs59956089	rs56305452	17	65960854	T	C	0.0387713	x	Yes	-
57	rs60432293	rs56305452	17	65860407	T	C	0.0346367	x	Yes	-
57	rs61067468	rs56305452	17	65866035	A	G	0.0326964	x	Yes	+
57	rs62084208	rs56305452	17	65827443	T	C	0.0461082	x	Yes	+
57	rs62084210	rs56305452	17	65828710	A	G	0.0354064	x	Yes	-
57	rs62084212	rs56305452	17	65840244	A	G	0.0371952	x	Yes	+
57	rs62084213	rs56305452	17	65842016	A	G	0.0384036	x	Yes	-
57	rs62084234	rs56305452	17	65847060	A	G	0.0399081	x	Yes	-
57	rs62084235	rs56305452	17	65853437	T	C	0.0401365	x	Yes	+
57	rs62084240	rs56305452	17	65859233	A	C	0.0368288	x	Yes	+
57	rs62084247	rs56305452	17	65872903	T	C	0.0449648	x	Yes	+
57	rs62084248	rs56305452	17	65874541	T	C	0.0436361	x	Yes	+
57	rs62084249	rs56305452	17	65874998	A	G	0.044116	x	Yes	-
57	rs62084251	rs56305452	17	65878736	A	G	0.0403939	x	Yes	+
57	rs62084675	rs56305452	17	66027025	A	G	0.0424662	x	Yes	+
57	rs62084679	rs56305452	17	66030093	A	G	0.041882	x	Yes	-
57	rs62084683	rs56305452	17	66031725	A	G	0.0458045	x	Yes	+
57	rs62084693	rs56305452	17	66036110	T	C	0.0430257	x	Yes	-
57	rs62084701	rs56305452	17	66042238	T	C	0.0415849	x	Yes	-
57	rs62084702	rs56305452	17	66043157	T	C	0.0431882	x	Yes	-
57	rs62084704	rs56305452	17	66045029	A	G	0.0433415	x	Yes	-
57	rs62084734	rs56305452	17	66056197	T	C	0.0401507	Yes	Yes	+
57	rs62084738	rs56305452	17	66059780	T	C	0.0409548	Yes	Yes	-
57	rs62084741	rs56305452	17	66062660	T	C	0.0449582	Yes	Yes	-
57	rs62084742	rs56305452	17	66075531	A	G	0.0363228	x	Yes	-
57	rs62084747	rs56305452	17	66079619	T	C	0.0400099	x	Yes	-
57	rs62084748	rs56305452	17	66080225	T	C	0.0370017	x	Yes	-
57	rs62084750	rs56305452	17	66085208	T	C	0.0450564	x	Yes	-
57	rs62084759	rs56305452	17	66097292	A	G	0.0476252	x	Yes	+
57	rs62085991	rs56305452	17	65920508	A	G	0.03449	x	Yes	+
57	rs62085993	rs56305452	17	65923152	T	C	0.0312968	x	Yes	-
57	rs62086043	rs56305452	17	65968003	A	G	0.0406948	x	Yes	-
57	rs62086044	rs56305452	17	65970837	T	G	0.0419541	x	Yes	+
57	rs62086045	rs56305452	17	65973731	A	G	0.0341512	x	Yes	+
57	rs62086889	rs56305452	17	66000603	T	C	0.0286778	x	Yes	+
57	rs6504542	rs56305452	17	65836642	T	C	0.0275443	x	Yes	-
57	rs6504543	rs56305452	17	65837659	T	C	0.0345437	x	Yes	-
57	rs6504545	rs56305452	17	65880367	A	G	0.0353722	x	Yes	-
57	rs6504546	rs56305452	17	65880385	A	C	0.0370499	x	Yes	-
57	rs6504548	rs56305452	17	65886048	T	C	0.0400331	x	Yes	-
57	rs6504549	rs56305452	17	65888784	A	G	0.041216	x	Yes	-
57	rs6504555	rs56305452	17	65940727	A	G	0.0301317	x	Yes	+
57	rs6504568	rs56305452	17	65999648	T	C	0.035003	x	Yes	-
57	rs6504574	rs56305452	17	66023011	A	G	0.0416869	x	Yes	-
57	rs6504576	rs56305452	17	66034476	T	C	0.0426895	x	Yes	-
57	rs6504578	rs56305452	17	66057966	A	G	0.0427321	Yes	Yes	-
57	rs7208663	rs56305452	17	65885171	T	C	0.0374858	x	Yes	-
57	rs7208909	rs56305452	17	65833546	T	C	0.0304301	x	Yes	-
57	rs7210027	rs56305452	17	65977053	T	C	0.0493838	x	Yes	-
57	rs7211282	rs56305452	17	66024595	A	G	0.0412986	x	Yes	-
57	rs7212293	rs56305452	17	65847325	A	G	0.0343449	x	Yes	-
57	rs7213292	rs56305452	17	65880443	A	G	0.0405875	x	Yes	-
57	rs7214869	rs56305452	17	66032257	T	C	0.043975	x	Yes	-
57	rs7216064	rs56305452	17	65898809	A	G	0.0363108	x	Yes	+
57	rs7218014	rs56305452	17	65832016	T	C	0.0321929	x	Yes	-
57	rs7221651	rs56305452	17	65832390	A	G	0.0294266	x	Yes	+
57	rs7223643	rs56305452	17	65830282	A	G	0.0244544	x	Yes	-
57	rs7223813	rs56305452	17	65945840	A	G	0.029968	x	Yes	-
57	rs7223930	rs56305452	17	65842186	A	G	0.0290187	x	Yes	+
57	rs7224923	rs56305452	17	65842265	T	G	0.0391569	x	Yes	-
57	rs73338706	rs56305452	17	65926604	T	C	0.0320056	x	Yes	-
57	rs73352808	rs56305452	17	65875157	A	G	0.0446111	x	Yes	+
57	rs7405743	rs56305452	17	66043538	T	C	0.037792	x	Yes	-
57	rs7406031	rs56305452	17	66021753	T	C	0.0423772	x	Yes	-
57	rs7406141	rs56305452	17	66021986	T	C	0.0492747	x	Yes	+
57	rs74541577	rs56305452	17	65853651	T	C	0.0393306	x	Yes	+
57	rs74564337	rs56305452	17	65999567	T	C	0.042029	x	Yes	+
57	rs7503834	rs56305452	17	66033984	A	G	0.0380242	x	Yes	-
57	rs75231441	rs56305452	17	65885485	A	G	0.0424516	x	Yes	-
57	rs75236169	rs56305452	17	66031199	T	C	0.0437694	x	Yes	-
57	rs75772932	rs56305452	17	65984537	A	G	0.0176286	x	Yes	+
57	rs76542911	rs56305452	17	66055894	A	G	0.043094	Yes	Yes	+
57	rs77194282	rs56305452	17	66061626	T	C	0.0474756	Yes	Yes	+
57	rs78429175	rs56305452	17	66054771	A	G	0.0432366	Yes	Yes	+
57	rs78452260	rs56305452	17	65848522	T	G	0.0358929	x	Yes	+
57	rs79415988	rs56305452	17	66066969	T	C	0.0310522	Yes	Yes	+
57	rs80135947	rs56305452	17	65836001	A	C	0.0391896	x	Yes	-
57	rs8065906	rs56305452	17	65902645	A	G	0.037393	x	Yes	+
57	rs8067892	rs56305452	17	65837983	A	G	0.0308863	x	Yes	-
57	rs8071463	rs56305452	17	65938655	A	G	0.030348	x	Yes	-
57	rs8072225	rs56305452	17	65912960	A	G	0.0444704	x	Yes	-
57	rs8073510	rs56305452	17	65839210	A	G	0.0399584	x	Yes	-
57	rs8074078	rs56305452	17	65838743	T	G	0.0311654	x	Yes	-
57	rs8075604	rs56305452	17	66063101	T	C	0.0468192	Yes	Yes	+
57	rs8077872	rs56305452	17	65861059	T	G	0.038821	x	Yes	+
57	rs8078543	rs56305452	17	66037251	T	G	0.0438545	x	Yes	-
57	rs8079291	rs56305452	17	65887622	A	G	0.0420025	x	Yes	-
57	rs8079754	rs56305452	17	65887896	A	G	0.0421613	x	Yes	-
57	rs8081714	rs56305452	17	66001130	A	G	0.0285275	x	Yes	+
57	rs8081856	rs56305452	17	65845918	A	G	0.0319893	x	Yes	-
57	rs8082512	rs56305452	17	65837059	T	C	0.0394646	x	Yes	-
57	rs8182243	rs56305452	17	66018505	T	C	0.0406892	x	Yes	+
57	rs9330556	rs56305452	17	66069898	T	G	0.0396259	x	Yes	-
57	rs9890629	rs56305452	17	65871559	A	G	0.0364446	x	Yes	+
57	rs9892803	rs56305452	17	65879243	T	G	0.035082	x	Yes	-
57	rs9897982	rs56305452	17	65879592	T	G	0.0364058	x	Yes	+
57	rs9907491	rs56305452	17	65949993	A	G	0.0349051	x	Yes	-
57	rs9912084	rs56305452	17	65868035	A	C	0.0357652	x	Yes	-
57	rs9912770	rs56305452	17	65868233	T	C	0.0356979	x	Yes	+
57	rs9913471	rs56305452	17	65874495	T	C	0.0386888	x	Yes	+
57	rs9915108	rs56305452	17	65874463	T	C	0.0381888	x	Yes	-
58	rs10221326	rs8097125	18	13036034	T	G	0.0473484	Yes	Yes	-
58	rs11080620	rs8097125	18	13029068	T	G	0.0498543	Yes	Yes	-
58	rs1786263	rs8097125	18	13116432	T	G	0.049969	Yes	Yes	+
58	rs1787008	rs8097125	18	13058318	A	G	0.0493237	Yes	Yes	-
58	rs472992	rs8097125	18	13087789	A	G	0.0495206	Yes	Yes	-
58	rs478006	rs8097125	18	13054103	A	G	0.0488858	Yes	Yes	-
58	rs490853	rs8097125	18	13106337	T	C	0.0461181	Yes	Yes	-
58	rs556536	rs8097125	18	13065484	A	C	0.0466372	Yes	Yes	+
58	rs565832	rs8097125	18	13070930	T	C	0.049313	Yes	Yes	-
58	rs567031	rs8097125	18	13093774	A	G	0.0488687	Yes	Yes	+
58	rs6505777	rs8097125	18	13008369	A	G	0.0416469	Yes	Yes	-
58	rs692964	rs8097125	18	13094132	A	G	0.0486202	Yes	Yes	+
58	rs7226616	rs8097125	18	13009905	T	C	0.0413234	Yes	Yes	-
58	rs7234094	rs8097125	18	13007480	T	G	0.0417346	Yes	Yes	-
58	rs7234960	rs8097125	18	13018071	A	G	0.0465073	Yes	Yes	-
58	rs7237236	rs8097125	18	13011431	T	C	0.041516	Yes	Yes	-
58	rs7241536	rs8097125	18	13033974	A	G	0.0430589	Yes	Yes	+
58	rs7243000	rs8097125	18	13097788	A	C	0.0328693	Yes	Yes	-
58	rs7243660	rs8097125	18	13002196	T	C	0.0412824	Yes	Yes	+
58	rs8086346	rs8097125	18	13098597	T	C	0.0247009	Yes	Yes	-
58	rs8097038	rs8097125	18	13037018	A	C	0.0444467	Yes	Yes	+
58	rs8097125	rs8097125	18	13005473	T	C	0.0221918	Yes	Yes	-
58	rs9748518	rs8097125	18	12979220	T	C	0.0322869	Yes	Yes	-
58	rs9748528	rs8097125	18	12979434	T	C	0.031897	Yes	Yes	-
58	rs9748873	rs8097125	18	12979435	A	G	0.0319029	Yes	Yes	-
58	rs9964466	rs8097125	18	13030383	A	G	0.0430627	Yes	Yes	+
59	rs10164055	rs7231178	18	50919600	T	C	0.0223367	x	Yes	-
59	rs10221371	rs7231178	18	50726294	A	C	0.0349389	x	Yes	+
59	rs10221412	rs7231178	18	50724472	T	C	0.0223645	x	Yes	-
59	rs10502966	rs7231178	18	50748499	A	G	0.0484186	x	Yes	-
59	rs10502971	rs7231178	18	50887961	A	G	0.0169589	x	Yes	+
59	rs11082972	rs7231178	18	50733150	T	C	0.0174968	x	Yes	+
59	rs11659803	rs7231178	18	50635119	A	G	0.0493338	x	Yes	+
59	rs11660187	rs7231178	18	50801646	A	C	0.0309086	x	Yes	+
59	rs11660938	rs7231178	18	50812736	T	G	0.0322356	x	Yes	+
59	rs11661483	rs7231178	18	50571954	A	G	0.0337098	x	Yes	-
59	rs11662416	rs7231178	18	50847784	T	G	0.0258154	x	Yes	-
59	rs11663393	rs7231178	18	50614732	A	G	0.0316308	x	Yes	+
59	rs11663694	rs7231178	18	50559986	T	C	0.0382369	x	Yes	-
59	rs11664320	rs7231178	18	50872623	T	C	0.0224865	x	Yes	-
59	rs11665242	rs7231178	18	50907127	A	G	0.0240604	x	Yes	-
59	rs11873021	rs7231178	18	50836414	A	G	0.0264599	x	Yes	-
59	rs11877496	rs7231178	18	50828902	T	C	0.0268192	x	Yes	+
59	rs11877505	rs7231178	18	50829023	A	G	0.0273802	x	Yes	-
59	rs12953529	rs7231178	18	50968973	A	G	0.0199564	x	Yes	-
59	rs12969597	rs7231178	18	50782037	A	G	0.027654	x	Yes	+
59	rs13381096	rs7231178	18	50949402	A	C	0.0210299	x	Yes	+
59	rs1346914	rs7231178	18	50845830	T	G	0.0265754	x	Yes	+
59	rs1367633	rs7231178	18	50747956	A	G	0.036096	x	Yes	+
59	rs1367635	rs7231178	18	50861409	T	C	0.0218516	x	Yes	-
59	rs1431181	rs7231178	18	50779412	A	G	0.032224	x	Yes	+
59	rs1431187	rs72925321	18	50803976	T	C	0.0464766	Yes	Yes	-
59	rs1431188	rs7231178	18	50796817	A	G	0.0299615	x	Yes	-
59	rs1431196	rs7231178	18	50832102	A	G	0.0254857	x	Yes	-
59	rs1431197	rs7231178	18	50791960	A	G	0.0232351	x	Yes	+
59	rs1504744	rs7231178	18	50889558	A	G	0.0251916	x	Yes	+
59	rs1504746	rs7231178	18	50858019	T	C	0.0222202	x	Yes	-
59	rs17408393	rs7231178	18	50709981	A	G	0.0388162	x	Yes	-
59	rs17410557	rs7231178	18	50776391	T	C	0.0389634	x	Yes	-
59	rs17411061	rs7231178	18	50795113	T	C	0.0270722	x	Yes	+
59	rs17411339	rs7231178	18	50807359	A	G	0.02986	x	Yes	-
59	rs17411548	rs7231178	18	50822943	T	G	0.0298302	x	Yes	+
59	rs17412636	rs7231178	18	50886142	A	C	0.0241653	x	Yes	-
59	rs17412782	rs7231178	18	50888351	T	C	0.0249076	x	Yes	-
59	rs17417046	rs7231178	18	50984997	T	C	0.0219182	x	Yes	+
59	rs17486305	rs7231178	18	50697120	T	C	0.0477933	x	Yes	+
59	rs17487256	rs7231178	18	50718314	T	C	0.0445208	x	Yes	+
59	rs17487484	rs7231178	18	50723283	T	G	0.00622697	x	Yes	-
59	rs17488531	rs7231178	18	50754996	A	G	0.0338782	x	Yes	+
59	rs17488580	rs7231178	18	50757261	T	G	0.047922	x	Yes	+
59	rs17488727	rs7231178	18	50760933	A	C	0.048575	x	Yes	-
59	rs17501820	rs7231178	18	50778737	T	C	0.0298312	x	Yes	+
59	rs17503448	rs7231178	18	50857663	T	C	0.024057	x	Yes	-
59	rs17504372	rs7231178	18	50903050	T	C	0.0227992	x	Yes	+
59	rs17515923	rs7231178	18	51053176	T	G	0.0186298	x	Yes	-
59	rs1972044	rs7231178	18	50931080	A	G	0.0273757	x	Yes	+
59	rs1979914	rs7231178	18	50854411	A	G	0.0239071	x	Yes	+
59	rs2043145	rs7231178	18	50851107	A	G	0.0279618	x	Yes	-
59	rs2047914	rs7231178	18	50850307	T	C	0.025966	x	Yes	+
59	rs2069191	rs7231178	18	50723460	T	C	0.0062137	x	Yes	-
59	rs2292042	rs7231178	18	51031932	T	C	0.0140423	x	Yes	+
59	rs2298606	rs7231178	18	50731823	T	C	0.0204699	x	Yes	-
59	rs28628885	rs7231178	18	50753726	A	G	0.0329174	x	Yes	-
59	rs2879567	rs7231178	18	51021360	A	C	0.032207	x	Yes	-
59	rs28873404	rs7231178	18	51039438	T	C	0.0191435	x	Yes	+
59	rs34569535	rs62097903	18	50552965	A	C	0.0496056	x	Yes	-
59	rs35195355	rs7231178	18	51000945	A	C	0.0323808	x	Yes	+
59	rs4129439	rs7231178	18	50589083	T	C	0.0387336	x	Yes	-
59	rs4291980	rs7231178	18	50617175	T	G	0.0345334	x	Yes	-
59	rs4321259	rs7231178	18	50623640	A	G	0.0336625	x	Yes	+
59	rs4343352	rs7231178	18	50645664	T	C	0.0474672	x	Yes	-
59	rs4405620	rs7231178	18	50884529	A	C	0.0236629	x	Yes	+
59	rs4414555	rs7231178	18	50643812	T	C	0.0358018	x	Yes	-
59	rs4459619	rs7231178	18	50620708	T	C	0.0262196	x	Yes	-
59	rs4468701	rs7231178	18	50611280	T	C	0.0264057	x	Yes	-
59	rs4494619	rs7231178	18	50633449	T	G	0.0237495	x	Yes	-
59	rs4506980	rs7231178	18	50597654	A	G	0.0341196	x	Yes	+
59	rs4510098	rs7231178	18	50597737	T	G	0.0307573	x	Yes	+
59	rs4632195	rs7231178	18	50746748	T	C	0.00551451	x	Yes	+
59	rs4643406	rs7231178	18	50818891	T	C	0.0238676	x	Yes	+
59	rs4939722	rs7231178	18	50672763	T	C	0.0401664	x	Yes	+
59	rs4940252	rs7231178	18	50833083	A	G	0.023572	x	Yes	-
59	rs5020052	rs7231178	18	50641696	T	G	0.0220562	x	Yes	-
59	rs55906054	rs7231178	18	50740163	A	G	0.0422615	x	Yes	-
59	rs56796226	rs62097903	18	50543302	A	G	0.0466401	x	Yes	-
59	rs57841322	rs7231178	18	50753609	T	C	0.0344344	x	Yes	-
59	rs60939828	rs7231178	18	50729267	T	C	0.038913	x	Yes	-
59	rs62097899	rs62097903	18	50517509	T	C	0.0479512	x	Yes	+
59	rs62097903	rs62097903	18	50531232	A	G	0.0447071	x	Yes	-
59	rs62097950	rs7231178	18	50573936	T	C	0.0333273	x	Yes	+
59	rs62097980	rs7231178	18	50796002	A	G	0.0292676	x	Yes	+
59	rs62097985	rs7231178	18	50810675	T	C	0.0316293	x	Yes	+
59	rs62097986	rs7231178	18	50818827	A	C	0.029033	x	Yes	+
59	rs62097987	rs7231178	18	50819236	T	G	0.0280248	x	Yes	-
59	rs62097989	rs7231178	18	50826478	A	G	0.0290294	x	Yes	-
59	rs62097992	rs7231178	18	50835863	T	C	0.0263424	x	Yes	-
59	rs62097996	rs7231178	18	50843269	A	C	0.0285248	x	Yes	+
59	rs62098012	rs7231178	18	50862311	T	C	0.0217587	x	Yes	+
59	rs62098013	rs7231178	18	50863861	A	G	0.0484438	x	Yes	+
59	rs62098014	rs7231178	18	50869085	T	C	0.0234709	x	Yes	-
59	rs62098017	rs7231178	18	50875225	A	C	0.0237151	x	Yes	-
59	rs62098020	rs7231178	18	50882781	T	C	0.0209002	x	Yes	+
59	rs62098022	rs7231178	18	50888891	T	C	0.0243043	x	Yes	-
59	rs62098023	rs7231178	18	50894002	A	C	0.0243334	x	Yes	-
59	rs62098042	rs7231178	18	50902560	A	G	0.0232136	x	Yes	+
59	rs62098043	rs7231178	18	50902578	A	G	0.0231664	x	Yes	-
59	rs62098046	rs7231178	18	50902773	T	C	0.0233459	x	Yes	-
59	rs62098047	rs7231178	18	50904361	A	G	0.022892	x	Yes	+
59	rs62098049	rs7231178	18	50904666	A	G	0.0231101	x	Yes	+
59	rs62098329	rs7231178	18	51050914	A	C	0.0201236	x	Yes	+
59	rs62098330	rs7231178	18	51055069	T	C	0.0371333	x	Yes	-
59	rs62099173	rs7231178	18	50595936	T	G	0.0335343	x	Yes	-
59	rs62099183	rs7231178	18	50622992	T	C	0.0247316	x	Yes	-
59	rs62099230	rs7231178	18	50721712	A	G	0.041261	x	Yes	+
59	rs62099231	rs7231178	18	50724899	A	G	0.00642839	x	Yes	+
59	rs62099234	rs7231178	18	50730524	T	C	0.0393147	x	Yes	+
59	rs62099235	rs7231178	18	50730603	A	G	0.0389774	x	Yes	+
59	rs62099236	rs7231178	18	50731055	T	G	0.0386721	x	Yes	+
59	rs62100767	rs7231178	18	50738039	A	G	0.0468679	x	Yes	-
59	rs62100769	rs7231178	18	50739860	A	G	0.0396061	x	Yes	+
59	rs62100772	rs7231178	18	50741297	A	G	0.0425783	x	Yes	+
59	rs62100775	rs7231178	18	50754093	A	G	0.0425187	x	Yes	-
59	rs62100777	rs7231178	18	50755757	A	G	0.0331858	x	Yes	+
59	rs62100778	rs7231178	18	50758040	A	G	0.0388433	x	Yes	-
59	rs6508207	rs7231178	18	50737950	T	C	0.016146	x	Yes	-
59	rs6508209	rs7231178	18	50743533	A	G	0.0193195	x	Yes	+
59	rs6508210	rs7231178	18	50747191	A	C	0.0046221	x	Yes	-
59	rs7227069	rs7231178	18	50731802	A	G	0.0393703	x	Yes	+
59	rs7227402	rs7231178	18	50895766	T	G	0.0228108	x	Yes	+
59	rs7230285	rs7231178	18	50723080	A	G	0.00606322	x	Yes	+
59	rs7230446	rs7231178	18	50723179	A	G	0.00607455	x	Yes	+
59	rs7231178	rs7231178	18	50753741	A	G	0.00436452	x	Yes	+
59	rs7232543	rs7231178	18	50718757	A	G	0.0307818	x	Yes	-
59	rs7233123	rs7231178	18	50718880	A	G	0.0312478	x	Yes	+
59	rs7243019	rs7231178	18	50713243	T	C	0.0160294	x	Yes	+
59	rs7245004	rs7231178	18	50716945	A	C	0.0260263	x	Yes	+
59	rs72925321	rs72925321	18	50807202	A	G	0.00977672	Yes	Yes	-
59	rs72925341	rs7231178	18	50827476	T	C	0.0297564	x	Yes	+
59	rs7505145	rs7231178	18	50711776	A	C	0.013397	x	Yes	-
59	rs7506245	rs7231178	18	50570403	A	G	0.0373003	x	Yes	-
59	rs8084239	rs7231178	18	50725943	T	C	0.00553795	x	Yes	-
59	rs8084351	rs7231178	18	50726559	A	G	0.00509268	x	Yes	+
59	rs8089828	rs7231178	18	50669725	T	C	0.035404	x	Yes	+
59	rs8098405	rs7231178	18	50752373	A	G	0.0333252	x	Yes	-
59	rs8099160	rs7231178	18	50752610	A	G	0.0333018	x	Yes	+
59	rs9807529	rs7231178	18	50944901	A	G	0.0258545	x	Yes	-
60	rs596668	rs613872	18	53264343	A	G	0.0364921	x	Yes	-
60	rs611775	rs613872	18	53337939	T	C	0.0298056	x	Yes	-
60	rs613872	rs613872	18	53210302	T	G	0.0250758	x	Yes	+
60	rs618869	rs613872	18	53248151	T	C	0.0299804	x	Yes	-
60	rs629376	rs613872	18	53331267	A	G	0.0294258	x	Yes	-
60	rs651350	rs613872	18	53320738	A	G	0.0286449	x	Yes	+
60	rs652714	rs613872	18	53321026	A	G	0.0281257	x	Yes	-
60	rs784218	rs613872	18	53352082	T	G	0.0351253	Yes	Yes	-
60	rs784257	rs613872	18	53397199	T	C	0.0498794	Yes	Yes	-
60	rs784258	rs613872	18	53393895	T	C	0.0375387	x	Yes	-
61	rs17069902	rs34950264	18	60031599	T	C	0.0458618	Yes	Yes	+
61	rs34950264	rs34950264	18	60029122	A	G	0.0366978	Yes	Yes	-
62	rs1038084	rs12971925	19	38030682	A	C	0.0290604	Yes	Yes	-
62	rs10407657	rs12971925	19	38070091	A	G	0.0251324	Yes	Yes	-
62	rs1116234	rs12971925	19	38116265	A	C	0.0202004	Yes	Yes	+
62	rs1226598	rs12971925	19	37747799	A	G	0.0370088	Yes	Yes	-
62	rs12462716	rs12971925	19	37693764	T	C	0.0261671	x	Yes	-
62	rs12463321	rs12971925	19	37651855	A	G	0.0136584	x	Yes	-
62	rs12971925	rs12971925	19	37747224	A	G	0.00757951	x	Yes	+
62	rs17242235	rs12971925	19	37440363	A	G	0.0306515	x	Yes	-
62	rs1824796	rs12971925	19	38096288	T	C	0.0337	Yes	Yes	-
62	rs2385119	rs2385119	19	38115841	A	C	0.0440728	Yes	Yes	-
62	rs2891683	rs12971925	19	38115785	T	C	0.0197254	Yes	Yes	+
62	rs2927744	rs12971925	19	38129535	A	G	0.0207067	Yes	Yes	-
62	rs4586564	rs12971925	19	37746380	T	G	0.010182	x	Yes	-
62	rs4803216	rs12971925	19	38033674	T	G	0.0261115	Yes	Yes	-
62	rs7255283	rs12971925	19	38073407	A	G	0.0246713	Yes	Yes	+
62	rs7256747	rs12971925	19	38067999	T	C	0.0400106	Yes	Yes	-
62	rs7259566	rs12971925	19	38095503	T	C	0.0247074	Yes	Yes	-
62	rs8102916	rs12971925	19	38163533	T	C	0.0248294	Yes	Yes	-
62	rs8107507	rs12971925	19	37805601	T	C	0.0475243	Yes	Yes	-
62	rs8113076	rs12971925	19	38068832	A	G	0.0249257	Yes	Yes	-
63	rs6058534	rs6058534	20	30736695	A	G	0.0330914	x	Yes	+
63	rs6121365	rs6058534	20	30739825	T	C	0.0480558	x	Yes	-
63	rs62204984	rs6058534	20	30709069	A	G	0.0473663	Yes	Yes	+
64	rs4812695	rs6030790	20	41967118	T	C	0.0488661	Yes	Yes	+
64	rs6030790	rs6030790	20	41956451	A	C	0.0279954	Yes	Yes	+
a. Independent genomic risk loci as defined by FUMA b. Index lead SNP c. Genomic position of SNPs based on hg19 d. Original GWAS significance (5e-8) or not in multidimensional pain e. Original GWAS significance (5e-8) or not in suicide attempt f. Concodance of effect between multidimensional pain and suicide attempt; when different directions, first and second directions indicate for multidimensi…

## Sheet: Table S6
Supplementary Table 6. Full results from conjFDR analysis for shared loci between multidimensional pain and suicide death
Genomic locia	SNP	Indexb	CHR	BPc	A1	A2	conjFDR	Novel in MPd	Novel in SDe	Concodant effectf
1	rs1074404	rs12135577	1	208436320	T	G	0.0469156	Yes	Yes	+
1	rs11119024	rs12135577	1	208433634	A	G	0.0477321	Yes	Yes	+
1	rs11119025	rs12135577	1	208433789	T	C	0.0491739	Yes	Yes	+
1	rs11119026	rs12135577	1	208433790	A	G	0.0477321	Yes	Yes	-
1	rs11119027	rs12135577	1	208433883	A	G	0.0477321	Yes	Yes	+
1	rs11119028	rs12135577	1	208435592	T	C	0.0477321	Yes	Yes	-
1	rs12135577	rs12135577	1	208424858	A	G	0.0272664	Yes	Yes	+
1	rs12140101	rs12135577	1	208433473	T	C	0.0477321	Yes	Yes	+
1	rs12730749	rs12135577	1	208434208	A	C	0.0477321	Yes	Yes	+
1	rs12731099	rs12135577	1	208434454	A	G	0.0477321	Yes	Yes	+
1	rs12760062	rs12135577	1	208436730	A	G	0.0469156	Yes	Yes	-
1	rs6540460	rs12135577	1	208434607	A	G	0.0477321	Yes	Yes	+
1	rs6540461	rs12135577	1	208434877	A	G	0.0477321	Yes	Yes	+
1	rs6540462	rs12135577	1	208434896	A	G	0.0477321	Yes	Yes	-
1	rs6540463	rs12135577	1	208434934	A	G	0.0477321	Yes	Yes	+
2	rs17043868	rs17043868	2	53180166	T	G	0.0387765	Yes	Yes	+
2	rs62140322	rs17043868	2	53174349	A	G	0.0393347	Yes	Yes	+
3	rs10226011	rs11505922	7	114003712	T	C	0.0202627	Yes	Yes	-/+
3	rs11505922	rs11505922	7	114010651	T	C	0.0195732	Yes	Yes	-/+
3	rs7783870	rs7783870	7	114199599	A	G	0.0427299	Yes	Yes	-
3	rs7785799	rs11505922	7	114004477	A	G	0.019979	Yes	Yes	+/-
4	rs4582625	rs4582625	9	80520544	T	C	0.0412834	Yes	Yes	+
5	rs67204507	rs67204507	10	9681387	T	C	0.0442058	Yes	Yes	-
6	rs10459533	rs12433032	14	69778370	T	C	0.0335795	x	Yes	+
6	rs10459534	rs12433032	14	69778449	T	C	0.0347197	x	Yes	-
6	rs10498529	rs12433032	14	69770690	T	C	0.0212544	x	Yes	-
6	rs11158798	rs12433032	14	69692299	A	G	0.0493508	x	Yes	-
6	rs112178501	rs12433032	14	69771826	T	G	0.026756	x	Yes	-
6	rs11625374	rs12433032	14	69679627	A	G	0.0485393	x	Yes	+
6	rs12431706	rs12433032	14	69716438	T	C	0.0361979	x	Yes	+
6	rs12432470	rs12433032	14	69780678	T	C	0.0421674	Yes	Yes	+
6	rs12433032	rs12433032	14	69752984	A	C	0.0168515	x	Yes	-
6	rs12433349	rs12433032	14	69744942	T	G	0.0271451	Yes	Yes	-
6	rs12434764	rs12433032	14	69700574	T	C	0.0393035	Yes	Yes	+
6	rs12435957	rs12433032	14	69773986	A	G	0.03343	x	Yes	+
6	rs12436823	rs12433032	14	69745303	A	G	0.0274541	Yes	Yes	-
6	rs12437400	rs12433032	14	69782808	T	C	0.0330441	Yes	Yes	-
6	rs12881742	rs12433032	14	69746724	T	C	0.0371773	Yes	Yes	-
6	rs12889849	rs12433032	14	69693119	A	G	0.0412856	x	Yes	+
6	rs12890560	rs12433032	14	69674352	A	G	0.0382175	x	Yes	+
6	rs1563295	rs12433032	14	69785699	T	C	0.0327031	Yes	Yes	+
6	rs17106899	rs12433032	14	69782011	A	G	0.0399733	Yes	Yes	-
6	rs199652245	rs12433032	14	69778793	T	C	0.0347197	x	Yes	-
6	rs2139541	rs12433032	14	69719700	A	G	0.0327971	Yes	Yes	+
6	rs2185494	rs12433032	14	69773222	A	G	0.0331389	x	Yes	+
6	rs3211166	rs12433032	14	69703158	A	G	0.0405625	Yes	Yes	-
6	rs7148045	rs12433032	14	69699559	T	C	0.0395499	Yes	Yes	-
6	rs8008082	rs12433032	14	69743175	A	G	0.0235795	Yes	Yes	+
6	rs8011772	rs12433032	14	69770569	A	G	0.0303837	x	Yes	+
7	rs1026257	rs8090097	18	31418131	T	C	0.034548	Yes	Yes	-
7	rs1027332	rs8090097	18	31410097	A	C	0.0367808	Yes	Yes	-
7	rs10460050	rs8090097	18	31413671	T	G	0.00836652	Yes	Yes	+
7	rs10460051	rs8090097	18	31413679	T	C	0.0162133	Yes	Yes	+
7	rs11873871	rs8090097	18	31391601	A	G	0.0292617	Yes	Yes	+
7	rs11874521	rs8090097	18	31391966	A	G	0.0302995	Yes	Yes	+
7	rs11876492	rs8090097	18	31413804	T	C	0.0262031	Yes	Yes	-
7	rs11877423	rs8090097	18	31390368	A	G	0.0292617	Yes	Yes	+
7	rs12455290	rs8090097	18	31398778	A	G	0.0353991	Yes	Yes	-
7	rs12607190	rs8090097	18	31394699	A	G	0.0292617	Yes	Yes	+
7	rs12963024	rs8090097	18	31389547	T	C	0.0461738	Yes	Yes	-
7	rs12963804	rs8090097	18	31391208	T	C	0.0292617	Yes	Yes	-
7	rs12967889	rs8090097	18	31399371	A	G	0.0397966	Yes	Yes	+
7	rs1452648	rs8090097	18	31411003	T	G	0.037909	Yes	Yes	+
7	rs1452649	rs8090097	18	31410858	A	G	0.0380221	Yes	Yes	-
7	rs1493908	rs8090097	18	31411700	A	G	0.0356393	Yes	Yes	+
7	rs1493912	rs8090097	18	31361213	T	G	0.0299966	Yes	Yes	-
7	rs1493917	rs8090097	18	31392833	A	G	0.0292617	Yes	Yes	+
7	rs1493924	rs8090097	18	31314721	T	C	0.0314624	Yes	Yes	-
7	rs17747003	rs8090097	18	31332460	T	G	0.00978786	x	Yes	+
7	rs2123333	rs8090097	18	31410730	A	G	0.0380971	Yes	Yes	+
7	rs2172626	rs8090097	18	31410478	T	C	0.0380095	Yes	Yes	+
7	rs2220810	rs8090097	18	31422612	A	G	0.0314038	Yes	Yes	-
7	rs2976	rs8090097	18	31403254	T	C	0.0431458	Yes	Yes	-
7	rs34146745	rs8090097	18	31399844	T	C	0.0442323	Yes	Yes	+
7	rs34724817	rs8090097	18	31385584	A	G	0.0134208	Yes	Yes	-
7	rs34888443	rs8090097	18	31399992	T	C	0.0244199	Yes	Yes	-
7	rs34910379	rs8090097	18	31400047	A	G	0.0173106	Yes	Yes	-
7	rs3744888	rs8090097	18	31402594	A	G	0.0232803	Yes	Yes	-
7	rs4239383	rs8090097	18	31401066	T	C	0.0173527	Yes	Yes	-
7	rs4392137	rs8090097	18	31316708	T	C	0.020488	Yes	Yes	-
7	rs4427879	rs8090097	18	31404751	A	G	0.0127419	Yes	Yes	-
7	rs4638656	rs8090097	18	31396982	A	G	0.0207424	Yes	Yes	-
7	rs4997493	rs8090097	18	31407302	T	C	0.0331981	Yes	Yes	+
7	rs6507070	rs8090097	18	31393244	A	C	0.0292617	Yes	Yes	+
7	rs6507071	rs8090097	18	31393333	T	C	0.0292617	Yes	Yes	+
7	rs7227708	rs8090097	18	31393091	A	G	0.0292617	Yes	Yes	-
7	rs7228309	rs8090097	18	31412519	T	C	0.0143655	Yes	Yes	+
7	rs7239283	rs8090097	18	31395397	A	G	0.0412687	Yes	Yes	+
7	rs7243220	rs8090097	18	31408110	T	G	0.014563	Yes	Yes	-
7	rs8085761	rs8090097	18	31415928	T	C	0.0115766	Yes	Yes	+
7	rs8085989	rs8090097	18	31415929	A	G	0.0131247	Yes	Yes	+
7	rs8086041	rs8090097	18	31402756	A	G	0.0247549	Yes	Yes	+
7	rs8088362	rs8090097	18	31413016	A	G	0.00972727	Yes	Yes	-
7	rs8090097	rs8090097	18	31413448	T	G	0.00813241	Yes	Yes	-
7	rs8091918	rs8090097	18	31407160	A	G	0.0364847	Yes	Yes	-
7	rs8098255	rs8090097	18	31401850	T	C	0.0270126	Yes	Yes	+
7	rs8098328	rs8090097	18	31401732	A	G	0.0270126	Yes	Yes	+
7	rs9945976	rs8090097	18	31409314	T	C	0.0378712	Yes	Yes	+
7	rs9949631	rs8090097	18	31410567	A	G	0.0381344	Yes	Yes	+
7	rs9953948	rs8090097	18	31399399	A	G	0.0226871	Yes	Yes	+
7	rs9954214	rs8090097	18	31390754	T	C	0.0292617	Yes	Yes	-
7	rs9965563	rs8090097	18	31398985	T	G	0.0213931	Yes	Yes	-
8	rs10402661	rs10421505	19	19432959	A	G	0.005986	Yes	Yes	-
8	rs10403731	rs10421505	19	19469296	A	G	0.0460139	Yes	Yes	+
8	rs10421505	rs10421505	19	19459554	T	C	0.00447906	Yes	Yes	+
8	rs11085259	rs10421505	19	19445856	T	C	0.00787525	Yes	Yes	+
8	rs11085261	rs10421505	19	19462606	A	G	0.00806499	Yes	Yes	+
8	rs12976025	rs10421505	19	19429220	T	C	0.00718047	Yes	Yes	+
8	rs12982276	rs10421505	19	19459800	T	C	0.00464856	Yes	Yes	-
8	rs2301668	rs10421505	19	19452249	A	G	0.0067073	Yes	Yes	+
8	rs2301671	rs10421505	19	19466269	T	C	0.020212	Yes	Yes	+
8	rs35824797	rs10421505	19	19456264	T	C	0.0101923	Yes	Yes	+
8	rs4808194	rs10421505	19	19435680	T	G	0.00697199	Yes	Yes	-
8	rs4808948	rs4808948	19	19480573	A	G	0.049416	Yes	Yes	+
8	rs74182638	rs10421505	19	19443101	T	C	0.036874	Yes	Yes	+
8	rs757000	rs10421505	19	19448301	A	G	0.006955	Yes	Yes	-
8	rs757001	rs10421505	19	19448808	A	G	0.00694954	Yes	Yes	+
8	rs9304960	rs10421505	19	19465529	A	G	0.0132517	Yes	Yes	+
8	rs968525	rs10421505	19	19459215	T	C	0.00572568	Yes	Yes	+
a. Independent genomic risk loci as defined by FUMA b. Index lead SNP c. Genomic position of SNPs based on hg19 d. Original GWAS significance (5e-8) or not in multidimensional pain e. Original GWAS significance (5e-8) or not in suicide death f. Concodance of effect between multidimensional pain and suicide death; when different directions, first and second directions indicate for multidimensional…

## Sheet: Table S7
Supplementary Table 7. Genes mapped by candidate SNPs shared between multidimensional pain and suicide attempt (conjFDR < 0.05)
Genes	pLIa	ncRVISb	posMapSNPsc	eqtlMapSNPsd	eqtlMaptse	sqtlMapSNPsf	sqtlMaptsg	IndSigSNPsh
ABCB6	2.11132e-17	-0.336963	0	3	Brain_Cerebellar_Hemisphere:Brain_Cerebellum	NA	NA	rs13029742;rs6715064;rs7577690
ABHD1	1.06027e-21	-0.251069	2	38	Colon_Sigmoid:Muscle_Skeletal:Nerve_Tibial	43	Testis	rs7579579;rs6547317;rs7599286;rs2384511;rs6547318;rs3820821;rs4665929;rs3820822;rs4665363;rs920437;rs920435;rs12615423;rs1992311;rs7589627;rs6759548;rs6718978;rs3739085;rs3820823;rs3739086;rs6707735;rs3739088;rs3769135;rs3769136;rs3769137;rs11126784;rs7355650;rs11126857;rs2289360;rs6547413;rs6754371;rs2304681;rs3769139;rs10185736;rs1131375;rs1057394;rs2384572;rs11691465;rs13423359;rs1866559;rs758…
AC016559.1	NA	NA	1	0	NA	NA	NA	rs3733893;rs12189006;rs2607144;rs2591388;rs6453434
ACP6	3.1441e-05	-0.0197645	0	2	Artery_Tibial:Brain_Anterior_cingulate_cortex_BA24	2	Artery_Tibial	rs12126629;rs10399871
ACSF3	1.37226e-15	0.534683	1	0	NA	NA	NA	rs12934766
ADAM23	0.995404	-0.6067	0	6	Whole_Blood	NA	NA	rs880173;rs17536656;rs17458580;rs17536670;rs10497885;rs10497886;rs72961159;rs77341951;rs530216089;rs200920710;rs181869831;rs55793928;rs72961179;rs72961182;rs2444300;rs72961183;rs1453174;rs2219006;rs72961186;rs35996820;rs1986850;rs72954216;rs55768806;rs6741227;rs111648447;rs149980972;rs113704739;rs150082185;rs76237953;rs72954225;rs76371363;rs72954237;rs72954244
AFF3	0.998913	-2.07875	1	1	Esophagus_Mucosa	NA	NA	rs17782474
AGBL5	0.0206949	-0.378651	2	27	Cells_Cultured_fibroblasts	NA	NA	rs7579579;rs6547317;rs7599286;rs2384511;rs6547318;rs3820821;rs4665929;rs3820822;rs4665363;rs920437;rs920435;rs12615423;rs1992311;rs7589627;rs6759548;rs6718978;rs3739085;rs3820823;rs3739086;rs6707735;rs3739088;rs3769135;rs3769136;rs3769137;rs11126784;rs7355650;rs11126857;rs2289360;rs6547413;rs6754371;rs2304681;rs3769139;rs10185736;rs1131375;rs1057394;rs2384572;rs11691465;rs13423359;rs1866559;rs758…
AGPAT4	0.6745	0.748253	1	1	Brain_Cerebellar_Hemisphere:Esophagus_Mucosa	NA	NA	rs34799296
AGXT	0.00359437	0.603586	0	1	Adrenal_Gland:Colon_Transverse	NA	NA	rs3755539
ALDOA	0.0248344	-1.30116	2	0	NA	2	Testis	rs35105141;rs9939774
AMIGO3	7.50516e-06	NA	5	0	NA	NA	NA	rs7617480;rs13091206;rs9811047;rs11720542;rs4955430;rs6774724;rs6790105;rs11130190;rs9842132;rs10155014;rs9861027;rs7648995;rs2140270;rs9757181;rs11715060;rs9817807;rs13096474;rs13061396;rs940045;rs7620024;rs8897;rs6446275;rs62259933;rs7619789;rs9654010;rs57273516;rs138084484;rs4855869;rs73073004;rs113741748;rs2329025;rs1106620;rs9860055;rs72934271;rs4855853;rs4855838;rs10865956;rs11130204;rs6797…
AMT	0.000569475	-0.0226371	7	106	Adipose_Subcutaneous:Adipose_Visceral_Omentum:Cells_EBV-transformed_lymphocytes:Whole_Blood:Artery_Aorta:Artery_Coronary:Artery_Tibial:Brain_Anterior_cingulate_cortex_BA24:Brain_Caudate_basal_ganglia:Brain_Cerebellar_Hemisphere:Brain_Cerebellum:Brain_Cortex:Brain_Frontal_Cortex_BA9:Brain_Hippocampus:Brain_Hypothalamus:Brain_Nucleus_accumbens_basal_ganglia:Brain_Putamen_basal_ganglia:Brain_Spinal_…	3	Skin_Not_Sun_Exposed_Suprapubic	rs7617480;rs13091206;rs9811047;rs11720542;rs4955430;rs6774724;rs6790105;rs11130190;rs9842132;rs10155014;rs9861027;rs7648995;rs2140270;rs9757181;rs11715060;rs9817807;rs13096474;rs13061396;rs940045;rs7620024;rs8897;rs6446275;rs62259933;rs7619789;rs9654010;rs57273516;rs138084484;rs4855869;rs73073004;rs113741748;rs2329025;rs1106620;rs9860055;rs72934271;rs4855853;rs4855838;rs10865956;rs11130204;rs6797…
ANKK1	2.51117e-08	-0.0175482	36	96	Adipose_Subcutaneous:Adipose_Visceral_Omentum:Whole_Blood:Artery_Aorta:Artery_Coronary:Artery_Tibial:Breast_Mammary_Tissue:Colon_Sigmoid:Colon_Transverse:Esophagus_Gastroesophageal_Junction:Esophagus_Mucosa:Esophagus_Muscularis:Heart_Atrial_Appendage:Heart_Left_Ventricle:Liver:Lung:Muscle_Skeletal:Nerve_Tibial:Pancreas:Small_Intestine_Terminal_Ileum:Spleen:Stomach:Testis:Thyroid	59	Brain_Nucleus_accumbens_basal_ganglia:Pituitary:Skin_Not_Sun_Exposed_Suprapubic:Skin_Sun_Exposed_Lower_leg	rs11214582;rs10891538;rs11214583;rs11493880;rs7939992;rs4438071;rs4370966;rs11214587;rs10789942;rs10891540;rs12804573;rs1078;rs2155463;rs2186799;rs2186800;rs11214589;rs754672;rs7116782;rs10891544;rs877137;rs11214594;rs11214595;rs17600713;rs34601878;rs12360992;rs35023999;rs10891547;rs10891548;rs11604671;rs2734849;rs10891549;rs1554929;rs11214603;rs6277;rs12363125;rs2734839;rs2734838;rs2734837;rs110…
APEH	0.0132157	-0.271805	2	85	Adipose_Subcutaneous:Esophagus_Mucosa:Nerve_Tibial:Cells_Cultured_fibroblasts:Skin_Not_Sun_Exposed_Suprapubic:Skin_Sun_Exposed_Lower_leg	NA	NA	rs7617480;rs13091206;rs9811047;rs11720542;rs4955430;rs6774724;rs6790105;rs11130190;rs9842132;rs10155014;rs9861027;rs7648995;rs2140270;rs9757181;rs11715060;rs9817807;rs13096474;rs13061396;rs940045;rs7620024;rs8897;rs6446275;rs62259933;rs7619789;rs9654010;rs57273516;rs138084484;rs4855869;rs73073004;rs113741748;rs2329025;rs1106620;rs9860055;rs72934271;rs4855853;rs4855838;rs10865956;rs11130204;rs6797…
ARHGAP15	5.25406e-06	0.0915151	19	0	NA	NA	NA	rs4662327;rs10189912;rs12691680;rs35942385;rs13411140;rs13024996;rs4273169;rs28684621;rs13413953;rs10048736;rs4662334;rs62172156;rs35789697;rs13428598;rs13409451;rs10166361;rs35125029;rs10180461;rs10191758
ARIH2	0.987412	-1.69992	0	106	Adipose_Subcutaneous:Breast_Mammary_Tissue:Esophagus_Mucosa:Heart_Atrial_Appendage:Heart_Left_Ventricle:Lung:Nerve_Tibial:Pancreas:Pituitary:Skin_Not_Sun_Exposed_Suprapubic:Skin_Sun_Exposed_Lower_leg:Spleen:Stomach:Testis:Thyroid	106	Adipose_Subcutaneous:Adipose_Visceral_Omentum:Adrenal_Gland:Artery_Aorta:Artery_Tibial:Brain_Caudate_basal_ganglia:Brain_Cerebellar_Hemisphere:Brain_Cerebellum:Brain_Cortex:Brain_Hypothalamus:Brain_Nucleus_accumbens_basal_ganglia:Brain_Spinal_cord_cervical_c-1:Breast_Mammary_Tissue:Cells_Cultured_fibroblasts:Cells_EBV-transformed_lymphocytes:Colon_Sigmoid:Colon_Transverse:Esophagus_Gastroesophage…	rs7617480;rs13091206;rs9811047;rs11720542;rs4955430;rs6774724;rs6790105;rs11130190;rs9842132;rs10155014;rs9861027;rs7648995;rs2140270;rs9757181;rs11715060;rs9817807;rs13096474;rs13061396;rs940045;rs7620024;rs8897;rs6446275;rs62259933;rs7619789;rs9654010;rs57273516;rs138084484;rs4855869;rs73073004;rs113741748;rs2329025;rs1106620;rs9860055;rs72934271;rs4855853;rs4855838;rs10865956;rs11130204;rs6797…
ARPC5L	0.775599	-1.2707	0	6	Brain_Cerebellar_Hemisphere:Brain_Cerebellum:Muscle_Skeletal:Nerve_Tibial:Ovary:Pituitary:Prostate:Cells_Cultured_fibroblasts:Skin_Not_Sun_Exposed_Suprapubic:Skin_Sun_Exposed_Lower_leg:Thyroid	6	Brain_Cerebellum	rs360210;rs4838243;rs11789451;rs6478693;rs556629350;rs4837010;rs4837011;rs10986604;rs185062166;rs2807008
ASIC4	0.728515	-0.723938	0	3	Testis	NA	NA	rs13029742;rs6715064;rs7577690
ASXL1	1.3737e-18	-0.102033	0	3	Cells_Cultured_fibroblasts:Testis	3	Testis	rs62204984;rs6058534;rs6121365
ATG9A	0.714828	-0.114962	0	3	Brain_Cerebellar_Hemisphere:Brain_Cerebellum	NA	NA	rs13029742;rs6715064;rs7577690
ATRIP	0.00148698	NA	0	27	Artery_Tibial:Esophagus_Mucosa:Muscle_Skeletal:Nerve_Tibial:Skin_Not_Sun_Exposed_Suprapubic:Skin_Sun_Exposed_Lower_leg	NA	NA	rs7617480;rs13091206;rs9811047;rs11720542;rs4955430;rs6774724;rs6790105;rs11130190;rs9842132;rs10155014;rs9861027;rs7648995;rs2140270;rs9757181;rs11715060;rs9817807;rs13096474;rs13061396;rs940045;rs7620024;rs8897;rs6446275;rs62259933;rs7619789;rs9654010;rs57273516;rs138084484;rs4855869;rs73073004;rs113741748;rs2329025;rs1106620;rs9860055;rs72934271;rs4855853;rs4855838;rs10865956;rs11130204;rs6797…
BCL11A	0.829	-2.0339	0	6	Esophagus_Mucosa	NA	NA	rs907573;rs4672382;rs1029986;rs4672384;rs4672385;rs2419903
BHMT	0.000316952	-0.906174	0	4	Adipose_Subcutaneous:Adipose_Visceral_Omentum:Artery_Aorta:Brain_Caudate_basal_ganglia:Brain_Cortex:Brain_Hippocampus:Brain_Nucleus_accumbens_basal_ganglia:Brain_Putamen_basal_ganglia:Breast_Mammary_Tissue:Colon_Sigmoid:Colon_Transverse:Esophagus_Gastroesophageal_Junction:Esophagus_Muscularis:Muscle_Skeletal:Nerve_Tibial:Ovary:Pituitary:Skin_Not_Sun_Exposed_Suprapubic:Skin_Sun_Exposed_Lower_leg:T…	NA	NA	rs3733893;rs12189006;rs2607144;rs2591388;rs6453434
BHMT2	2.73917e-12	-0.153333	0	4	Muscle_Skeletal:Cells_Cultured_fibroblasts:Testis:Thyroid	NA	NA	rs3733893;rs12189006;rs2607144;rs2591388;rs6453434
BLK	2.86166e-07	-0.273662	0	3	Whole_Blood:Cells_Cultured_fibroblasts	3	Cells_EBV-transformed_lymphocytes	rs11996727;rs6601534;rs10091386
BOLA2	NA	-0.742931	0	2	Adipose_Subcutaneous:Adipose_Visceral_Omentum:Artery_Tibial:Colon_Transverse:Esophagus_Gastroesophageal_Junction:Esophagus_Mucosa:Heart_Atrial_Appendage:Lung:Muscle_Skeletal:Nerve_Tibial:Pancreas:Cells_Cultured_fibroblasts:Skin_Not_Sun_Exposed_Suprapubic:Skin_Sun_Exposed_Lower_leg:Thyroid	NA	NA	rs35105141;rs9939774
BPTF	1	0.115492	148	165	Cells_EBV-transformed_lymphocytes:Artery_Aorta:Brain_Cerebellar_Hemisphere:Brain_Cerebellum:Esophagus_Muscularis:Heart_Atrial_Appendage:Heart_Left_Ventricle:Nerve_Tibial:Skin_Sun_Exposed_Lower_leg	163	Cells_Cultured_fibroblasts	rs12603589;rs12601921;rs12601919;rs12602556;rs62084208;rs62084210;rs12449312;rs7223643;rs1976052;rs7218014;rs7221651;rs12452511;rs1976054;rs7208909;rs2052187;rs11079706;rs11079707;rs80135947;rs6504542;rs8082512;rs1966410;rs58551145;rs6504543;rs8067892;rs8074078;rs8073510;rs12450363;rs62084212;rs2365466;rs2365468;rs62084213;rs7223930;rs7224923;rs8081856;rs62084234;rs7212293;rs78452260;rs4791048;rs…
BSN	1	-1.28511	38	2	Brain_Cerebellum:Liver	NA	NA	rs7617480;rs13091206;rs9811047;rs11720542;rs4955430;rs6774724;rs6790105;rs11130190;rs9842132;rs10155014;rs9861027;rs7648995;rs2140270;rs9757181;rs11715060;rs9817807;rs13096474;rs13061396;rs940045;rs7620024;rs8897;rs6446275;rs62259933;rs7619789;rs9654010;rs57273516;rs138084484;rs4855869;rs73073004;rs113741748;rs2329025;rs1106620;rs9860055;rs72934271;rs4855853;rs4855838;rs10865956;rs11130204;rs6797…
C17orf58	0.0821564	0.225875	5	0	NA	NA	NA	rs12603589;rs12601921;rs12601919;rs12602556;rs62084208;rs62084210;rs12449312;rs7223643;rs1976052;rs7218014;rs7221651;rs12452511;rs1976054;rs7208909;rs2052187;rs11079706;rs11079707;rs80135947;rs6504542;rs8082512;rs1966410;rs58551145;rs6504543;rs8067892;rs8074078;rs8073510;rs12450363;rs62084212;rs2365466;rs2365468;rs62084213;rs7223930;rs7224923;rs8081856;rs62084234;rs7212293;rs78452260;rs4791048;rs…
C20orf112	0.973021	-1.22105	0	3	Adipose_Subcutaneous:Adrenal_Gland:Whole_Blood:Breast_Mammary_Tissue:Colon_Transverse:Lung:Nerve_Tibial:Pancreas:Prostate:Skin_Not_Sun_Exposed_Suprapubic:Skin_Sun_Exposed_Lower_leg:Spleen:Thyroid	NA	NA	rs62204984;rs6058534;rs6121365
C2ORF15	0.0131196	NA	0	1	Thyroid	NA	NA	rs4851210
C2orf54	6.76853e-06	1.42362	0	1	Lung	NA	NA	rs3755539
C3orf18	0.014308	-1.53819	0	1	Muscle_Skeletal	36	Heart_Left_Ventricle:Testis	rs11716948;rs80033912;rs7629936;rs62262671;rs55754265;rs1491983;rs11130211;rs11721148;rs1352889;rs4855833;rs62262673;rs62262675;rs6446286;rs6774202;rs3020779;rs11130217;rs11709734;rs12715437;rs11720705;rs7628207;rs9870858;rs9835157;rs7621797;rs6804970;rs9870755;rs7613603;rs62260663;rs9829155;rs9836756;rs9851651;rs9851930;rs7637711;rs28535523;rs35129566;rs61557789;rs62260723;rs59684465;rs1996664;r…
C3orf62	0.00712466	-1.95031	0	37	Adipose_Visceral_Omentum:Adrenal_Gland:Artery_Aorta	NA	NA	rs11716948;rs80033912;rs7629936;rs7617480;rs13091206;rs9811047;rs11720542;rs4955430;rs6774724;rs6790105;rs11130190;rs9842132;rs10155014;rs9861027;rs7648995;rs2140270;rs9757181;rs11715060;rs9817807;rs13096474;rs13061396;rs940045;rs7620024;rs8897;rs6446275;rs62259933;rs7619789;rs9654010;rs57273516;rs138084484;rs4855869;rs73073004;rs113741748;rs2329025;rs1106620;rs9860055;rs72934271;rs4855853;rs4855…
C3orf84	0.000221292	0.0590497	2	0	NA	NA	NA	rs7617480;rs13091206;rs9811047;rs11720542;rs4955430;rs6774724;rs6790105;rs11130190;rs9842132;rs10155014;rs9861027;rs7648995;rs2140270;rs9757181;rs11715060;rs9817807;rs13096474;rs13061396;rs940045;rs7620024;rs8897;rs6446275;rs62259933;rs7619789;rs9654010;rs57273516;rs138084484;rs4855869;rs73073004;rs113741748;rs2329025;rs1106620;rs9860055;rs72934271;rs4855853;rs4855838;rs10865956;rs11130204;rs6797…
C7orf50	0.00139621	1.0724	1	1	Adipose_Visceral_Omentum:Heart_Left_Ventricle:Cells_Cultured_fibroblasts:Skin_Not_Sun_Exposed_Suprapubic:Skin_Sun_Exposed_Lower_leg	1	Adipose_Subcutaneous:Adipose_Visceral_Omentum:Artery_Aorta:Artery_Tibial:Breast_Mammary_Tissue:Cells_Cultured_fibroblasts:Esophagus_Muscularis:Lung:Nerve_Tibial:Skin_Not_Sun_Exposed_Suprapubic:Skin_Sun_Exposed_Lower_leg:Thyroid	rs3808352
CAD	1	-0.710759	0	2	Skin_Sun_Exposed_Lower_leg	NA	NA	rs7579579;rs6547317;rs7599286;rs2384511;rs6547318;rs3820821;rs4665929;rs3820822;rs4665363;rs920437;rs920435;rs12615423;rs1992311;rs7589627;rs6759548;rs6718978;rs3739085;rs3820823;rs3739086;rs6707735;rs3739088;rs3769135;rs3769136;rs3769137;rs11126784;rs7355650;rs11126857;rs2289360;rs6547413;rs6754371;rs2304681;rs3769139;rs10185736;rs1131375;rs1057394;rs2384572;rs11691465;rs13423359;rs1866559;rs758…
CAMKV	0.996846	-0.638323	2	3	Brain_Cortex:Stomach	NA	NA	rs7617480;rs13091206;rs9811047;rs11720542;rs4955430;rs6774724;rs6790105;rs11130190;rs9842132;rs10155014;rs9861027;rs7648995;rs2140270;rs9757181;rs11715060;rs9817807;rs13096474;rs13061396;rs940045;rs7620024;rs8897;rs6446275;rs62259933;rs7619789;rs9654010;rs57273516;rs138084484;rs4855869;rs73073004;rs113741748;rs2329025;rs1106620;rs9860055;rs72934271;rs4855853;rs4855838;rs10865956;rs11130204;rs6797…
CAPNS1	0.00012438	0.00758445	0	1	Adipose_Subcutaneous	NA	NA	rs17242235;rs12463321;rs12462716;rs4586564;rs12971925;rs1226598;rs8107507;rs1038084;rs4803216;rs7256747;rs8113076;rs10407657;rs7255283;rs7259566;rs1824796;rs2891683;rs1116234;rs2927744;rs8102916
CAV2	0.00411638	0.222321	0	1	Artery_Aorta	NA	NA	rs6968125;rs62477308;rs2188541;rs62477310;rs62477311;rs10261857;rs62474669;rs62474673;rs10953781;rs62474676;rs6970620;rs12667221;rs62474683;rs56662562;rs10251192;rs59369558;rs1527743;rs17137753;rs9641538;rs1534373;rs12706031;rs7797141;rs10239094;rs62474713;rs2141233;rs4275159;rs1358394;rs10808179;rs4386905;rs12666306;rs1358393;rs34562882;rs73204027;rs73204028;rs11531592;rs73204031;rs1527737;rs115…
CCDC36	0.509349	-0.452713	1	106	Adipose_Subcutaneous:Adipose_Visceral_Omentum:Artery_Aorta:Artery_Coronary:Artery_Tibial:Breast_Mammary_Tissue:Colon_Sigmoid:Colon_Transverse:Esophagus_Gastroesophageal_Junction:Esophagus_Mucosa:Esophagus_Muscularis:Heart_Atrial_Appendage:Heart_Left_Ventricle:Lung:Muscle_Skeletal:Nerve_Tibial:Pituitary:Prostate:Spleen	NA	NA	rs7617480;rs13091206;rs9811047;rs11720542;rs4955430;rs6774724;rs6790105;rs11130190;rs9842132;rs10155014;rs9861027;rs7648995;rs2140270;rs9757181;rs11715060;rs9817807;rs13096474;rs13061396;rs940045;rs7620024;rs8897;rs6446275;rs62259933;rs7619789;rs9654010;rs57273516;rs138084484;rs4855869;rs73073004;rs113741748;rs2329025;rs1106620;rs9860055;rs72934271;rs4855853;rs4855838;rs10865956;rs11130204;rs6797…
CCDC66	8.98686e-28	0.134142	0	12	Heart_Left_Ventricle:Thyroid	10	Adipose_Subcutaneous:Artery_Tibial:Breast_Mammary_Tissue:Cells_Cultured_fibroblasts:Esophagus_Muscularis:Muscle_Skeletal:Skin_Sun_Exposed_Lower_leg	rs7623143;rs34392996;rs35341271;rs56135751;rs35102305;rs35215252;rs12633004;rs113062903;rs7640618;rs17825368;rs2123180;rs6763275;rs12629096;rs11707881;rs41521744;rs11720894;rs2123181;rs60900173;rs1869158;rs1869159;rs12638786;rs17235494;rs34270989;rs12637784;rs36044157;rs11712446;rs34715192;rs4974206;rs11920229;rs55952137;rs6776240
CCDC71	0.0169896	NA	1	70	Adipose_Subcutaneous:Whole_Blood:Brain_Amygdala:Brain_Caudate_basal_ganglia:Brain_Cerebellar_Hemisphere:Brain_Cerebellum:Brain_Frontal_Cortex_BA9:Brain_Nucleus_accumbens_basal_ganglia:Brain_Putamen_basal_ganglia:Breast_Mammary_Tissue:Nerve_Tibial:Skin_Not_Sun_Exposed_Suprapubic:Skin_Sun_Exposed_Lower_leg:Thyroid	NA	NA	rs7617480;rs13091206;rs9811047;rs11720542;rs4955430;rs6774724;rs6790105;rs11130190;rs9842132;rs10155014;rs9861027;rs7648995;rs2140270;rs9757181;rs11715060;rs9817807;rs13096474;rs13061396;rs940045;rs7620024;rs8897;rs6446275;rs62259933;rs7619789;rs9654010;rs57273516;rs138084484;rs4855869;rs73073004;rs113741748;rs2329025;rs1106620;rs9860055;rs72934271;rs4855853;rs4855838;rs10865956;rs11130204;rs6797…
CDHR4	0.0134739	0.0436097	7	106	Artery_Aorta:Artery_Tibial:Colon_Sigmoid:Nerve_Tibial:Skin_Not_Sun_Exposed_Suprapubic:Skin_Sun_Exposed_Lower_leg:Testis	3	Testis	rs7617480;rs13091206;rs9811047;rs11720542;rs4955430;rs6774724;rs6790105;rs11130190;rs9842132;rs10155014;rs9861027;rs7648995;rs2140270;rs9757181;rs11715060;rs9817807;rs13096474;rs13061396;rs940045;rs7620024;rs8897;rs6446275;rs62259933;rs7619789;rs9654010;rs57273516;rs138084484;rs4855869;rs73073004;rs113741748;rs2329025;rs1106620;rs9860055;rs72934271;rs4855853;rs4855838;rs10865956;rs11130204;rs6797…
CELSR3	0.999656	-0.878908	0	54	Adipose_Subcutaneous	NA	NA	rs7617480;rs13091206;rs9811047;rs11720542;rs4955430;rs6774724;rs6790105;rs11130190;rs9842132;rs10155014;rs9861027;rs7648995;rs2140270;rs9757181;rs11715060;rs9817807;rs13096474;rs13061396;rs940045;rs7620024;rs8897;rs6446275;rs62259933;rs7619789;rs9654010;rs57273516;rs138084484;rs4855869;rs73073004;rs113741748;rs2329025;rs1106620;rs9860055;rs72934271;rs4855853;rs4855838;rs10865956;rs11130204;rs6797…
CEP192	7.43869e-10	-0.373132	37	26	Adipose_Subcutaneous:Adipose_Visceral_Omentum:Adrenal_Gland:Cells_EBV-transformed_lymphocytes:Whole_Blood:Artery_Aorta:Artery_Coronary:Artery_Tibial:Brain_Amygdala:Brain_Anterior_cingulate_cortex_BA24:Brain_Caudate_basal_ganglia:Brain_Cerebellar_Hemisphere:Brain_Cerebellum:Brain_Cortex:Brain_Frontal_Cortex_BA9:Brain_Hippocampus:Brain_Hypothalamus:Brain_Nucleus_accumbens_basal_ganglia:Brain_Putame…	26	Adipose_Subcutaneous:Adipose_Visceral_Omentum:Artery_Aorta:Artery_Tibial:Brain_Cerebellum:Breast_Mammary_Tissue:Cells_Cultured_fibroblasts:Colon_Sigmoid:Colon_Transverse:Esophagus_Gastroesophageal_Junction:Lung:Nerve_Tibial:Ovary:Prostate:Skin_Not_Sun_Exposed_Suprapubic:Skin_Sun_Exposed_Lower_leg:Stomach:Testis:Thyroid:Vagina	rs9748518;rs9748528;rs9748873;rs7243660;rs8097125;rs7234094;rs6505777;rs7226616;rs7237236;rs7234960;rs11080620;rs9964466;rs7241536;rs10221326;rs8097038;rs478006;rs1787008;rs556536;rs565832;rs472992;rs567031;rs692964;rs7243000;rs8086346;rs490853;rs1786263
CGREF1	5.50291e-08	0.491986	58	43	Whole_Blood:Esophagus_Mucosa:Muscle_Skeletal:Ovary:Pituitary:Cells_Cultured_fibroblasts:Skin_Not_Sun_Exposed_Suprapubic:Skin_Sun_Exposed_Lower_leg:Spleen	43	Brain_Anterior_cingulate_cortex_BA24:Brain_Caudate_basal_ganglia:Brain_Cerebellar_Hemisphere:Brain_Cerebellum:Brain_Cortex:Brain_Frontal_Cortex_BA9:Brain_Hippocampus:Brain_Hypothalamus:Brain_Nucleus_accumbens_basal_ganglia:Brain_Putamen_basal_ganglia:Cells_Cultured_fibroblasts:Muscle_Skeletal:Nerve_Tibial:Ovary	rs7579579;rs6547317;rs7599286;rs2384511;rs6547318;rs3820821;rs4665929;rs3820822;rs4665363;rs920437;rs920435;rs12615423;rs1992311;rs7589627;rs6759548;rs6718978;rs3739085;rs3820823;rs3739086;rs6707735;rs3739088;rs3769135;rs3769136;rs3769137;rs11126784;rs7355650;rs11126857;rs2289360;rs6547413;rs6754371;rs2304681;rs3769139;rs10185736;rs1131375;rs1057394;rs2384572;rs11691465;rs13423359;rs1866559;rs758…
CHD1L	1.05042e-20	0.802666	0	2	Whole_Blood:Esophagus_Muscularis:Muscle_Skeletal:Cells_Cultured_fibroblasts	1	Muscle_Skeletal	rs12126629;rs10399871
CLDN10	0.0459304	NA	0	29	Adipose_Subcutaneous:Adipose_Visceral_Omentum:Whole_Blood:Artery_Tibial	38	Pancreas	rs2389631;rs7981931;rs7337506;rs1925119;rs7981845;rs9556550;rs4771932;rs7323056;rs1925115;rs9556554;rs9556555;rs9554338;rs1010345;rs7991843;rs12871045;rs9554340;rs9556559;rs7996549;rs7320054;rs35092596;rs34818702;rs9556567;rs12866328;rs12871890;rs7982697;rs12583996;rs7328493;rs1475296;rs927710;rs1925107;rs9556575;rs9556576;rs61966957;rs1925104;rs9554349;rs1925100;rs1925099;rs7324569;rs7323705
CNPPD1	1.63494e-05	0.366854	5	3	Cells_EBV-transformed_lymphocytes:Brain_Cerebellar_Hemisphere:Brain_Cerebellum:Brain_Hippocampus:Brain_Hypothalamus:Brain_Putamen_basal_ganglia:Brain_Spinal_cord_cervical_c-1:Brain_Substantia_nigra:Nerve_Tibial	3	Brain_Spinal_cord_cervical_c-1:Skin_Sun_Exposed_Lower_leg:Testis:Whole_Blood	rs13029742;rs6715064;rs7577690
CSMD3	1	0.201288	0	7	Nerve_Tibial:Pituitary	2	Testis	rs4876517;rs734622;rs10110825;rs10111038;rs28825376;rs10103955;rs1596332
CTC-454I21.3	NA	NA	2	0	NA	NA	NA	rs17242235;rs12463321;rs12462716;rs4586564;rs12971925;rs1226598;rs8107507;rs1038084;rs4803216;rs7256747;rs8113076;rs10407657;rs7255283;rs7259566;rs1824796;rs2891683;rs1116234;rs2927744;rs8102916
CTD-2162K18.4	NA	NA	0	7	Brain_Cerebellar_Hemisphere:Brain_Cerebellum:Heart_Atrial_Appendage:Heart_Left_Ventricle:Thyroid	NA	NA	rs17242235;rs12463321;rs12462716;rs4586564;rs12971925;rs1226598;rs8107507;rs1038084;rs4803216;rs7256747;rs8113076;rs10407657;rs7255283;rs7259566;rs1824796;rs2891683;rs2385119;rs1116234;rs2927744;rs8102916
CTD-2330K9.3	NA	NA	0	66	Artery_Aorta:Colon_Transverse	NA	NA	rs7617480;rs13091206;rs9811047;rs11720542;rs4955430;rs6774724;rs6790105;rs11130190;rs9842132;rs10155014;rs9861027;rs7648995;rs2140270;rs9757181;rs11715060;rs9817807;rs13096474;rs13061396;rs940045;rs7620024;rs8897;rs6446275;rs62259933;rs7619789;rs9654010;rs57273516;rs138084484;rs4855869;rs73073004;rs113741748;rs2329025;rs1106620;rs9860055;rs72934271;rs4855853;rs4855838;rs10865956;rs11130204;rs6797…
CYB561D2	0.0147105	-0.298456	0	3	Adipose_Subcutaneous	NA	NA	rs11716948;rs80033912;rs7629936
DAG1	0.940922	-0.838742	7	103	Esophagus_Mucosa:Heart_Left_Ventricle:Cells_Cultured_fibroblasts	NA	NA	rs7617480;rs13091206;rs9811047;rs11720542;rs4955430;rs6774724;rs6790105;rs11130190;rs9842132;rs10155014;rs9861027;rs7648995;rs2140270;rs9757181;rs11715060;rs9817807;rs13096474;rs13061396;rs940045;rs7620024;rs8897;rs6446275;rs62259933;rs7619789;rs9654010;rs57273516;rs138084484;rs4855869;rs73073004;rs113741748;rs2329025;rs1106620;rs9860055;rs72934271;rs4855853;rs4855838;rs10865956;rs11130204;rs6797…
DALRD3	1.84814e-05	0.0723068	0	106	Adipose_Subcutaneous:Adipose_Visceral_Omentum:Artery_Aorta:Artery_Coronary:Artery_Tibial:Brain_Anterior_cingulate_cortex_BA24:Brain_Cerebellar_Hemisphere:Brain_Cerebellum:Brain_Cortex:Breast_Mammary_Tissue:Colon_Transverse:Esophagus_Gastroesophageal_Junction:Esophagus_Mucosa:Esophagus_Muscularis:Heart_Atrial_Appendage:Liver:Lung:Muscle_Skeletal:Nerve_Tibial:Pancreas:Cells_Cultured_fibroblasts:Spl…	NA	NA	rs7617480;rs13091206;rs9811047;rs11720542;rs4955430;rs6774724;rs6790105;rs11130190;rs9842132;rs10155014;rs9861027;rs7648995;rs2140270;rs9757181;rs11715060;rs9817807;rs13096474;rs13061396;rs940045;rs7620024;rs8897;rs6446275;rs62259933;rs7619789;rs9654010;rs57273516;rs138084484;rs4855869;rs73073004;rs113741748;rs2329025;rs1106620;rs9860055;rs72934271;rs4855853;rs4855838;rs10865956;rs11130204;rs6797…
DCC	0.999999	-0.23995	140	89	Nerve_Tibial	103	Testis	rs62097899;rs62097903;rs56796226;rs34569535;rs11663694;rs7506245;rs11661483;rs62097950;rs4129439;rs62099173;rs4506980;rs4510098;rs4468701;rs11663393;rs4291980;rs4459619;rs62099183;rs4321259;rs4494619;rs11659803;rs5020052;rs4414555;rs4343352;rs8089828;rs4939722;rs17486305;rs17408393;rs17487256;rs7232543;rs7233123;rs62099230;rs10221371;rs60939828;rs62099234;rs62099235;rs62099236;rs7227069;rs6210076…
DMGDH	8.90328e-17	-0.360663	2	4	Adipose_Subcutaneous:Adipose_Visceral_Omentum:Brain_Caudate_basal_ganglia:Brain_Cortex:Brain_Frontal_Cortex_BA9:Brain_Nucleus_accumbens_basal_ganglia:Brain_Putamen_basal_ganglia:Colon_Sigmoid:Heart_Atrial_Appendage:Muscle_Skeletal:Nerve_Tibial:Cells_Cultured_fibroblasts:Skin_Not_Sun_Exposed_Suprapubic:Skin_Sun_Exposed_Lower_leg:Spleen:Thyroid	NA	NA	rs3733893;rs12189006;rs2607144;rs2591388;rs6453434
DNAJC3	0.951081	-0.646266	0	38	Adipose_Subcutaneous:Artery_Tibial:Esophagus_Mucosa:Nerve_Tibial:Pancreas:Cells_Cultured_fibroblasts:Skin_Not_Sun_Exposed_Suprapubic:Skin_Sun_Exposed_Lower_leg	NA	NA	rs2389631;rs7981931;rs7337506;rs1925119;rs7981845;rs9556550;rs4771932;rs7323056;rs1925115;rs9556554;rs9556555;rs9554338;rs1010345;rs7991843;rs12871045;rs9554340;rs9556559;rs7996549;rs7320054;rs35092596;rs34818702;rs9556567;rs12866328;rs12871890;rs7982697;rs12583996;rs7328493;rs1475296;rs927710;rs1925107;rs9556575;rs9556576;rs61966957;rs1925104;rs9554349;rs1925100;rs1925099;rs7324569;rs7323705
DOC2A	0.0185536	NA	0	2	Adipose_Visceral_Omentum:Adrenal_Gland:Artery_Aorta:Colon_Transverse:Esophagus_Gastroesophageal_Junction:Esophagus_Mucosa:Esophagus_Muscularis:Lung:Pancreas:Skin_Not_Sun_Exposed_Suprapubic:Small_Intestine_Terminal_Ileum:Spleen:Stomach:Thyroid	2	Brain_Cerebellum:Brain_Cortex:Testis	rs35105141;rs9939774
DOCK3	1	-0.836765	0	5	Lung	NA	NA	rs7617480;rs13091206;rs9811047;rs11720542;rs4955430;rs6774724;rs6790105;rs11130190;rs9842132;rs10155014;rs9861027;rs7648995;rs2140270;rs9757181;rs11715060;rs9817807;rs13096474;rs13061396;rs940045;rs7620024;rs8897;rs6446275;rs62259933;rs7619789;rs9654010;rs57273516;rs138084484;rs4855869;rs73073004;rs113741748;rs2329025;rs1106620;rs9860055;rs72934271;rs4855853;rs4855838;rs10865956;rs11130204;rs6797…
DPYD	4.18972e-09	0.587602	51	141	Esophagus_Mucosa:Skin_Not_Sun_Exposed_Suprapubic:Skin_Sun_Exposed_Lower_leg	NA	NA	rs4375301;rs10747488;rs7526108;rs6658412;rs61787782;rs12072739;rs4421623;rs12089031;rs4970719;rs10747489;rs4372296;rs4379706;rs10747490;rs11165920;rs4970720;rs75641275;rs4523551;rs4523552;rs76586805;rs61787783;rs61787784;rs11165921;rs9661794;rs6677116;rs10747491;rs4970721;rs10747492;rs12062845;rs61787819;rs61787820;rs7524038;rs10875113;rs1801265;rs4970723;rs9324374;rs12406713;rs7418577;rs10875118…
DPYSL5	0.998332	-1.35954	25	43	Brain_Cerebellar_Hemisphere:Brain_Cerebellum:Brain_Cortex:Brain_Frontal_Cortex_BA9:Brain_Hippocampus:Brain_Putamen_basal_ganglia:Brain_Spinal_cord_cervical_c-1:Brain_Substantia_nigra:Muscle_Skeletal	NA	NA	rs7579579;rs6547317;rs7599286;rs2384511;rs6547318;rs3820821;rs4665929;rs3820822;rs4665363;rs920437;rs920435;rs12615423;rs1992311;rs7589627;rs6759548;rs6718978;rs3739085;rs3820823;rs3739086;rs6707735;rs3739088;rs3769135;rs3769136;rs3769137;rs11126784;rs7355650;rs11126857;rs2289360;rs6547413;rs6754371;rs2304681;rs3769139;rs10185736;rs1131375;rs1057394;rs2384572;rs11691465;rs13423359;rs1866559;rs758…
DRD2	0.733264	NA	59	25	Adipose_Subcutaneous:Adipose_Visceral_Omentum:Colon_Sigmoid:Colon_Transverse:Esophagus_Gastroesophageal_Junction:Esophagus_Muscularis:Muscle_Skeletal:Stomach	NA	NA	rs10891538;rs11493880;rs35023999;rs34863235;rs7118900;rs10891547;rs10891548;rs11604671;rs2734849;rs1800497;rs11214599;rs11214601;rs2511520;rs2242593;rs2242591;rs6278;rs1124491;rs1079595;rs1079594;rs1076560;rs2283265;rs2075654;rs1079727;rs2734836;rs1962262;rs1079598;rs1079597;rs1079596;rs1125394;rs1125393;rs2471857;rs2471851;rs7103679;rs7350522;rs11214594;rs11214595;rs17600713;rs34601878;rs1236099…
EIF5B	0.895388	-0.523224	0	1	Cells_Cultured_fibroblasts	NA	NA	rs4851210
EMILIN1	0.00521656	NA	6	32	Whole_Blood	NA	NA	rs7579579;rs6547317;rs7599286;rs2384511;rs6547318;rs3820821;rs4665929;rs3820822;rs4665363;rs920437;rs920435;rs12615423;rs1992311;rs7589627;rs6759548;rs6718978;rs3739085;rs3820823;rs3739086;rs6707735;rs3739088;rs3769135;rs3769136;rs3769137;rs11126784;rs7355650;rs11126857;rs2289360;rs6547413;rs6754371;rs2304681;rs3769139;rs10185736;rs1131375;rs1057394;rs2384572;rs11691465;rs13423359;rs1866559;rs758…
ERC2	0.996856	-1.91547	31	1	Brain_Cerebellum	NA	NA	rs7623143;rs34392996;rs35341271;rs56135751;rs35102305;rs35215252;rs12633004;rs113062903;rs7640618;rs17825368;rs2123180;rs6763275;rs12629096;rs11707881;rs41521744;rs11720894;rs2123181;rs60900173;rs1869158;rs1869159;rs12638786;rs17235494;rs34270989;rs12637784;rs36044157;rs11712446;rs34715192;rs4974206;rs11920229;rs55952137;rs6776240
ESR1	0.987167	-1.05687	18	5	Brain_Caudate_basal_ganglia	NA	NA	rs6557168;rs3757323;rs9479138;rs11155821;rs4869748;rs2347923;rs2347867;rs4870060;rs6557171;rs12204714;rs4870062;rs4305732;rs4870063;rs1913475;rs6927072;rs9371564;rs6911230;rs3020408
FAM134A	0.75859	1.49887	3	3	Adipose_Subcutaneous:Artery_Tibial:Brain_Cerebellar_Hemisphere:Brain_Cerebellum:Brain_Spinal_cord_cervical_c-1:Breast_Mammary_Tissue:Esophagus_Mucosa:Lung:Muscle_Skeletal:Nerve_Tibial:Pancreas:Pituitary:Skin_Not_Sun_Exposed_Suprapubic:Skin_Sun_Exposed_Lower_leg:Stomach:Thyroid	NA	NA	rs13029742;rs6715064;rs7577690
FAM167A	0.000192998	0.911878	0	3	Whole_Blood:Brain_Frontal_Cortex_BA9:Cells_Cultured_fibroblasts:Skin_Sun_Exposed_Lower_leg	NA	NA	rs11996727;rs6601534;rs10091386
FAM208A	0.999672	NA	0	12	Artery_Tibial:Nerve_Tibial:Cells_Cultured_fibroblasts	NA	NA	rs7623143;rs34392996;rs35341271;rs56135751;rs35102305;rs35215252;rs12633004;rs113062903;rs7640618;rs17825368;rs2123180;rs6763275;rs12629096;rs11707881;rs41521744;rs11720894;rs2123181;rs60900173;rs1869158;rs1869159;rs12638786;rs17235494;rs34270989;rs12637784;rs36044157;rs11712446;rs34715192;rs4974206;rs11920229;rs55952137;rs6776240
FAM212A	0.000589161	NA	5	106	Artery_Aorta:Brain_Cerebellar_Hemisphere:Brain_Cerebellum:Brain_Nucleus_accumbens_basal_ganglia:Esophagus_Mucosa:Muscle_Skeletal:Cells_Cultured_fibroblasts:Skin_Not_Sun_Exposed_Suprapubic:Skin_Sun_Exposed_Lower_leg:Testis	NA	NA	rs7617480;rs13091206;rs9811047;rs11720542;rs4955430;rs6774724;rs6790105;rs11130190;rs9842132;rs10155014;rs9861027;rs7648995;rs2140270;rs9757181;rs11715060;rs9817807;rs13096474;rs13061396;rs940045;rs7620024;rs8897;rs6446275;rs62259933;rs7619789;rs9654010;rs57273516;rs138084484;rs4855869;rs73073004;rs113741748;rs2329025;rs1106620;rs9860055;rs72934271;rs4855853;rs4855838;rs10865956;rs11130204;rs6797…
FAM57B	0.285736	NA	2	2	Esophagus_Muscularis:Muscle_Skeletal	2	Brain_Cerebellum:Testis	rs35105141;rs9939774
FBXW12	1.97458e-07	0.783335	0	1	Testis	NA	NA	rs7617480;rs13091206;rs9811047;rs11720542;rs4955430;rs6774724;rs6790105;rs11130190;rs9842132;rs10155014;rs9861027;rs7648995;rs2140270;rs9757181;rs11715060;rs9817807;rs13096474;rs13061396;rs940045;rs7620024;rs8897;rs6446275;rs62259933;rs7619789;rs9654010;rs57273516;rs138084484;rs4855869;rs73073004;rs113741748;rs2329025;rs1106620;rs9860055;rs72934271;rs4855853;rs4855838;rs10865956;rs11130204;rs6797…
FDFT1	NA	1.28566	0	3	Artery_Tibial	NA	NA	rs11996727;rs6601534;rs10091386
FES	2.7739e-05	NA	1	1	Adipose_Visceral_Omentum:Whole_Blood:Artery_Tibial:Lung:Nerve_Tibial:Pancreas:Cells_Cultured_fibroblasts:Skin_Not_Sun_Exposed_Suprapubic:Skin_Sun_Exposed_Lower_leg:Thyroid	1	Adipose_Subcutaneous:Adipose_Visceral_Omentum:Artery_Aorta:Artery_Coronary:Breast_Mammary_Tissue:Colon_Sigmoid:Esophagus_Muscularis:Heart_Atrial_Appendage:Heart_Left_Ventricle:Lung:Nerve_Tibial:Prostate:Skin_Sun_Exposed_Lower_leg:Small_Intestine_Terminal_Ileum:Spleen:Thyroid:Whole_Blood	rs4702
FMO5	3.69166e-15	-0.103126	0	2	Artery_Aorta:Artery_Tibial:Esophagus_Mucosa:Heart_Atrial_Appendage:Thyroid	NA	NA	rs12126629;rs10399871
FOXP2	0.996179	-0.404517	2	0	NA	NA	NA	rs74439139;rs76086831
FURIN	0.999933	-0.15638	1	1	Artery_Tibial:Brain_Frontal_Cortex_BA9:Esophagus_Mucosa:Cells_Cultured_fibroblasts	NA	NA	rs4702
GAPVD1	1	-0.165866	0	6	Whole_Blood:Artery_Tibial:Brain_Cerebellar_Hemisphere:Brain_Cerebellum:Muscle_Skeletal:Nerve_Tibial:Skin_Not_Sun_Exposed_Suprapubic:Skin_Sun_Exposed_Lower_leg:Thyroid	NA	NA	rs360210;rs4838243;rs11789451;rs6478693;rs556629350;rs4837010;rs4837011;rs10986604;rs185062166;rs2807008
GDPD3	1.05165e-07	-0.375161	0	2	Adrenal_Gland:Whole_Blood:Cells_Cultured_fibroblasts	2	Pituitary	rs35105141;rs9939774
GLB1L	2.51566e-10	0.0203894	0	3	Adipose_Subcutaneous:Whole_Blood:Artery_Tibial:Esophagus_Gastroesophageal_Junction:Esophagus_Mucosa:Nerve_Tibial:Spleen	NA	NA	rs13029742;rs6715064;rs7577690
GMPPB	8.24536e-05	-0.659554	5	104	Adipose_Subcutaneous:Adipose_Visceral_Omentum:Adrenal_Gland:Whole_Blood:Artery_Aorta:Artery_Coronary:Artery_Tibial:Brain_Amygdala:Brain_Anterior_cingulate_cortex_BA24:Brain_Caudate_basal_ganglia:Brain_Cerebellar_Hemisphere:Brain_Cerebellum:Brain_Cortex:Brain_Frontal_Cortex_BA9:Brain_Hippocampus:Brain_Hypothalamus:Brain_Nucleus_accumbens_basal_ganglia:Brain_Putamen_basal_ganglia:Brain_Spinal_cord_…	NA	NA	rs7617480;rs13091206;rs9811047;rs11720542;rs4955430;rs6774724;rs6790105;rs11130190;rs9842132;rs10155014;rs9861027;rs7648995;rs2140270;rs9757181;rs11715060;rs9817807;rs13096474;rs13061396;rs940045;rs7620024;rs8897;rs6446275;rs62259933;rs7619789;rs9654010;rs57273516;rs138084484;rs4855869;rs73073004;rs113741748;rs2329025;rs1106620;rs9860055;rs72934271;rs4855853;rs4855838;rs10865956;rs11130204;rs6797…
GOLGA1	0.00610739	-0.699248	0	6	Adipose_Subcutaneous:Artery_Aorta:Artery_Tibial:Brain_Cerebellar_Hemisphere:Brain_Cerebellum:Colon_Sigmoid:Colon_Transverse:Esophagus_Gastroesophageal_Junction:Esophagus_Muscularis:Lung:Muscle_Skeletal:Prostate:Skin_Not_Sun_Exposed_Suprapubic:Stomach	1	Skin_Sun_Exposed_Lower_leg	rs360210;rs4838243;rs11789451;rs6478693;rs556629350;rs4837010;rs4837011;rs10986604;rs185062166;rs2807008
GPER1	0.725421	0.809124	1	1	Testis	NA	NA	rs3808352
GPR146	0.00279413	0.3554	0	1	Whole_Blood	1	Adipose_Subcutaneous	rs3808352
GPX1	0.00693165	-0.616399	2	106	Adrenal_Gland:Artery_Aorta:Artery_Tibial:Brain_Anterior_cingulate_cortex_BA24:Brain_Caudate_basal_ganglia:Brain_Cerebellar_Hemisphere:Brain_Cerebellum:Brain_Cortex:Brain_Frontal_Cortex_BA9:Brain_Hippocampus:Brain_Nucleus_accumbens_basal_ganglia:Brain_Putamen_basal_ganglia:Colon_Transverse:Esophagus_Mucosa:Esophagus_Muscularis:Lung:Pituitary:Cells_Cultured_fibroblasts:Skin_Not_Sun_Exposed_Suprapub…	NA	NA	rs7617480;rs13091206;rs9811047;rs11720542;rs4955430;rs6774724;rs6790105;rs11130190;rs9842132;rs10155014;rs9861027;rs7648995;rs2140270;rs9757181;rs11715060;rs9817807;rs13096474;rs13061396;rs940045;rs7620024;rs8897;rs6446275;rs62259933;rs7619789;rs9654010;rs57273516;rs138084484;rs4855869;rs73073004;rs113741748;rs2329025;rs1106620;rs9860055;rs72934271;rs4855853;rs4855838;rs10865956;rs11130204;rs6797…
HEMK1	8.23153e-05	-2.53452	0	3	Whole_Blood:Lung:Nerve_Tibial	NA	NA	rs7617480;rs13091206;rs9811047;rs11720542;rs4955430;rs6774724;rs6790105;rs11130190;rs9842132;rs10155014;rs9861027;rs7648995;rs2140270;rs9757181;rs11715060;rs9817807;rs13096474;rs13061396;rs940045;rs7620024;rs8897;rs6446275;rs62259933;rs7619789;rs9654010;rs57273516;rs138084484;rs4855869;rs73073004;rs113741748;rs2329025;rs1106620;rs9860055;rs72934271;rs4855853;rs4855838;rs10865956;rs11130204;rs6797…
HKR1	2.71837e-10	-0.700981	1	15	Adrenal_Gland:Whole_Blood:Cells_Cultured_fibroblasts	5	Adipose_Visceral_Omentum:Adrenal_Gland:Breast_Mammary_Tissue:Colon_Sigmoid:Esophagus_Mucosa:Skin_Sun_Exposed_Lower_leg:Spleen:Thyroid	rs17242235;rs12463321;rs12462716;rs4586564;rs12971925;rs1226598;rs8107507;rs1038084;rs4803216;rs7256747;rs8113076;rs10407657;rs7255283;rs7259566;rs1824796;rs2891683;rs2385119;rs1116234;rs2927744;rs8102916
HS6ST3	0.747378	NA	39	38	Adipose_Subcutaneous:Adipose_Visceral_Omentum:Artery_Aorta:Artery_Tibial:Nerve_Tibial:Thyroid	NA	NA	rs2389631;rs7981931;rs7337506;rs1925119;rs7981845;rs9556550;rs4771932;rs7323056;rs1925115;rs9556554;rs9556555;rs9554338;rs1010345;rs7991843;rs12871045;rs9554340;rs9556559;rs7996549;rs7320054;rs35092596;rs34818702;rs9556567;rs12866328;rs12871890;rs7982697;rs12583996;rs7328493;rs1475296;rs927710;rs1925107;rs9556575;rs9556576;rs61966957;rs1925104;rs9554349;rs1925100;rs1925099;rs7324569;rs7323705
HYAL1	0.00553671	0.476164	0	2	Skin_Sun_Exposed_Lower_leg:Spleen	NA	NA	rs11716948;rs80033912;rs7629936
HYAL3	1.52466e-05	-0.35315	0	99	Adipose_Subcutaneous:Whole_Blood:Artery_Aorta:Artery_Coronary:Artery_Tibial:Brain_Cerebellum:Brain_Spinal_cord_cervical_c-1:Breast_Mammary_Tissue:Colon_Sigmoid:Colon_Transverse:Esophagus_Gastroesophageal_Junction:Esophagus_Mucosa:Esophagus_Muscularis:Heart_Atrial_Appendage:Nerve_Tibial:Pancreas:Cells_Cultured_fibroblasts:Skin_Not_Sun_Exposed_Suprapubic:Skin_Sun_Exposed_Lower_leg:Small_Intestine_T…	7	Brain_Cortex:Skin_Sun_Exposed_Lower_leg	rs7617480;rs13091206;rs9811047;rs11720542;rs4955430;rs6774724;rs6790105;rs11130190;rs9842132;rs10155014;rs9861027;rs7648995;rs2140270;rs9757181;rs11715060;rs9817807;rs13096474;rs13061396;rs940045;rs7620024;rs8897;rs6446275;rs62259933;rs7619789;rs9654010;rs57273516;rs138084484;rs4855869;rs73073004;rs113741748;rs2329025;rs1106620;rs9860055;rs72934271;rs4855853;rs4855838;rs10865956;rs11130204;rs6797…
IHH	0.349924	-0.391031	0	3	Brain_Cerebellum:Esophagus_Mucosa:Nerve_Tibial:Skin_Sun_Exposed_Lower_leg	NA	NA	rs13029742;rs6715064;rs7577690
IMPDH2	0.00135317	-0.509343	0	64	Cells_Cultured_fibroblasts	NA	NA	rs7617480;rs13091206;rs9811047;rs11720542;rs4955430;rs6774724;rs6790105;rs11130190;rs9842132;rs10155014;rs9861027;rs7648995;rs2140270;rs9757181;rs11715060;rs9817807;rs13096474;rs13061396;rs940045;rs7620024;rs8897;rs6446275;rs62259933;rs7619789;rs9654010;rs57273516;rs138084484;rs4855869;rs73073004;rs113741748;rs2329025;rs1106620;rs9860055;rs72934271;rs4855853;rs4855838;rs10865956;rs11130204;rs6797…
INO80E	0.0174147	-1.07729	0	2	Adipose_Subcutaneous:Adipose_Visceral_Omentum:Whole_Blood:Artery_Aorta:Artery_Coronary:Artery_Tibial:Brain_Anterior_cingulate_cortex_BA24:Brain_Caudate_basal_ganglia:Brain_Cerebellar_Hemisphere:Brain_Cerebellum:Brain_Cortex:Brain_Frontal_Cortex_BA9:Brain_Nucleus_accumbens_basal_ganglia:Brain_Putamen_basal_ganglia:Breast_Mammary_Tissue:Colon_Sigmoid:Colon_Transverse:Esophagus_Gastroesophageal_Junc…	2	Adipose_Subcutaneous:Adipose_Visceral_Omentum:Adrenal_Gland:Artery_Aorta:Artery_Coronary:Artery_Tibial:Breast_Mammary_Tissue:Cells_Cultured_fibroblasts:Colon_Transverse:Esophagus_Gastroesophageal_Junction:Esophagus_Mucosa:Esophagus_Muscularis:Heart_Atrial_Appendage:Lung:Minor_Salivary_Gland:Nerve_Tibial:Ovary:Pancreas:Pituitary:Prostate:Skin_Not_Sun_Exposed_Suprapubic:Skin_Sun_Exposed_Lower_leg:S…	rs35105141;rs9939774
IP6K1	0.23518	-2.10343	18	103	Adipose_Subcutaneous:Adipose_Visceral_Omentum:Artery_Tibial:Esophagus_Gastroesophageal_Junction:Esophagus_Muscularis:Muscle_Skeletal:Nerve_Tibial:Skin_Not_Sun_Exposed_Suprapubic:Skin_Sun_Exposed_Lower_leg:Thyroid	106	Cells_Cultured_fibroblasts:Testis	rs7617480;rs13091206;rs9811047;rs11720542;rs4955430;rs6774724;rs6790105;rs11130190;rs9842132;rs10155014;rs9861027;rs7648995;rs2140270;rs9757181;rs11715060;rs9817807;rs13096474;rs13061396;rs940045;rs7620024;rs8897;rs6446275;rs62259933;rs7619789;rs9654010;rs57273516;rs138084484;rs4855869;rs73073004;rs113741748;rs2329025;rs1106620;rs9860055;rs72934271;rs4855853;rs4855838;rs10865956;rs11130204;rs6797…
JMY	0.999723	-1.04523	5	4	Whole_Blood:Brain_Cerebellar_Hemisphere:Brain_Cerebellum:Colon_Transverse:Cells_Cultured_fibroblasts:Testis	NA	NA	rs3733893;rs12189006;rs2607144;rs2591388;rs6453434
KHK	5.36079e-05	NA	34	43	Adipose_Subcutaneous:Adipose_Visceral_Omentum:Adrenal_Gland:Cells_EBV-transformed_lymphocytes:Whole_Blood:Artery_Aorta:Artery_Coronary:Artery_Tibial:Brain_Caudate_basal_ganglia:Brain_Cortex:Brain_Nucleus_accumbens_basal_ganglia:Brain_Putamen_basal_ganglia:Breast_Mammary_Tissue:Colon_Sigmoid:Colon_Transverse:Esophagus_Gastroesophageal_Junction:Esophagus_Mucosa:Esophagus_Muscularis:Heart_Atrial_App…	43	Brain_Anterior_cingulate_cortex_BA24:Brain_Cerebellar_Hemisphere:Brain_Cerebellum:Brain_Cortex:Brain_Frontal_Cortex_BA9:Brain_Nucleus_accumbens_basal_ganglia:Testis	rs7579579;rs6547317;rs7599286;rs2384511;rs6547318;rs3820821;rs4665929;rs3820822;rs4665363;rs920437;rs920435;rs12615423;rs1992311;rs7589627;rs6759548;rs6718978;rs3739085;rs3820823;rs3739086;rs6707735;rs3739088;rs3769135;rs3769136;rs3769137;rs11126784;rs7355650;rs11126857;rs2289360;rs6547413;rs6754371;rs2304681;rs3769139;rs10185736;rs1131375;rs1057394;rs2384572;rs11691465;rs13423359;rs1866559;rs758…
KIF1A	0.999989	0.066192	1	0	NA	NA	NA	rs3755539
KLHDC8B	0.0104214	-0.0773522	1	106	Adipose_Subcutaneous:Cells_EBV-transformed_lymphocytes:Artery_Tibial:Brain_Cerebellum:Colon_Sigmoid:Esophagus_Gastroesophageal_Junction:Esophagus_Mucosa:Esophagus_Muscularis:Lung:Muscle_Skeletal:Nerve_Tibial:Ovary:Pancreas:Cells_Cultured_fibroblasts:Skin_Not_Sun_Exposed_Suprapubic:Skin_Sun_Exposed_Lower_leg:Thyroid:Uterus	NA	NA	rs7617480;rs13091206;rs9811047;rs11720542;rs4955430;rs6774724;rs6790105;rs11130190;rs9842132;rs10155014;rs9861027;rs7648995;rs2140270;rs9757181;rs11715060;rs9817807;rs13096474;rs13061396;rs940045;rs7620024;rs8897;rs6446275;rs62259933;rs7619789;rs9654010;rs57273516;rs138084484;rs4855869;rs73073004;rs113741748;rs2329025;rs1106620;rs9860055;rs72934271;rs4855853;rs4855838;rs10865956;rs11130204;rs6797…
KPNA2	0.72864	-0.336633	22	164	Artery_Tibial:Brain_Amygdala:Brain_Anterior_cingulate_cortex_BA24:Brain_Caudate_basal_ganglia:Brain_Cortex:Brain_Nucleus_accumbens_basal_ganglia:Breast_Mammary_Tissue:Esophagus_Muscularis:Thyroid	5	Testis	rs12603589;rs12601921;rs12601919;rs12602556;rs62084208;rs62084210;rs12449312;rs7223643;rs1976052;rs7218014;rs7221651;rs12452511;rs1976054;rs7208909;rs2052187;rs11079706;rs11079707;rs80135947;rs6504542;rs8082512;rs1966410;rs58551145;rs6504543;rs8067892;rs8074078;rs8073510;rs12450363;rs62084212;rs2365466;rs2365468;rs62084213;rs7223930;rs7224923;rs8081856;rs62084234;rs7212293;rs78452260;rs4791048;rs…
LAMA2	1.18465e-24	0.0236552	10	0	NA	NA	NA	rs9398893;rs9388682;rs4523106;rs4897297;rs9372918;rs4897301;rs4419681;rs4538727;rs9402103;rs9402104
LIPT1	6.17017e-05	0.122693	0	2	Adipose_Subcutaneous:Adipose_Visceral_Omentum:Adrenal_Gland:Whole_Blood:Artery_Aorta:Artery_Tibial:Brain_Amygdala:Brain_Caudate_basal_ganglia:Brain_Cerebellar_Hemisphere:Breast_Mammary_Tissue:Colon_Sigmoid:Colon_Transverse:Esophagus_Gastroesophageal_Junction:Esophagus_Mucosa:Esophagus_Muscularis:Heart_Atrial_Appendage:Heart_Left_Ventricle:Lung:Muscle_Skeletal:Nerve_Tibial:Ovary:Pancreas:Pituitary…	NA	NA	rs4851210;rs17782474
LPHN3	0.999993	-1.22363	1	0	NA	NA	NA	rs12650391
LRFN5	0.712325	0.122069	0	1	Adipose_Subcutaneous:Artery_Aorta:Artery_Tibial:Brain_Cerebellar_Hemisphere:Brain_Cerebellum:Esophagus_Muscularis:Cells_Cultured_fibroblasts:Skin_Not_Sun_Exposed_Suprapubic:Skin_Sun_Exposed_Lower_leg:Spleen:Thyroid	NA	NA	rs11157240
LSAMP	0.946284	NA	51	49	Adrenal_Gland:Pancreas	NA	NA	rs7630428;rs62264956;rs62264957;rs55718530;rs62266061;rs56077465;rs56148567;rs62266064;rs62266065;rs55979908;rs62263076;rs56204450;rs62263082;rs73183041;rs56256549;rs56051552;rs62263112;rs56174517;rs59470461;rs55704727;rs62263115;rs62263116;rs6769144;rs62263119;rs62263121;rs62263122;rs62263123;rs62264762;rs73168378;rs62264763;rs56310214;rs62264766;rs6807173;rs6794831;rs73168388;rs7631320;rs557795…
LYG1	0.000104428	0.013563	0	2	Adipose_Subcutaneous:Adipose_Visceral_Omentum:Adrenal_Gland:Whole_Blood:Artery_Tibial:Brain_Cerebellar_Hemisphere:Brain_Cerebellum:Breast_Mammary_Tissue:Colon_Sigmoid:Colon_Transverse:Esophagus_Gastroesophageal_Junction:Esophagus_Mucosa:Esophagus_Muscularis:Heart_Atrial_Appendage:Heart_Left_Ventricle:Lung:Muscle_Skeletal:Nerve_Tibial:Pancreas:Pituitary:Prostate:Cells_Cultured_fibroblasts:Skin_Not…	1	Colon_Transverse:Muscle_Skeletal:Nerve_Tibial:Thyroid	rs4851210;rs17782474
MAPK3	0.409692	NA	0	2	Cells_EBV-transformed_lymphocytes:Whole_Blood:Esophagus_Muscularis:Lung:Muscle_Skeletal:Nerve_Tibial:Pancreas:Cells_Cultured_fibroblasts:Spleen:Thyroid	NA	NA	rs35105141;rs9939774
MAPKAP1	0.999737	-0.870989	0	3	Testis	NA	NA	rs360210;rs4838243;rs11789451;rs6478693;rs556629350;rs4837010;rs4837011;rs10986604;rs185062166;rs2807008
MAPKAPK3	2.71041e-06	0.0772686	0	49	Muscle_Skeletal	NA	NA	rs7617480;rs13091206;rs9811047;rs11720542;rs4955430;rs6774724;rs6790105;rs11130190;rs9842132;rs10155014;rs9861027;rs7648995;rs2140270;rs9757181;rs11715060;rs9817807;rs13096474;rs13061396;rs940045;rs7620024;rs8897;rs6446275;rs62259933;rs7619789;rs9654010;rs57273516;rs138084484;rs4855869;rs73073004;rs113741748;rs2329025;rs1106620;rs9860055;rs72934271;rs4855853;rs4855838;rs10865956;rs11130204;rs6797…
MAPRE3	0.799864	-0.767319	1	43	Adipose_Subcutaneous:Adipose_Visceral_Omentum:Adrenal_Gland:Whole_Blood:Artery_Aorta:Artery_Tibial:Esophagus_Gastroesophageal_Junction:Esophagus_Mucosa:Heart_Atrial_Appendage:Heart_Left_Ventricle:Muscle_Skeletal:Nerve_Tibial:Ovary:Cells_Cultured_fibroblasts:Skin_Not_Sun_Exposed_Suprapubic:Skin_Sun_Exposed_Lower_leg:Spleen:Testis	33	Brain_Cerebellum:Nerve_Tibial	rs7579579;rs6547317;rs7599286;rs2384511;rs6547318;rs3820821;rs4665929;rs3820822;rs4665363;rs920437;rs920435;rs12615423;rs1992311;rs7589627;rs6759548;rs6718978;rs3739085;rs3820823;rs3739086;rs6707735;rs3739088;rs3769135;rs3769136;rs3769137;rs11126784;rs7355650;rs11126857;rs2289360;rs6547413;rs6754371;rs2304681;rs3769139;rs10185736;rs1131375;rs1057394;rs2384572;rs11691465;rs13423359;rs1866559;rs758…
MDFIC	NA	-1.32194	0	3	Pancreas	NA	NA	rs6968125;rs62477308;rs2188541;rs62477310;rs62477311;rs10261857;rs62474669;rs62474673;rs10953781;rs62474676;rs6970620;rs12667221;rs62474683;rs56662562;rs10251192;rs59369558;rs1527743;rs17137753;rs9641538;rs1534373;rs12706031;rs7797141;rs10239094;rs62474713;rs2141233;rs4275159;rs1358394;rs10808179;rs4386905;rs12666306;rs1358393;rs34562882;rs73204027;rs73204028;rs11531592;rs73204031;rs1527737;rs115…
MEF2C	0.00424617	-2.66223	4	0	NA	NA	NA	rs254781;rs194225;rs639725;rs447801;rs454214;rs1081158;rs446219;rs185291;rs34316
MITD1	0.00170794	-0.172209	0	1	Adipose_Subcutaneous:Adipose_Visceral_Omentum:Whole_Blood:Artery_Aorta:Artery_Tibial:Brain_Frontal_Cortex_BA9:Brain_Hypothalamus:Breast_Mammary_Tissue:Esophagus_Gastroesophageal_Junction:Esophagus_Mucosa:Esophagus_Muscularis:Heart_Atrial_Appendage:Heart_Left_Ventricle:Muscle_Skeletal:Nerve_Tibial:Cells_Cultured_fibroblasts:Skin_Sun_Exposed_Lower_leg:Stomach	1	Adipose_Subcutaneous:Adipose_Visceral_Omentum:Adrenal_Gland:Artery_Aorta:Artery_Tibial:Brain_Cortex:Brain_Nucleus_accumbens_basal_ganglia:Cells_Cultured_fibroblasts:Colon_Sigmoid:Colon_Transverse:Esophagus_Mucosa:Esophagus_Muscularis:Heart_Atrial_Appendage:Heart_Left_Ventricle:Lung:Muscle_Skeletal:Nerve_Tibial:Pituitary:Skin_Not_Sun_Exposed_Suprapubic:Skin_Sun_Exposed_Lower_leg:Thyroid	rs4851210
MON1A	0.00636811	-0.629673	0	51	Thyroid	78	Colon_Transverse:Skin_Sun_Exposed_Lower_leg	rs7617480;rs13091206;rs9811047;rs11720542;rs4955430;rs6774724;rs6790105;rs11130190;rs9842132;rs10155014;rs9861027;rs7648995;rs2140270;rs9757181;rs11715060;rs9817807;rs13096474;rs13061396;rs940045;rs7620024;rs8897;rs6446275;rs62259933;rs7619789;rs9654010;rs57273516;rs138084484;rs4855869;rs73073004;rs113741748;rs2329025;rs1106620;rs9860055;rs72934271;rs4855853;rs4855838;rs10865956;rs11130204;rs6797…
MPV17	1.10287e-08	-0.205369	0	7	Skin_Not_Sun_Exposed_Suprapubic	NA	NA	rs7579579;rs6547317;rs7599286;rs2384511;rs6547318;rs3820821;rs4665929;rs3820822;rs4665363;rs920437;rs920435;rs12615423;rs1992311;rs7589627;rs6759548;rs6718978;rs3739085;rs3820823;rs3739086;rs6707735;rs3739088;rs3769135;rs3769136;rs3769137;rs11126784;rs7355650;rs11126857;rs2289360;rs6547413;rs6754371;rs2304681;rs3769139;rs10185736;rs1131375;rs1057394;rs2384572;rs11691465;rs13423359;rs1866559;rs758…
MRPL30	0.543252	-0.877134	0	1	Artery_Tibial:Pancreas:Pituitary:Prostate:Thyroid	NA	NA	rs4851210
MSRA	1.69976e-06	0.60153	0	3	Skin_Sun_Exposed_Lower_leg	NA	NA	rs11996727;rs6601534;rs10091386
MST1	1.72736e-10	0.158165	2	14	Adipose_Subcutaneous:Adipose_Visceral_Omentum:Artery_Aorta:Artery_Tibial:Brain_Cerebellum:Esophagus_Mucosa:Lung:Muscle_Skeletal:Nerve_Tibial:Prostate:Minor_Salivary_Gland:Cells_Cultured_fibroblasts:Skin_Not_Sun_Exposed_Suprapubic:Skin_Sun_Exposed_Lower_leg:Stomach:Thyroid	106	Adipose_Subcutaneous:Adipose_Visceral_Omentum:Adrenal_Gland:Artery_Aorta:Artery_Tibial:Brain_Cerebellum:Brain_Nucleus_accumbens_basal_ganglia:Breast_Mammary_Tissue:Cells_Cultured_fibroblasts:Colon_Sigmoid:Colon_Transverse:Esophagus_Gastroesophageal_Junction:Esophagus_Mucosa:Esophagus_Muscularis:Liver:Lung:Nerve_Tibial:Pancreas:Pituitary:Prostate:Skin_Not_Sun_Exposed_Suprapubic:Skin_Sun_Exposed_Lo…	rs7617480;rs13091206;rs9811047;rs11720542;rs4955430;rs6774724;rs6790105;rs11130190;rs9842132;rs10155014;rs9861027;rs7648995;rs2140270;rs9757181;rs11715060;rs9817807;rs13096474;rs13061396;rs940045;rs7620024;rs8897;rs6446275;rs62259933;rs7619789;rs9654010;rs57273516;rs138084484;rs4855869;rs73073004;rs113741748;rs2329025;rs1106620;rs9860055;rs72934271;rs4855853;rs4855838;rs10865956;rs11130204;rs6797…
MST1R	1.69349e-20	-0.377645	0	72	Adipose_Subcutaneous:Whole_Blood:Artery_Aorta:Brain_Cerebellar_Hemisphere:Brain_Cerebellum:Brain_Cortex:Brain_Hypothalamus:Heart_Atrial_Appendage:Lung:Muscle_Skeletal:Cells_Cultured_fibroblasts:Skin_Not_Sun_Exposed_Suprapubic:Thyroid	NA	NA	rs7617480;rs13091206;rs9811047;rs11720542;rs4955430;rs6774724;rs6790105;rs11130190;rs9842132;rs10155014;rs9861027;rs7648995;rs2140270;rs9757181;rs11715060;rs9817807;rs13096474;rs13061396;rs940045;rs7620024;rs8897;rs6446275;rs62259933;rs7619789;rs9654010;rs57273516;rs138084484;rs4855869;rs73073004;rs113741748;rs2329025;rs1106620;rs9860055;rs72934271;rs4855853;rs4855838;rs10865956;rs11130204;rs6797…
MTMR9	0.210866	1.57932	0	2	Colon_Sigmoid	NA	NA	rs11996727;rs6601534;rs10091386
NAT6	0.402945	-0.113189	0	68	Adipose_Subcutaneous:Colon_Transverse:Esophagus_Mucosa:Skin_Sun_Exposed_Lower_leg	13	Brain_Cortex:Esophagus_Mucosa:Skin_Sun_Exposed_Lower_leg	rs7617480;rs13091206;rs9811047;rs11720542;rs4955430;rs6774724;rs6790105;rs11130190;rs9842132;rs10155014;rs9861027;rs7648995;rs2140270;rs9757181;rs11715060;rs9817807;rs13096474;rs13061396;rs940045;rs7620024;rs8897;rs6446275;rs62259933;rs7619789;rs9654010;rs57273516;rs138084484;rs4855869;rs73073004;rs113741748;rs2329025;rs1106620;rs9860055;rs72934271;rs4855853;rs4855838;rs10865956;rs11130204;rs6797…
NCAM1	NA	NA	70	70	Artery_Tibial:Muscle_Skeletal:Cells_Cultured_fibroblasts:Skin_Not_Sun_Exposed_Suprapubic:Skin_Sun_Exposed_Lower_leg	NA	NA	rs4937872;rs10789929;rs7111153;rs7937151;rs2155281;rs7948789;rs7126748;rs7110863;rs2186709;rs2212449;rs1940729;rs1940728;rs2298526;rs1940727;rs1940726;rs1940725;rs1940724;rs1954826;rs4439550;rs10736463;rs6589353;rs7950836;rs1940720;rs1940718;rs1940716;rs7106434;rs4466874;rs4479020;rs7115165;rs7108081;rs4439551;rs4381397;rs4144892;rs1940702;rs10891487;rs1940701;rs723599;rs7127930;rs1940697;rs99196…
NCKIPSD	0.00713136	-0.551018	0	74	Adipose_Subcutaneous:Adipose_Visceral_Omentum:Adrenal_Gland:Whole_Blood:Artery_Aorta:Artery_Tibial:Brain_Amygdala:Brain_Anterior_cingulate_cortex_BA24:Brain_Caudate_basal_ganglia:Brain_Cerebellar_Hemisphere:Brain_Cerebellum:Brain_Cortex:Brain_Frontal_Cortex_BA9:Brain_Hippocampus:Brain_Hypothalamus:Brain_Nucleus_accumbens_basal_ganglia:Brain_Putamen_basal_ganglia:Brain_Spinal_cord_cervical_c-1:Bra…	NA	NA	rs7617480;rs13091206;rs9811047;rs11720542;rs4955430;rs6774724;rs6790105;rs11130190;rs9842132;rs10155014;rs9861027;rs7648995;rs2140270;rs9757181;rs11715060;rs9817807;rs13096474;rs13061396;rs940045;rs7620024;rs8897;rs6446275;rs62259933;rs7619789;rs9654010;rs57273516;rs138084484;rs4855869;rs73073004;rs113741748;rs2329025;rs1106620;rs9860055;rs72934271;rs4855853;rs4855838;rs10865956;rs11130204;rs6797…
NDUFAF3	4.85973e-05	-2.09007	0	62	Adipose_Subcutaneous:Artery_Aorta:Artery_Tibial:Esophagus_Gastroesophageal_Junction:Esophagus_Muscularis:Heart_Atrial_Appendage:Heart_Left_Ventricle:Lung:Muscle_Skeletal:Nerve_Tibial:Cells_Cultured_fibroblasts:Skin_Not_Sun_Exposed_Suprapubic:Thyroid:Vagina	34	Artery_Tibial	rs7617480;rs13091206;rs9811047;rs11720542;rs4955430;rs6774724;rs6790105;rs11130190;rs9842132;rs10155014;rs9861027;rs7648995;rs2140270;rs9757181;rs11715060;rs9817807;rs13096474;rs13061396;rs940045;rs7620024;rs8897;rs6446275;rs62259933;rs7619789;rs9654010;rs57273516;rs138084484;rs4855869;rs73073004;rs113741748;rs2329025;rs1106620;rs9860055;rs72934271;rs4855853;rs4855838;rs10865956;rs11130204;rs6797…
NEIL2	2.111e-09	2.68904	0	3	Artery_Tibial:Heart_Atrial_Appendage	NA	NA	rs11996727;rs6601534;rs10091386
NHEJ1	0.0271845	-0.493908	1	3	Whole_Blood:Artery_Aorta:Artery_Tibial:Colon_Sigmoid:Cells_Cultured_fibroblasts:Testis:Thyroid	3	Lung:Testis	rs13029742;rs6715064;rs7577690
NICN1	0.257246	-1.08729	6	106	Adipose_Subcutaneous:Adipose_Visceral_Omentum:Artery_Aorta:Artery_Coronary:Artery_Tibial:Brain_Caudate_basal_ganglia:Brain_Cerebellum:Brain_Cortex:Brain_Frontal_Cortex_BA9:Brain_Nucleus_accumbens_basal_ganglia:Breast_Mammary_Tissue:Colon_Sigmoid:Colon_Transverse:Esophagus_Gastroesophageal_Junction:Esophagus_Mucosa:Esophagus_Muscularis:Heart_Atrial_Appendage:Heart_Left_Ventricle:Lung:Muscle_Skelet…	50	Thyroid	rs7617480;rs13091206;rs9811047;rs11720542;rs4955430;rs6774724;rs6790105;rs11130190;rs9842132;rs10155014;rs9861027;rs7648995;rs2140270;rs9757181;rs11715060;rs9817807;rs13096474;rs13061396;rs940045;rs7620024;rs8897;rs6446275;rs62259933;rs7619789;rs9654010;rs57273516;rs138084484;rs4855869;rs73073004;rs113741748;rs2329025;rs1106620;rs9860055;rs72934271;rs4855853;rs4855838;rs10865956;rs11130204;rs6797…
NME6	9.21636e-05	-0.182941	0	1	Whole_Blood:Muscle_Skeletal:Cells_Cultured_fibroblasts:Skin_Sun_Exposed_Lower_leg	NA	NA	rs7617480;rs13091206;rs9811047;rs11720542;rs4955430;rs6774724;rs6790105;rs11130190;rs9842132;rs10155014;rs9861027;rs7648995;rs2140270;rs9757181;rs11715060;rs9817807;rs13096474;rs13061396;rs940045;rs7620024;rs8897;rs6446275;rs62259933;rs7619789;rs9654010;rs57273516;rs138084484;rs4855869;rs73073004;rs113741748;rs2329025;rs1106620;rs9860055;rs72934271;rs4855853;rs4855838;rs10865956;rs11130204;rs6797…
NPRL2	0.345175	-0.107064	0	2	Breast_Mammary_Tissue	NA	NA	rs11716948;rs80033912;rs7629936
OLFML2A	1.74427e-05	0.45172	0	4	Brain_Caudate_basal_ganglia:Brain_Putamen_basal_ganglia:Esophagus_Muscularis	NA	NA	rs360210;rs4838243;rs11789451;rs6478693;rs556629350;rs4837010;rs4837011;rs10986604;rs185062166;rs2807008
OST4	NA	NA	2	5	Cells_Cultured_fibroblasts	NA	NA	rs7579579;rs6547317;rs7599286;rs2384511;rs6547318;rs3820821;rs4665929;rs3820822;rs4665363;rs920437;rs920435;rs12615423;rs1992311;rs7589627;rs6759548;rs6718978;rs3739085;rs3820823;rs3739086;rs6707735;rs3739088;rs3769135;rs3769136;rs3769137;rs11126784;rs7355650;rs11126857;rs2289360;rs6547413;rs6754371;rs2304681;rs3769139;rs10185736;rs1131375;rs1057394;rs2384572;rs11691465;rs13423359;rs1866559;rs758…
P4HTM	0.0232749	NA	0	106	Adipose_Subcutaneous:Adipose_Visceral_Omentum:Adrenal_Gland:Whole_Blood:Artery_Aorta:Artery_Tibial:Brain_Caudate_basal_ganglia:Brain_Cerebellar_Hemisphere:Brain_Cerebellum:Brain_Cortex:Brain_Frontal_Cortex_BA9:Brain_Hippocampus:Brain_Hypothalamus:Brain_Nucleus_accumbens_basal_ganglia:Brain_Putamen_basal_ganglia:Brain_Spinal_cord_cervical_c-1:Breast_Mammary_Tissue:Colon_Sigmoid:Colon_Transverse:Es…	103	Colon_Transverse:Minor_Salivary_Gland:Nerve_Tibial:Pancreas:Prostate:Small_Intestine_Terminal_Ileum:Thyroid	rs7617480;rs13091206;rs9811047;rs11720542;rs4955430;rs6774724;rs6790105;rs11130190;rs9842132;rs10155014;rs9861027;rs7648995;rs2140270;rs9757181;rs11715060;rs9817807;rs13096474;rs13061396;rs940045;rs7620024;rs8897;rs6446275;rs62259933;rs7619789;rs9654010;rs57273516;rs138084484;rs4855869;rs73073004;rs113741748;rs2329025;rs1106620;rs9860055;rs72934271;rs4855853;rs4855838;rs10865956;rs11130204;rs6797…
PDE4B	0.709079	-0.830512	22	2	Stomach	NA	NA	rs4255357;rs2310754;rs7528604;rs11208774;rs11208775;rs3009872;rs6690101;rs7519259;rs2310819;rs2186120;rs2503185;rs7534143;rs1937450;rs1392817;rs884712;rs868321;rs57550775;rs7548408;rs7539350;rs6661750;rs10493396;rs72679121
PFKFB4	0.000321134	-0.13132	0	2	Skin_Not_Sun_Exposed_Suprapubic	NA	NA	rs11716948;rs80033912;rs7629936
PIGN	9.0206e-16	-0.038638	0	2	Skin_Sun_Exposed_Lower_leg	NA	NA	rs34950264;rs17069902
PINX1	4.94279e-09	-0.0639355	5	0	NA	3	Muscle_Skeletal:Testis	rs11996727;rs6601534;rs10091386
POFUT1	0.987586	-0.93358	0	2	Artery_Aorta	NA	NA	rs62204984;rs6058534;rs6121365
PPP4C	0.759586	-0.372627	0	1	Adipose_Subcutaneous	NA	NA	rs35105141;rs9939774
PPP6C	0.988609	-0.703512	6	6	Adipose_Subcutaneous:Adipose_Visceral_Omentum:Whole_Blood:Brain_Caudate_basal_ganglia:Brain_Frontal_Cortex_BA9:Brain_Hippocampus:Brain_Putamen_basal_ganglia:Colon_Transverse:Esophagus_Mucosa:Lung:Muscle_Skeletal:Nerve_Tibial:Cells_Cultured_fibroblasts:Skin_Not_Sun_Exposed_Suprapubic:Skin_Sun_Exposed_Lower_leg:Spleen:Stomach:Testis:Thyroid	6	Adipose_Subcutaneous:Artery_Tibial:Brain_Cerebellar_Hemisphere:Brain_Cerebellum:Brain_Cortex:Breast_Mammary_Tissue:Esophagus_Muscularis:Nerve_Tibial:Spleen:Thyroid	rs360210;rs4838243;rs11789451;rs6478693;rs556629350;rs4837010;rs4837011;rs10986604;rs185062166;rs2807008
PREB	0.00189836	-0.154459	1	0	NA	5	Liver:Muscle_Skeletal	rs7579579;rs6547317;rs7599286;rs2384511;rs6547318;rs3820821;rs4665929;rs3820822;rs4665363;rs920437;rs920435;rs12615423;rs1992311;rs7589627;rs6759548;rs6718978;rs3739085;rs3820823;rs3739086;rs6707735;rs3739088;rs3769135;rs3769136;rs3769137;rs11126784;rs7355650;rs11126857;rs2289360;rs6547413;rs6754371;rs2304681;rs3769139;rs10185736;rs1131375;rs1057394;rs2384572;rs11691465;rs13423359;rs1866559;rs758…
PRKAB2	0.767108	0.0523934	0	2	Whole_Blood:Muscle_Skeletal:Cells_Cultured_fibroblasts:Skin_Sun_Exposed_Lower_leg	NA	NA	rs12126629;rs10399871
PRKAR2A	0.983251	-2.8684	0	101	Adipose_Subcutaneous:Adipose_Visceral_Omentum:Artery_Tibial:Brain_Substantia_nigra:Colon_Sigmoid:Esophagus_Muscularis:Heart_Atrial_Appendage:Muscle_Skeletal:Nerve_Tibial	NA	NA	rs7617480;rs13091206;rs9811047;rs11720542;rs4955430;rs6774724;rs6790105;rs11130190;rs9842132;rs10155014;rs9861027;rs7648995;rs2140270;rs9757181;rs11715060;rs9817807;rs13096474;rs13061396;rs940045;rs7620024;rs8897;rs6446275;rs62259933;rs7619789;rs9654010;rs57273516;rs138084484;rs4855869;rs73073004;rs113741748;rs2329025;rs1106620;rs9860055;rs72934271;rs4855853;rs4855838;rs10865956;rs11130204;rs6797…
PTBP2	0.992693	-0.165757	28	61	Adipose_Subcutaneous:Adipose_Visceral_Omentum:Cells_EBV-transformed_lymphocytes:Artery_Aorta:Artery_Tibial:Brain_Cerebellum:Brain_Cortex:Brain_Nucleus_accumbens_basal_ganglia:Breast_Mammary_Tissue:Esophagus_Gastroesophageal_Junction:Esophagus_Mucosa:Heart_Atrial_Appendage:Lung:Muscle_Skeletal:Nerve_Tibial:Pancreas:Prostate:Cells_Cultured_fibroblasts:Skin_Not_Sun_Exposed_Suprapubic:Skin_Sun_Expose…	NA	NA	rs6673531;rs6698585;rs4950005;rs12565876;rs4576698;rs4320828;rs4950006;rs4950007;rs4950008;rs4314929;rs6683790;rs12750228;rs12752407;rs6683691;rs12567806;rs12083801;rs35647213;rs2088255;rs1339429;rs12027900;rs12071257;rs12097991;rs12022396;rs17524886;rs2021640;rs996315;rs11165702;rs7550465;rs7554256;rs7554259;rs6662721;rs6662347;rs1591868;rs3908925;rs2172980;rs7533165;rs56257350;rs4949941;rs37487…
PTPRN2	0.0165572	0.264797	1	0	NA	NA	NA	rs9638110
QRICH1	0.99607	-0.279294	0	106	Adipose_Subcutaneous:Adipose_Visceral_Omentum:Adrenal_Gland:Whole_Blood:Artery_Aorta:Artery_Coronary:Artery_Tibial:Brain_Caudate_basal_ganglia:Brain_Cerebellar_Hemisphere:Brain_Cerebellum:Brain_Cortex:Brain_Nucleus_accumbens_basal_ganglia:Breast_Mammary_Tissue:Colon_Sigmoid:Colon_Transverse:Esophagus_Gastroesophageal_Junction:Esophagus_Mucosa:Esophagus_Muscularis:Heart_Atrial_Appendage:Heart_Left…	101	Artery_Tibial:Skin_Not_Sun_Exposed_Suprapubic:Skin_Sun_Exposed_Lower_leg:Whole_Blood	rs7617480;rs13091206;rs9811047;rs11720542;rs4955430;rs6774724;rs6790105;rs11130190;rs9842132;rs10155014;rs9861027;rs7648995;rs2140270;rs9757181;rs11715060;rs9817807;rs13096474;rs13061396;rs940045;rs7620024;rs8897;rs6446275;rs62259933;rs7619789;rs9654010;rs57273516;rs138084484;rs4855869;rs73073004;rs113741748;rs2329025;rs1106620;rs9860055;rs72934271;rs4855853;rs4855838;rs10865956;rs11130204;rs6797…
RAB10	0.944405	-0.583905	0	6	Ovary:Testis	NA	NA	rs7579579;rs6547317;rs7599286;rs2384511;rs6547318;rs3820821;rs4665929;rs3820822;rs4665363;rs920437;rs920435;rs12615423;rs1992311;rs7589627;rs6759548;rs6718978;rs3739085;rs3820823;rs3739086;rs6707735;rs3739088;rs3769135;rs3769136;rs3769137;rs11126784;rs7355650;rs11126857;rs2289360;rs6547413;rs6754371;rs2304681;rs3769139;rs10185736;rs1131375;rs1057394;rs2384572;rs11691465;rs13423359;rs1866559;rs758…
RABEPK	4.19209e-06	0.131061	2	6	Adipose_Subcutaneous:Adipose_Visceral_Omentum:Adrenal_Gland:Cells_EBV-transformed_lymphocytes:Whole_Blood:Artery_Aorta:Artery_Tibial:Breast_Mammary_Tissue:Esophagus_Mucosa:Esophagus_Muscularis:Heart_Atrial_Appendage:Heart_Left_Ventricle:Lung:Muscle_Skeletal:Nerve_Tibial:Pituitary:Cells_Cultured_fibroblasts:Skin_Not_Sun_Exposed_Suprapubic:Skin_Sun_Exposed_Lower_leg:Thyroid	3	Adipose_Visceral_Omentum:Artery_Tibial:Cells_Cultured_fibroblasts:Esophagus_Mucosa:Esophagus_Muscularis	rs360210;rs4838243;rs11789451;rs6478693;rs556629350;rs4837010;rs4837011;rs10986604;rs185062166;rs2807008
RBM6	1	-0.685653	0	106	Adipose_Subcutaneous:Adipose_Visceral_Omentum:Whole_Blood:Artery_Aorta:Artery_Coronary:Artery_Tibial:Brain_Anterior_cingulate_cortex_BA24:Brain_Caudate_basal_ganglia:Brain_Cerebellar_Hemisphere:Brain_Cerebellum:Brain_Cortex:Brain_Frontal_Cortex_BA9:Brain_Hypothalamus:Brain_Nucleus_accumbens_basal_ganglia:Brain_Putamen_basal_ganglia:Breast_Mammary_Tissue:Colon_Sigmoid:Colon_Transverse:Esophagus_Ga…	68	Artery_Tibial:Lung:Nerve_Tibial	rs7617480;rs13091206;rs9811047;rs11720542;rs4955430;rs6774724;rs6790105;rs11130190;rs9842132;rs10155014;rs9861027;rs7648995;rs2140270;rs9757181;rs11715060;rs9817807;rs13096474;rs13061396;rs940045;rs7620024;rs8897;rs6446275;rs62259933;rs7619789;rs9654010;rs57273516;rs138084484;rs4855869;rs73073004;rs113741748;rs2329025;rs1106620;rs9860055;rs72934271;rs4855853;rs4855838;rs10865956;rs11130204;rs6797…
REV1	0.997024	NA	1	1	Whole_Blood:Esophagus_Mucosa:Pancreas:Cells_Cultured_fibroblasts:Skin_Not_Sun_Exposed_Suprapubic:Skin_Sun_Exposed_Lower_leg:Thyroid	NA	NA	rs4851210
RHOA	0.804698	-0.430263	16	103	Muscle_Skeletal:Nerve_Tibial	103	Adipose_Visceral_Omentum:Artery_Aorta:Artery_Coronary:Brain_Cerebellum:Breast_Mammary_Tissue:Colon_Transverse:Esophagus_Gastroesophageal_Junction:Esophagus_Muscularis:Heart_Atrial_Appendage:Heart_Left_Ventricle:Lung:Muscle_Skeletal:Nerve_Tibial:Pituitary:Skin_Not_Sun_Exposed_Suprapubic:Skin_Sun_Exposed_Lower_leg:Spleen:Stomach:Thyroid:Whole_Blood	rs7617480;rs13091206;rs9811047;rs11720542;rs4955430;rs6774724;rs6790105;rs11130190;rs9842132;rs10155014;rs9861027;rs7648995;rs2140270;rs9757181;rs11715060;rs9817807;rs13096474;rs13061396;rs940045;rs7620024;rs8897;rs6446275;rs62259933;rs7619789;rs9654010;rs57273516;rs138084484;rs4855869;rs73073004;rs113741748;rs2329025;rs1106620;rs9860055;rs72934271;rs4855853;rs4855838;rs10865956;rs11130204;rs6797…
RNF123	0.969715	-0.461991	6	105	Adipose_Subcutaneous:Adipose_Visceral_Omentum:Artery_Aorta:Artery_Coronary:Artery_Tibial:Brain_Anterior_cingulate_cortex_BA24:Brain_Cerebellar_Hemisphere:Brain_Cerebellum:Brain_Cortex:Brain_Nucleus_accumbens_basal_ganglia:Brain_Putamen_basal_ganglia:Breast_Mammary_Tissue:Colon_Sigmoid:Colon_Transverse:Esophagus_Gastroesophageal_Junction:Esophagus_Muscularis:Heart_Atrial_Appendage:Lung:Muscle_Skel…	106	Adipose_Subcutaneous:Adipose_Visceral_Omentum:Adrenal_Gland:Artery_Aorta:Artery_Tibial:Brain_Caudate_basal_ganglia:Brain_Cerebellum:Brain_Cortex:Brain_Frontal_Cortex_BA9:Brain_Nucleus_accumbens_basal_ganglia:Breast_Mammary_Tissue:Cells_Cultured_fibroblasts:Cells_EBV-transformed_lymphocytes:Colon_Sigmoid:Colon_Transverse:Esophagus_Gastroesophageal_Junction:Esophagus_Mucosa:Esophagus_Muscularis:Hea…	rs7617480;rs13091206;rs9811047;rs11720542;rs4955430;rs6774724;rs6790105;rs11130190;rs9842132;rs10155014;rs9861027;rs7648995;rs2140270;rs9757181;rs11715060;rs9817807;rs13096474;rs13061396;rs940045;rs7620024;rs8897;rs6446275;rs62259933;rs7619789;rs9654010;rs57273516;rs138084484;rs4855869;rs73073004;rs113741748;rs2329025;rs1106620;rs9860055;rs72934271;rs4855853;rs4855838;rs10865956;rs11130204;rs6797…
RP11-180C1.1	NA	NA	9	0	NA	NA	NA	rs1397439;rs1995911;rs1995910;rs4429724;rs10939211;rs1024120;rs986866;rs6448577;rs1510700;rs28869182;rs10000497;rs1797046;rs1510696
RP11-231C14.4	NA	NA	0	2	Adipose_Subcutaneous:Adipose_Visceral_Omentum:Artery_Tibial:Colon_Sigmoid:Colon_Transverse:Heart_Atrial_Appendage:Lung:Nerve_Tibial:Cells_Cultured_fibroblasts:Skin_Not_Sun_Exposed_Suprapubic:Skin_Sun_Exposed_Lower_leg:Spleen:Testis:Thyroid	NA	NA	rs35105141;rs9939774
RP11-3B7.1	NA	NA	0	106	Adipose_Subcutaneous:Adipose_Visceral_Omentum:Artery_Aorta:Artery_Coronary:Artery_Tibial:Brain_Anterior_cingulate_cortex_BA24:Colon_Sigmoid:Esophagus_Gastroesophageal_Junction:Esophagus_Muscularis:Heart_Atrial_Appendage:Heart_Left_Ventricle:Lung:Nerve_Tibial:Spleen	NA	NA	rs7617480;rs13091206;rs9811047;rs11720542;rs4955430;rs6774724;rs6790105;rs11130190;rs9842132;rs10155014;rs9861027;rs7648995;rs2140270;rs9757181;rs11715060;rs9817807;rs13096474;rs13061396;rs940045;rs7620024;rs8897;rs6446275;rs62259933;rs7619789;rs9654010;rs57273516;rs138084484;rs4855869;rs73073004;rs113741748;rs2329025;rs1106620;rs9860055;rs72934271;rs4855853;rs4855838;rs10865956;rs11130204;rs6797…
RP1L1	NA	1.24497	0	3	Adipose_Subcutaneous:Breast_Mammary_Tissue:Esophagus_Mucosa:Lung:Nerve_Tibial:Skin_Sun_Exposed_Lower_leg:Thyroid:Vagina	NA	NA	rs11996727;rs6601534;rs10091386
RPL35	0.527875	-0.226456	0	1	Cells_Cultured_fibroblasts	NA	NA	rs360210;rs4838243;rs11789451;rs6478693;rs556629350;rs4837010;rs4837011;rs10986604;rs185062166;rs2807008
SCAI	0.999445	NA	5	6	Adipose_Subcutaneous:Adipose_Visceral_Omentum:Adrenal_Gland:Artery_Aorta:Artery_Tibial:Brain_Hippocampus:Breast_Mammary_Tissue:Colon_Sigmoid:Colon_Transverse:Esophagus_Gastroesophageal_Junction:Esophagus_Muscularis:Heart_Atrial_Appendage:Muscle_Skeletal:Nerve_Tibial:Cells_Cultured_fibroblasts:Skin_Not_Sun_Exposed_Suprapubic:Skin_Sun_Exposed_Lower_leg:Thyroid	NA	NA	rs360210;rs4838243;rs11789451;rs6478693;rs556629350;rs4837010;rs4837011;rs10986604;rs185062166;rs2807008
SDC1	0.29047	-1.71741	5	5	Adrenal_Gland:Nerve_Tibial:Cells_Cultured_fibroblasts:Stomach:Thyroid	NA	NA	rs3771244;rs3771241;rs3771239;rs3771238;rs74346376
SEH1L	0.745892	NA	3	26	Brain_Cerebellar_Hemisphere:Lung:Cells_Cultured_fibroblasts	26	Nerve_Tibial	rs9748518;rs9748528;rs9748873;rs7243660;rs8097125;rs7234094;rs6505777;rs7226616;rs7237236;rs7234960;rs11080620;rs9964466;rs7241536;rs10221326;rs8097038;rs478006;rs1787008;rs556536;rs565832;rs472992;rs567031;rs692964;rs7243000;rs8086346;rs490853;rs1786263
SEMA3F	0.999918	NA	0	2	Heart_Atrial_Appendage	69	Adipose_Subcutaneous:Esophagus_Mucosa:Nerve_Tibial:Skin_Not_Sun_Exposed_Suprapubic:Skin_Sun_Exposed_Lower_leg:Thyroid	rs7617480;rs13091206;rs9811047;rs11720542;rs4955430;rs6774724;rs6790105;rs11130190;rs9842132;rs10155014;rs9861027;rs7648995;rs2140270;rs9757181;rs11715060;rs9817807;rs13096474;rs13061396;rs940045;rs7620024;rs8897;rs6446275;rs62259933;rs7619789;rs9654010;rs57273516;rs138084484;rs4855869;rs73073004;rs113741748;rs2329025;rs1106620;rs9860055;rs72934271;rs4855853;rs4855838;rs10865956;rs11130204;rs6797…
SEMA6D	0.99947	-0.259467	43	40	Nerve_Tibial:Cells_Cultured_fibroblasts	NA	NA	rs281264;rs35534970;rs281265;rs12910916;rs7174904;rs7175414;rs7174964;rs6493274;rs8040191;rs8040226;rs8041603;rs7166534;rs4485292;rs12904595;rs2132661;rs2132660;rs8032333;rs35473814;rs34794623;rs35175834;rs281286;rs8034190;rs8033799;rs12910487;rs281287;rs281289;rs281291;rs281293;rs4404005;rs12907546;rs4497626;rs4338738;rs4511474;rs1025142;rs34488670;rs281296;rs1025143;rs1025144;rs1025145;rs962949…
SEZ6L2	0.130153	0.0113468	0	2	Esophagus_Muscularis	NA	NA	rs35105141;rs9939774
SGCD	0.0023391	0.319696	4	4	Adrenal_Gland:Artery_Aorta:Artery_Tibial:Cells_Cultured_fibroblasts:Stomach:Thyroid	NA	NA	rs7718903;rs12163943;rs1504929;rs2135029
SHISA5	9.94272e-08	-0.44203	0	30	Muscle_Skeletal:Cells_Cultured_fibroblasts:Skin_Not_Sun_Exposed_Suprapubic:Skin_Sun_Exposed_Lower_leg	NA	NA	rs7617480;rs13091206;rs9811047;rs11720542;rs4955430;rs6774724;rs6790105;rs11130190;rs9842132;rs10155014;rs9861027;rs7648995;rs2140270;rs9757181;rs11715060;rs9817807;rs13096474;rs13061396;rs940045;rs7620024;rs8897;rs6446275;rs62259933;rs7619789;rs9654010;rs57273516;rs138084484;rs4855869;rs73073004;rs113741748;rs2329025;rs1106620;rs9860055;rs72934271;rs4855853;rs4855838;rs10865956;rs11130204;rs6797…
SIPA1L3	0.999677	-0.516624	0	6	Testis	NA	NA	rs17242235;rs12463321;rs12462716;rs4586564;rs12971925;rs1226598;rs8107507;rs1038084;rs4803216;rs7256747;rs8113076;rs10407657;rs7255283;rs7259566;rs1824796;rs2891683;rs1116234;rs2927744;rs8102916;rs2385119
SLC23A3	0.00231262	-0.265223	3	3	Adipose_Subcutaneous:Adipose_Visceral_Omentum:Whole_Blood:Artery_Aorta:Artery_Coronary:Artery_Tibial:Breast_Mammary_Tissue:Colon_Sigmoid:Esophagus_Gastroesophageal_Junction:Esophagus_Muscularis:Heart_Atrial_Appendage:Heart_Left_Ventricle:Lung:Muscle_Skeletal:Nerve_Tibial:Pancreas:Prostate:Cells_Cultured_fibroblasts:Skin_Not_Sun_Exposed_Suprapubic:Skin_Sun_Exposed_Lower_leg:Thyroid:Vagina	NA	NA	rs13029742;rs6715064;rs7577690
SLC26A6	3.31045e-05	-0.384056	0	2	Muscle_Skeletal:Thyroid	NA	NA	rs11716948;rs80033912;rs7629936
SLC35F6	0.0161308	-0.353051	0	33	Adipose_Subcutaneous:Nerve_Tibial:Skin_Not_Sun_Exposed_Suprapubic	NA	NA	rs7579579;rs6547317;rs7599286;rs2384511;rs6547318;rs3820821;rs4665929;rs3820822;rs4665363;rs920437;rs920435;rs12615423;rs1992311;rs7589627;rs6759548;rs6718978;rs3739085;rs3820823;rs3739086;rs6707735;rs3739088;rs3769135;rs3769136;rs3769137;rs11126784;rs7355650;rs11126857;rs2289360;rs6547413;rs6754371;rs2304681;rs3769139;rs10185736;rs1131375;rs1057394;rs2384572;rs11691465;rs13423359;rs1866559;rs758…
SLC4A1AP	7.73999e-07	-0.546764	0	36	Esophagus_Muscularis:Muscle_Skeletal	NA	NA	rs7579579;rs6547317;rs7599286;rs2384511;rs6547318;rs3820821;rs4665929;rs3820822;rs4665363;rs920437;rs920435;rs12615423;rs1992311;rs7589627;rs6759548;rs6718978;rs3739085;rs3820823;rs3739086;rs6707735;rs3739088;rs3769135;rs3769136;rs3769137;rs11126784;rs7355650;rs11126857;rs2289360;rs6547413;rs6754371;rs2304681;rs3769139;rs10185736;rs1131375;rs1057394;rs2384572;rs11691465;rs13423359;rs1866559;rs758…
SLMO1	1.94867e-07	NA	0	12	Breast_Mammary_Tissue	NA	NA	rs9748518;rs9748528;rs9748873;rs7243660;rs8097125;rs7234094;rs6505777;rs7226616;rs7237236;rs7234960;rs11080620;rs9964466;rs7241536;rs10221326;rs8097038;rs478006;rs1787008;rs556536;rs565832;rs472992;rs567031;rs692964;rs7243000;rs8086346;rs490853;rs1786263
SNX17	0.68618	-0.681943	0	1	Muscle_Skeletal	NA	NA	rs7579579;rs6547317;rs7599286;rs2384511;rs6547318;rs3820821;rs4665929;rs3820822;rs4665363;rs920437;rs920435;rs12615423;rs1992311;rs7589627;rs6759548;rs6718978;rs3739085;rs3820823;rs3739086;rs6707735;rs3739088;rs3769135;rs3769136;rs3769137;rs11126784;rs7355650;rs11126857;rs2289360;rs6547413;rs6754371;rs2304681;rs3769139;rs10185736;rs1131375;rs1057394;rs2384572;rs11691465;rs13423359;rs1866559;rs758…
SOX7	0.131242	0.63803	3	3	Adipose_Subcutaneous	NA	NA	rs11996727;rs6601534;rs10091386
TBX6	0.0291475	-0.69371	0	2	Adipose_Subcutaneous:Adipose_Visceral_Omentum:Cells_EBV-transformed_lymphocytes:Whole_Blood:Artery_Aorta:Artery_Coronary:Artery_Tibial:Brain_Caudate_basal_ganglia:Brain_Cortex:Breast_Mammary_Tissue:Colon_Sigmoid:Colon_Transverse:Esophagus_Gastroesophageal_Junction:Esophagus_Muscularis:Heart_Atrial_Appendage:Heart_Left_Ventricle:Lung:Muscle_Skeletal:Nerve_Tibial:Ovary:Cells_Cultured_fibroblasts:Sk…	NA	NA	rs35105141;rs9939774
TCF4	0.999867	0.443466	7	0	NA	NA	NA	rs613872;rs618869;rs596668;rs651350;rs652714;rs629376;rs611775;rs784218;rs784258;rs784257
TCTA	0.0132648	-0.595941	8	106	Adipose_Subcutaneous:Artery_Tibial:Colon_Sigmoid:Colon_Transverse:Esophagus_Gastroesophageal_Junction:Esophagus_Mucosa:Esophagus_Muscularis:Cells_Cultured_fibroblasts:Skin_Not_Sun_Exposed_Suprapubic:Skin_Sun_Exposed_Lower_leg:Spleen:Thyroid	NA	NA	rs7617480;rs13091206;rs9811047;rs11720542;rs4955430;rs6774724;rs6790105;rs11130190;rs9842132;rs10155014;rs9861027;rs7648995;rs2140270;rs9757181;rs11715060;rs9817807;rs13096474;rs13061396;rs940045;rs7620024;rs8897;rs6446275;rs62259933;rs7619789;rs9654010;rs57273516;rs138084484;rs4855869;rs73073004;rs113741748;rs2329025;rs1106620;rs9860055;rs72934271;rs4855853;rs4855838;rs10865956;rs11130204;rs6797…
TM9SF4	0.999971	-0.454322	3	3	Colon_Sigmoid:Esophagus_Mucosa:Esophagus_Muscularis:Nerve_Tibial:Cells_Cultured_fibroblasts:Skin_Sun_Exposed_Lower_leg	3	Adipose_Subcutaneous:Adipose_Visceral_Omentum:Artery_Tibial:Cells_Cultured_fibroblasts:Colon_Sigmoid:Colon_Transverse:Esophagus_Gastroesophageal_Junction:Esophagus_Mucosa:Esophagus_Muscularis:Muscle_Skeletal:Pancreas:Small_Intestine_Terminal_Ileum:Spleen:Stomach:Testis	rs62204984;rs6058534;rs6121365
TMA7	0.0100073	0.321268	0	25	Brain_Cerebellar_Hemisphere:Brain_Cerebellum:Brain_Cortex:Muscle_Skeletal:Skin_Sun_Exposed_Lower_leg:Testis	NA	NA	rs7617480;rs13091206;rs9811047;rs11720542;rs4955430;rs6774724;rs6790105;rs11130190;rs9842132;rs10155014;rs9861027;rs7648995;rs2140270;rs9757181;rs11715060;rs9817807;rs13096474;rs13061396;rs940045;rs7620024;rs8897;rs6446275;rs62259933;rs7619789;rs9654010;rs57273516;rs138084484;rs4855869;rs73073004;rs113741748;rs2329025;rs1106620;rs9860055;rs72934271;rs4855853;rs4855838;rs10865956;rs11130204;rs6797…
TMEM219	0.00103536	-0.146993	0	2	Lung:Cells_Cultured_fibroblasts	NA	NA	rs35105141;rs9939774
TMEM89	0.711076	-0.325142	0	3	Artery_Tibial	NA	NA	rs7617480;rs13091206;rs9811047;rs11720542;rs4955430;rs6774724;rs6790105;rs11130190;rs9842132;rs10155014;rs9861027;rs7648995;rs2140270;rs9757181;rs11715060;rs9817807;rs13096474;rs13061396;rs940045;rs7620024;rs8897;rs6446275;rs62259933;rs7619789;rs9654010;rs57273516;rs138084484;rs4855869;rs73073004;rs113741748;rs2329025;rs1106620;rs9860055;rs72934271;rs4855853;rs4855838;rs10865956;rs11130204;rs6797…
TNFRSF11A	0.879917	2.37876	2	0	NA	NA	NA	rs34950264;rs17069902
TRAIP	0.125104	-0.132255	7	99	Testis	3	Testis	rs7617480;rs13091206;rs9811047;rs11720542;rs4955430;rs6774724;rs6790105;rs11130190;rs9842132;rs10155014;rs9861027;rs7648995;rs2140270;rs9757181;rs11715060;rs9817807;rs13096474;rs13061396;rs940045;rs7620024;rs8897;rs6446275;rs62259933;rs7619789;rs9654010;rs57273516;rs138084484;rs4855869;rs73073004;rs113741748;rs2329025;rs1106620;rs9860055;rs72934271;rs4855853;rs4855838;rs10865956;rs11130204;rs6797…
TREX1	0.0933407	-0.110328	0	31	Adipose_Subcutaneous:Adipose_Visceral_Omentum:Whole_Blood:Artery_Aorta:Artery_Tibial:Brain_Caudate_basal_ganglia:Breast_Mammary_Tissue:Colon_Sigmoid:Colon_Transverse:Esophagus_Gastroesophageal_Junction:Esophagus_Mucosa:Esophagus_Muscularis:Heart_Atrial_Appendage:Heart_Left_Ventricle:Lung:Muscle_Skeletal:Nerve_Tibial:Pancreas:Prostate:Cells_Cultured_fibroblasts:Spleen:Thyroid	NA	NA	rs7617480;rs13091206;rs9811047;rs11720542;rs4955430;rs6774724;rs6790105;rs11130190;rs9842132;rs10155014;rs9861027;rs7648995;rs2140270;rs9757181;rs11715060;rs9817807;rs13096474;rs13061396;rs940045;rs7620024;rs8897;rs6446275;rs62259933;rs7619789;rs9654010;rs57273516;rs138084484;rs4855869;rs73073004;rs113741748;rs2329025;rs1106620;rs9860055;rs72934271;rs4855853;rs4855838;rs10865956;rs11130204;rs6797…
TSGA10	0.894353	0.321842	0	1	Adipose_Visceral_Omentum:Adrenal_Gland:Cells_EBV-transformed_lymphocytes:Whole_Blood:Artery_Tibial:Brain_Cerebellar_Hemisphere:Brain_Cerebellum:Brain_Cortex:Brain_Hypothalamus:Brain_Putamen_basal_ganglia:Breast_Mammary_Tissue:Colon_Transverse:Esophagus_Mucosa:Lung:Ovary:Pancreas:Pituitary:Prostate:Skin_Not_Sun_Exposed_Suprapubic:Skin_Sun_Exposed_Lower_leg:Small_Intestine_Terminal_Ileum:Spleen:Sto…	1	Skin_Sun_Exposed_Lower_leg:Testis:Thyroid	rs4851210
TTC12	1.44727e-07	-0.271528	26	86	Adipose_Subcutaneous:Adipose_Visceral_Omentum:Adrenal_Gland:Cells_EBV-transformed_lymphocytes:Whole_Blood:Artery_Aorta:Artery_Coronary:Artery_Tibial:Brain_Amygdala:Brain_Anterior_cingulate_cortex_BA24:Brain_Caudate_basal_ganglia:Brain_Cerebellar_Hemisphere:Brain_Cerebellum:Brain_Cortex:Brain_Frontal_Cortex_BA9:Brain_Hippocampus:Brain_Hypothalamus:Brain_Nucleus_accumbens_basal_ganglia:Brain_Putame…	87	Adipose_Subcutaneous:Adipose_Visceral_Omentum:Adrenal_Gland:Artery_Aorta:Artery_Coronary:Artery_Tibial:Brain_Caudate_basal_ganglia:Brain_Cerebellar_Hemisphere:Brain_Cerebellum:Brain_Cortex:Brain_Hypothalamus:Breast_Mammary_Tissue:Cells_Cultured_fibroblasts:Cells_EBV-transformed_lymphocytes:Colon_Sigmoid:Colon_Transverse:Esophagus_Gastroesophageal_Junction:Esophagus_Mucosa:Esophagus_Muscularis:Hea…	rs11214582;rs10891538;rs11214583;rs11493880;rs7939992;rs4438071;rs4370966;rs11214587;rs10789942;rs10891540;rs12804573;rs1078;rs2155463;rs2186799;rs2186800;rs11214589;rs754672;rs7116782;rs10891544;rs877137;rs11214594;rs11214595;rs17600713;rs34601878;rs12360992;rs35023999;rs34863235;rs7118900;rs10891547;rs10891548;rs11604671;rs2734849;rs10891549;rs1554929;rs11214603;rs6277;rs12363125;rs2734839;rs27…
TUSC2	0.703033	-0.593776	0	26	Nerve_Tibial	NA	NA	rs7617480;rs13091206;rs9811047;rs11720542;rs4955430;rs6774724;rs6790105;rs11130190;rs9842132;rs10155014;rs9861027;rs7648995;rs2140270;rs9757181;rs11715060;rs9817807;rs13096474;rs13061396;rs940045;rs7620024;rs8897;rs6446275;rs62259933;rs7619789;rs9654010;rs57273516;rs138084484;rs4855869;rs73073004;rs113741748;rs2329025;rs1106620;rs9860055;rs72934271;rs4855853;rs4855838;rs10865956;rs11130204;rs6797…
TXNDC9	0.22393	-0.642789	0	1	Testis	1	Colon_Transverse:Muscle_Skeletal:Nerve_Tibial:Thyroid	rs4851210
UBA7	2.68228e-14	-0.315381	5	105	Whole_Blood:Artery_Aorta:Artery_Tibial:Colon_Transverse:Esophagus_Mucosa:Esophagus_Muscularis:Lung:Muscle_Skeletal:Nerve_Tibial:Pancreas:Cells_Cultured_fibroblasts:Skin_Not_Sun_Exposed_Suprapubic:Skin_Sun_Exposed_Lower_leg:Small_Intestine_Terminal_Ileum:Spleen:Stomach	37	Lung:Skin_Not_Sun_Exposed_Suprapubic:Spleen	rs7617480;rs13091206;rs9811047;rs11720542;rs4955430;rs6774724;rs6790105;rs11130190;rs9842132;rs10155014;rs9861027;rs7648995;rs2140270;rs9757181;rs11715060;rs9817807;rs13096474;rs13061396;rs940045;rs7620024;rs8897;rs6446275;rs62259933;rs7619789;rs9654010;rs57273516;rs138084484;rs4855869;rs73073004;rs113741748;rs2329025;rs1106620;rs9860055;rs72934271;rs4855853;rs4855838;rs10865956;rs11130204;rs6797…
UGGT2	1.01866e-21	-0.0667801	0	38	Whole_Blood:Artery_Aorta:Artery_Tibial:Nerve_Tibial:Cells_Cultured_fibroblasts	38	Brain_Anterior_cingulate_cortex_BA24:Heart_Left_Ventricle:Nerve_Tibial:Pituitary:Thyroid	rs2389631;rs7981931;rs7337506;rs1925119;rs7981845;rs9556550;rs4771932;rs7323056;rs1925115;rs9556554;rs9556555;rs9554338;rs1010345;rs7991843;rs12871045;rs9554340;rs9556559;rs7996549;rs7320054;rs35092596;rs34818702;rs9556567;rs12866328;rs12871890;rs7982697;rs12583996;rs7328493;rs1475296;rs927710;rs1925107;rs9556575;rs9556576;rs61966957;rs1925104;rs9554349;rs1925100;rs1925099;rs7324569;rs7323705
USP4	6.20194e-07	NA	4	100	Artery_Aorta:Artery_Tibial:Brain_Cerebellum:Colon_Transverse:Heart_Atrial_Appendage:Muscle_Skeletal:Testis	105	Adipose_Subcutaneous:Adipose_Visceral_Omentum:Cells_EBV-transformed_lymphocytes:Heart_Atrial_Appendage:Heart_Left_Ventricle:Muscle_Skeletal:Skin_Not_Sun_Exposed_Suprapubic:Whole_Blood	rs7617480;rs13091206;rs9811047;rs11720542;rs4955430;rs6774724;rs6790105;rs11130190;rs9842132;rs10155014;rs9861027;rs7648995;rs2140270;rs9757181;rs11715060;rs9817807;rs13096474;rs13061396;rs940045;rs7620024;rs8897;rs6446275;rs62259933;rs7619789;rs9654010;rs57273516;rs138084484;rs4855869;rs73073004;rs113741748;rs2329025;rs1106620;rs9860055;rs72934271;rs4855853;rs4855838;rs10865956;rs11130204;rs6797…
WDR38	0.000345295	0.178961	0	6	Artery_Coronary:Esophagus_Gastroesophageal_Junction:Nerve_Tibial:Thyroid	NA	NA	rs360210;rs4838243;rs11789451;rs6478693;rs556629350;rs4837010;rs4837011;rs10986604;rs185062166;rs2807008
WDR6	9.19648e-07	-0.0589495	0	106	Adipose_Subcutaneous:Adipose_Visceral_Omentum:Whole_Blood:Artery_Aorta:Artery_Coronary:Artery_Tibial:Brain_Amygdala:Brain_Cerebellar_Hemisphere:Brain_Cerebellum:Brain_Hippocampus:Brain_Nucleus_accumbens_basal_ganglia:Brain_Putamen_basal_ganglia:Brain_Spinal_cord_cervical_c-1:Brain_Substantia_nigra:Breast_Mammary_Tissue:Colon_Sigmoid:Colon_Transverse:Esophagus_Gastroesophageal_Junction:Esophagus_M…	NA	NA	rs7617480;rs13091206;rs9811047;rs11720542;rs4955430;rs6774724;rs6790105;rs11130190;rs9842132;rs10155014;rs9861027;rs7648995;rs2140270;rs9757181;rs11715060;rs9817807;rs13096474;rs13061396;rs940045;rs7620024;rs8897;rs6446275;rs62259933;rs7619789;rs9654010;rs57273516;rs138084484;rs4855869;rs73073004;rs113741748;rs2329025;rs1106620;rs9860055;rs72934271;rs4855853;rs4855838;rs10865956;rs11130204;rs6797…
WDR87	NA	-0.135219	0	1	Skin_Not_Sun_Exposed_Suprapubic:Skin_Sun_Exposed_Lower_leg:Thyroid	NA	NA	rs1226598;rs8107507;rs1038084;rs4803216;rs7256747;rs8113076;rs10407657;rs7255283;rs7259566;rs1824796;rs2891683;rs2385119;rs1116234;rs2927744;rs8102916
XKR6	0.956777	0.199431	1	0	NA	NA	NA	rs4840536
YPEL3	0.122709	NA	0	2	Adipose_Subcutaneous:Adipose_Visceral_Omentum:Adrenal_Gland:Whole_Blood:Artery_Aorta:Artery_Coronary:Artery_Tibial:Brain_Caudate_basal_ganglia:Brain_Cerebellar_Hemisphere:Brain_Cerebellum:Brain_Cortex:Brain_Nucleus_accumbens_basal_ganglia:Brain_Spinal_cord_cervical_c-1:Breast_Mammary_Tissue:Colon_Sigmoid:Colon_Transverse:Esophagus_Gastroesophageal_Junction:Esophagus_Mucosa:Esophagus_Muscularis:He…	2	Cells_Cultured_fibroblasts:Testis	rs35105141;rs9939774
ZFAND2A	0.000389857	NA	0	1	Adipose_Subcutaneous:Whole_Blood:Colon_Sigmoid:Colon_Transverse:Esophagus_Mucosa:Esophagus_Muscularis:Heart_Left_Ventricle:Muscle_Skeletal:Pancreas:Cells_Cultured_fibroblasts:Skin_Not_Sun_Exposed_Suprapubic:Skin_Sun_Exposed_Lower_leg:Testis:Thyroid	1	Nerve_Tibial	rs3808352
ZFAND2B	0.00495151	NA	0	3	Adipose_Subcutaneous:Brain_Cerebellar_Hemisphere:Brain_Cerebellum:Lung:Nerve_Tibial	NA	NA	rs13029742;rs6715064;rs7577690
ZFP30	9.06361e-08	0.401011	7	20	Adipose_Subcutaneous:Adipose_Visceral_Omentum:Adrenal_Gland:Whole_Blood:Artery_Aorta:Artery_Tibial:Brain_Cerebellar_Hemisphere:Brain_Cerebellum:Colon_Sigmoid:Colon_Transverse:Esophagus_Mucosa:Esophagus_Muscularis:Lung:Nerve_Tibial:Cells_Cultured_fibroblasts:Skin_Not_Sun_Exposed_Suprapubic:Skin_Sun_Exposed_Lower_leg:Small_Intestine_Terminal_Ileum	14	Adipose_Subcutaneous:Adipose_Visceral_Omentum:Breast_Mammary_Tissue:Thyroid	rs17242235;rs12463321;rs12462716;rs4586564;rs12971925;rs1226598;rs8107507;rs1038084;rs4803216;rs7256747;rs8113076;rs10407657;rs7255283;rs7259566;rs1824796;rs2891683;rs2385119;rs1116234;rs2927744;rs8102916
ZNF146	0.811746	-1.50965	0	3	Thyroid	NA	NA	rs17242235;rs12463321;rs12462716;rs4586564;rs12971925;rs1226598;rs8107507;rs1038084;rs4803216;rs7256747;rs8113076;rs10407657;rs7255283;rs7259566;rs1824796;rs2891683;rs1116234;rs2927744;rs8102916
ZNF260	3.06605e-06	-0.371471	0	7	Artery_Tibial:Brain_Nucleus_accumbens_basal_ganglia:Breast_Mammary_Tissue:Esophagus_Mucosa:Cells_Cultured_fibroblasts:Skin_Not_Sun_Exposed_Suprapubic:Thyroid	NA	NA	rs17242235;rs12463321;rs12462716;rs4586564;rs12971925;rs1226598;rs8107507;rs1038084;rs4803216;rs7256747;rs8113076;rs10407657;rs7255283;rs7259566;rs1824796;rs2891683;rs2385119;rs1116234;rs2927744;rs8102916
ZNF345	2.3315e-11	-0.704688	0	2	Brain_Cerebellum	NA	NA	rs17242235;rs12463321;rs12462716;rs4586564;rs12971925;rs1226598;rs8107507;rs1038084;rs4803216;rs7256747;rs8113076;rs10407657;rs7255283;rs7259566;rs1824796;rs2891683;rs2385119;rs1116234;rs2927744;rs8102916
ZNF382	0.853323	-0.452881	0	5	Artery_Aorta:Nerve_Tibial	NA	NA	rs17242235;rs12463321;rs12462716;rs4586564;rs12971925;rs1226598;rs8107507;rs1038084;rs4803216;rs7256747;rs8113076;rs10407657;rs7255283;rs7259566;rs1824796;rs2891683;rs1116234;rs2927744;rs8102916
ZNF420	3.29013e-08	1.11207	0	1	Brain_Cerebellum	NA	NA	rs1226598;rs8107507;rs1038084;rs4803216;rs7256747;rs8113076;rs10407657;rs7255283;rs7259566;rs1824796;rs2891683;rs2385119;rs1116234;rs2927744;rs8102916
ZNF527	4.12488e-05	-0.474531	0	3	Adrenal_Gland	NA	NA	rs17242235;rs12463321;rs12462716;rs4586564;rs12971925;rs1226598;rs8107507;rs1038084;rs4803216;rs7256747;rs8113076;rs10407657;rs7255283;rs7259566;rs1824796;rs2891683;rs2385119;rs1116234;rs2927744;rs8102916
ZNF529	0.00106714	0.632376	0	3	Brain_Cerebellar_Hemisphere	NA	NA	rs17242235;rs12463321;rs12462716;rs4586564;rs12971925;rs1226598;rs8107507;rs1038084;rs4803216;rs7256747;rs8113076;rs10407657;rs7255283;rs7259566;rs1824796;rs2891683;rs1116234;rs2927744;rs8102916
ZNF540	0.00697653	-0.67063	7	0	NA	1	Testis	rs17242235;rs12463321;rs12462716;rs4586564;rs12971925;rs1226598;rs8107507;rs1038084;rs4803216;rs7256747;rs8113076;rs10407657;rs7255283;rs7259566;rs1824796;rs2891683;rs2385119;rs1116234;rs2927744;rs8102916
ZNF565	0.00176669	-0.0820383	0	3	Adipose_Subcutaneous	NA	NA	rs17242235;rs12463321;rs12462716;rs4586564;rs12971925;rs1226598;rs8107507;rs1038084;rs4803216;rs7256747;rs8113076;rs10407657;rs7255283;rs7259566;rs1824796;rs2891683;rs1116234;rs2927744;rs8102916
ZNF566	0.637364	-0.59994	0	7	Adipose_Subcutaneous:Brain_Cerebellar_Hemisphere:Esophagus_Muscularis:Lung:Nerve_Tibial:Skin_Not_Sun_Exposed_Suprapubic:Stomach:Testis:Thyroid	NA	NA	rs17242235;rs12463321;rs12462716;rs4586564;rs12971925;rs1226598;rs8107507;rs1038084;rs4803216;rs7256747;rs8113076;rs10407657;rs7255283;rs7259566;rs1824796;rs2891683;rs1116234;rs2927744;rs8102916;rs2385119
ZNF567	1.86507e-06	0.177191	0	5	Adipose_Visceral_Omentum:Artery_Aorta:Artery_Tibial:Esophagus_Mucosa:Muscle_Skeletal:Nerve_Tibial:Cells_Cultured_fibroblasts:Skin_Not_Sun_Exposed_Suprapubic:Skin_Sun_Exposed_Lower_leg:Thyroid	NA	NA	rs17242235;rs12463321;rs12462716;rs4586564;rs12971925;rs1226598;rs8107507;rs1038084;rs4803216;rs7256747;rs8113076;rs10407657;rs7255283;rs7259566;rs1824796;rs2891683;rs1116234;rs2927744;rs8102916
ZNF568	4.90823e-09	-0.408377	1	17	Esophagus_Gastroesophageal_Junction:Esophagus_Muscularis:Lung:Pancreas:Pituitary:Prostate:Cells_Cultured_fibroblasts:Skin_Sun_Exposed_Lower_leg:Spleen:Testis:Thyroid	20	Adipose_Visceral_Omentum:Adrenal_Gland:Artery_Aorta:Artery_Coronary:Artery_Tibial:Brain_Cerebellar_Hemisphere:Brain_Cerebellum:Brain_Frontal_Cortex_BA9:Brain_Hypothalamus:Breast_Mammary_Tissue:Cells_Cultured_fibroblasts:Colon_Sigmoid:Colon_Transverse:Esophagus_Gastroesophageal_Junction:Esophagus_Muscularis:Heart_Atrial_Appendage:Lung:Muscle_Skeletal:Nerve_Tibial:Ovary:Pituitary:Prostate:Skin_Not_…	rs17242235;rs12463321;rs12462716;rs4586564;rs12971925;rs1226598;rs8107507;rs1038084;rs4803216;rs7256747;rs8113076;rs10407657;rs7255283;rs7259566;rs1824796;rs2891683;rs1116234;rs2927744;rs8102916;rs2385119
ZNF571	2.82738e-09	-0.734602	5	20	Brain_Cerebellum:Esophagus_Mucosa:Lung:Pituitary:Skin_Not_Sun_Exposed_Suprapubic:Skin_Sun_Exposed_Lower_leg:Thyroid	NA	NA	rs17242235;rs12463321;rs12462716;rs4586564;rs12971925;rs1226598;rs8107507;rs1038084;rs4803216;rs7256747;rs8113076;rs10407657;rs7255283;rs7259566;rs1824796;rs2891683;rs2385119;rs1116234;rs2927744;rs8102916
ZNF573	9.43002e-09	0.174971	0	20	Adipose_Subcutaneous:Adipose_Visceral_Omentum:Adrenal_Gland:Artery_Tibial:Brain_Cerebellum:Esophagus_Mucosa:Heart_Atrial_Appendage:Heart_Left_Ventricle:Muscle_Skeletal:Nerve_Tibial:Cells_Cultured_fibroblasts:Testis:Thyroid	NA	NA	rs17242235;rs12463321;rs12462716;rs4586564;rs12971925;rs1226598;rs8107507;rs1038084;rs4803216;rs7256747;rs8113076;rs10407657;rs7255283;rs7259566;rs1824796;rs2891683;rs2385119;rs1116234;rs2927744;rs8102916
ZNF585A	0.711327	0.518767	1	17	Adipose_Subcutaneous:Artery_Tibial:Esophagus_Muscularis:Nerve_Tibial:Skin_Sun_Exposed_Lower_leg:Spleen	20	Adipose_Subcutaneous:Adipose_Visceral_Omentum:Adrenal_Gland:Artery_Aorta:Artery_Coronary:Artery_Tibial:Brain_Amygdala:Brain_Anterior_cingulate_cortex_BA24:Brain_Caudate_basal_ganglia:Brain_Cerebellar_Hemisphere:Brain_Cerebellum:Brain_Cortex:Brain_Frontal_Cortex_BA9:Brain_Hippocampus:Brain_Hypothalamus:Brain_Nucleus_accumbens_basal_ganglia:Brain_Putamen_basal_ganglia:Brain_Spinal_cord_cervical_c-1…	rs17242235;rs12463321;rs12462716;rs4586564;rs12971925;rs1226598;rs8107507;rs1038084;rs4803216;rs7256747;rs8113076;rs10407657;rs7255283;rs7259566;rs1824796;rs2891683;rs1116234;rs2927744;rs8102916;rs2385119
ZNF585B	0.00569167	-0.572054	1	20	Adipose_Subcutaneous:Adipose_Visceral_Omentum:Adrenal_Gland:Cells_EBV-transformed_lymphocytes:Artery_Aorta:Artery_Coronary:Artery_Tibial:Brain_Caudate_basal_ganglia:Brain_Cerebellar_Hemisphere:Brain_Cerebellum:Brain_Cortex:Brain_Frontal_Cortex_BA9:Brain_Nucleus_accumbens_basal_ganglia:Breast_Mammary_Tissue:Colon_Sigmoid:Colon_Transverse:Esophagus_Gastroesophageal_Junction:Esophagus_Mucosa:Esophag…	2	Artery_Aorta:Artery_Tibial:Brain_Cerebellum:Colon_Sigmoid:Esophagus_Gastroesophageal_Junction:Esophagus_Muscularis	rs17242235;rs12463321;rs12462716;rs4586564;rs12971925;rs1226598;rs8107507;rs1038084;rs4803216;rs7256747;rs8113076;rs10407657;rs7255283;rs7259566;rs1824796;rs2891683;rs1116234;rs2927744;rs8102916;rs2385119
ZNF589	6.50061e-07	-0.372176	0	2	Adipose_Subcutaneous:Whole_Blood:Artery_Tibial:Breast_Mammary_Tissue:Esophagus_Mucosa:Heart_Atrial_Appendage:Heart_Left_Ventricle:Nerve_Tibial:Skin_Not_Sun_Exposed_Suprapubic:Skin_Sun_Exposed_Lower_leg:Testis:Thyroid	1	Adipose_Subcutaneous:Lung:Skin_Sun_Exposed_Lower_leg	rs7617480;rs13091206;rs9811047;rs11720542;rs4955430;rs6774724;rs6790105;rs11130190;rs9842132;rs10155014;rs9861027;rs7648995;rs2140270;rs9757181;rs11715060;rs9817807;rs13096474;rs13061396;rs940045;rs7620024;rs8897;rs6446275;rs62259933;rs7619789;rs9654010;rs57273516;rs138084484;rs4855869;rs73073004;rs113741748;rs2329025;rs1106620;rs9860055;rs72934271;rs4855853;rs4855838;rs10865956;rs11130204;rs6797…
ZNF607	8.48062e-08	0.349141	0	20	Adipose_Subcutaneous:Adipose_Visceral_Omentum:Adrenal_Gland:Artery_Aorta:Artery_Tibial:Brain_Amygdala:Brain_Anterior_cingulate_cortex_BA24:Brain_Caudate_basal_ganglia:Brain_Cerebellar_Hemisphere:Brain_Cerebellum:Brain_Cortex:Brain_Frontal_Cortex_BA9:Brain_Hippocampus:Brain_Hypothalamus:Brain_Nucleus_accumbens_basal_ganglia:Brain_Putamen_basal_ganglia:Brain_Spinal_cord_cervical_c-1:Brain_Substanti…	NA	NA	rs17242235;rs12463321;rs12462716;rs4586564;rs12971925;rs1226598;rs8107507;rs1038084;rs4803216;rs7256747;rs8113076;rs10407657;rs7255283;rs7259566;rs1824796;rs2891683;rs2385119;rs1116234;rs2927744;rs8102916
ZNF771	0.295813	-1.29596	0	2	Artery_Tibial	NA	NA	rs35105141;rs9939774
ZNF781	7.22161e-06	-0.263307	1	20	Adipose_Subcutaneous:Adipose_Visceral_Omentum:Adrenal_Gland:Whole_Blood:Artery_Aorta:Artery_Tibial:Brain_Cortex:Brain_Hypothalamus:Breast_Mammary_Tissue:Colon_Transverse:Esophagus_Mucosa:Esophagus_Muscularis:Heart_Atrial_Appendage:Heart_Left_Ventricle:Lung:Muscle_Skeletal:Nerve_Tibial:Ovary:Pancreas:Pituitary:Cells_Cultured_fibroblasts:Skin_Not_Sun_Exposed_Suprapubic:Skin_Sun_Exposed_Lower_leg:Sm…	14	Adipose_Subcutaneous:Adipose_Visceral_Omentum:Breast_Mammary_Tissue:Testis:Thyroid	rs17242235;rs12463321;rs12462716;rs4586564;rs12971925;rs1226598;rs8107507;rs1038084;rs4803216;rs7256747;rs8113076;rs10407657;rs7255283;rs7259566;rs1824796;rs2891683;rs2385119;rs1116234;rs2927744;rs8102916
ZNF790	3.27624e-12	-0.593222	0	5	Lung	NA	NA	rs17242235;rs12463321;rs12462716;rs4586564;rs12971925;rs1226598;rs8107507;rs1038084;rs4803216;rs7256747;rs8113076;rs10407657;rs7255283;rs7259566;rs1824796;rs2891683;rs1116234;rs2927744;rs8102916
ZNF793	5.30991e-06	2.14229	2	3	Adipose_Subcutaneous:Brain_Cerebellar_Hemisphere:Brain_Cerebellum:Lung:Pituitary:Cells_Cultured_fibroblasts	3	Testis:Thyroid	rs17242235;rs12463321;rs12462716;rs4586564;rs12971925;rs1226598;rs8107507;rs1038084;rs4803216;rs7256747;rs8113076;rs10407657;rs7255283;rs7259566;rs1824796;rs2891683;rs2385119;rs1116234;rs2927744;rs8102916
ZNF829	1.84766e-08	-0.32869	0	5	Adipose_Visceral_Omentum	NA	NA	rs17242235;rs12463321;rs12462716;rs4586564;rs12971925;rs1226598;rs8107507;rs1038084;rs4803216;rs7256747;rs8113076;rs10407657;rs7255283;rs7259566;rs1824796;rs2891683;rs1116234;rs2927744;rs8102916
AC091729.9	NA	NA	0	NA	NA	1	Adipose_Subcutaneous:Adipose_Visceral_Omentum:Artery_Aorta:Brain_Cerebellum:Colon_Transverse:Esophagus_Mucosa:Esophagus_Muscularis:Heart_Atrial_Appendage:Heart_Left_Ventricle:Liver:Muscle_Skeletal:Skin_Not_Sun_Exposed_Suprapubic:Thyroid	rs3808352
AC145343.2	NA	NA	1	NA	NA	58	Testis	rs56148300;rs56404791;rs4271626;rs8071463;rs6504555;rs12449442;rs11867401;rs9907491;rs62086044;rs62086045;rs7210027;rs4791295;rs74564337;rs6504568;rs62086889;rs8081714;rs8182243;rs7406031;rs7406141;rs6504574;rs7211282;rs62084675;rs62084679;rs75236169;rs12752;rs7214869;rs7503834;rs6504576;rs62084693;rs8078543;rs4638;rs35594666;rs35453056;rs62084701;rs62084702;rs7405743;rs62084704;rs28592929;rs3890…
CTC-454I21.4	NA	NA	0	NA	NA	20	Testis	rs17242235;rs12463321;rs12462716;rs4586564;rs12971925;rs1226598;rs8107507;rs1038084;rs4803216;rs7256747;rs8113076;rs10407657;rs7255283;rs7259566;rs1824796;rs2891683;rs2385119;rs1116234;rs2927744;rs8102916
CTD-2330K9.2	NA	NA	0	NA	NA	1	Testis	rs7617480
GNAI2	NA	NA	0	NA	NA	1	Nerve_Tibial	rs7629936
IP6K2	NA	NA	0	NA	NA	35	Adipose_Subcutaneous:Adipose_Visceral_Omentum:Cells_Cultured_fibroblasts:Colon_Transverse:Esophagus_Mucosa:Esophagus_Muscularis:Lung:Nerve_Tibial:Skin_Not_Sun_Exposed_Suprapubic:Skin_Sun_Exposed_Lower_leg:Thyroid	rs13091206;rs6790105;rs13061396;rs9811047;rs11720542;rs4955430;rs11130190;rs9842132;rs10155014;rs9861027;rs7648995;rs2140270;rs11715060;rs9817807;rs13096474;rs940045;rs7620024;rs8897;rs6446275;rs62259933;rs7619789;rs9654010;rs57273516;rs138084484;rs4855869;rs113741748;rs2329025;rs1106620;rs9860055;rs72934271;rs4855853;rs4855838;rs10865956;rs11130204;rs7617480
KCTD13	NA	NA	0	NA	NA	2	Lung:Skin_Sun_Exposed_Lower_leg:Thyroid	rs35105141;rs9939774
LAPTM4A	NA	NA	0	NA	NA	5	Adipose_Subcutaneous:Skin_Sun_Exposed_Lower_leg	rs3771244;rs3771241;rs3771239;rs3771238;rs74346376
LINC00665	NA	NA	0	NA	NA	2	Testis	rs1226598;rs8107507
LINC00674	NA	NA	0	NA	NA	101	Heart_Atrial_Appendage:Heart_Left_Ventricle:Pancreas	rs62086889;rs4791295;rs74564337;rs6504568;rs8081714;rs8182243;rs7406031;rs6504574;rs7211282;rs62084675;rs62084679;rs75236169;rs12752;rs7214869;rs7503834;rs6504576;rs62084693;rs8078543;rs4638;rs35594666;rs35453056;rs62084701;rs62084702;rs7405743;rs62084704;rs3890640;rs6504578;rs28850355;rs79415988;rs9330556;rs62084742;rs34937122;rs62084747;rs62084748;rs62084750;rs12943289;rs62084759;rs12449312;rs7…
LINC01360	NA	NA	0	NA	NA	16	Testis	rs4650200;rs4649981;rs11210176;rs6424535;rs11210182;rs10789363;rs7533366;rs6697023;rs6675954;rs6684541;rs11210186;rs11210187;rs4650206;rs12754690;rs11210261;rs11210263
LINC01535	NA	NA	22	NA	NA	18	Artery_Tibial:Brain_Amygdala:Brain_Anterior_cingulate_cortex_BA24:Brain_Caudate_basal_ganglia:Brain_Cerebellar_Hemisphere:Brain_Cerebellum:Brain_Cortex:Brain_Frontal_Cortex_BA9:Brain_Hippocampus:Brain_Hypothalamus:Brain_Nucleus_accumbens_basal_ganglia:Brain_Putamen_basal_ganglia:Brain_Spinal_cord_cervical_c-1:Brain_Substantia_nigra:Colon_Sigmoid:Esophagus_Gastroesophageal_Junction:Esophagus_Muscu…	rs1226598;rs8107507;rs2385119;rs1038084;rs4803216;rs7256747;rs8113076;rs10407657;rs7255283;rs7259566;rs1824796;rs2891683;rs1116234;rs2927744;rs4586564;rs8102916;rs17242235;rs12971925
MVP	NA	NA	0	NA	NA	2	Cells_Cultured_fibroblasts:Whole_Blood	rs35105141;rs9939774
PLXNB1	NA	NA	0	NA	NA	2	Artery_Tibial:Thyroid	rs7617480;rs13091206
RP11-177H2.2	NA	NA	0	NA	NA	3	Testis	rs11996727;rs6601534;rs10091386
SEMA3B-AS1	NA	NA	0	NA	NA	6	Breast_Mammary_Tissue	rs4855882;rs11720705;rs6804970;rs62262730;rs9870755;rs7613603
TAOK2	NA	NA	0	NA	NA	2	Testis	rs35105141;rs9939774
TDH	NA	NA	0	NA	NA	3	Testis:Thyroid	rs11996727;rs6601534;rs10091386
U73166.2	NA	NA	0	NA	NA	2	Testis	rs11716948;rs80033912
ZNF570	NA	NA	0	NA	NA	3	Lung:Thyroid	rs17242235;rs1226598;rs8107507
ZNF571-AS1	NA	NA	0	NA	NA	1	Testis	rs2385119
a. pLI: probability of loss-of-function mutation intolerance; high score=highprobability b. ncRVIS: non-coding residual variation intolerance score; high score= greater intolerance to non-coding variants c. The number of SNPs mapped to this gene via positional mapping d. The number of SNPs mapped to this gene via eQTLs e. The tissue horboring the significant eQTL associations f. The number of SNP…

## Sheet: Table S8
Supplementary Table 8. Genes mapped by candidate SNPs shared between multidimensional pain and suicide death (conjFDR < 0.05)
Genes	pLIa	ncRVISb	posMapSNPsc	eqtlMapSNPsd	eqtlMaptse	sqtlMapSNPsf	sqtlMaptsg	IndSigSNPsh
ACTN1	0.999931	NA	0	14	Artery_Tibial:Testis:Thyroid	NA	NA	rs12890560;rs11625374;rs11158798;rs12889849;rs7148045;rs12434764;rs3211166;rs12431706;rs2139541;rs8008082;rs12433349;rs12436823;rs12881742;rs12433032;rs8011772;rs10498529;rs112178501;rs2185494;rs12435957;rs10459533;rs10459534;rs199652245;rs12432470;rs17106899;rs12437400;rs1563295
ASXL3	0.999977	-1.64461	3	5	Colon_Transverse	NA	NA	rs1493924;rs4392137;rs12963024;rs11877423;rs9954214;rs12963804;rs11873871;rs11874521;rs1493917;rs7227708;rs6507070;rs6507071;rs12607190;rs9965563;rs12967889;rs9953948;rs34146745;rs34888443;rs8098328;rs8098255;rs3744888;rs8086041;rs2976;rs4427879;rs7243220;rs7228309;rs8090097;rs10460050;rs8085761;rs8085989;rs1026257;rs2220810;rs17747003;rs1493912;rs34724817;rs4638656;rs7239283;rs12455290;rs3491037…
CCDC178	4.11143e-29	-0.366634	0	2	Testis	NA	NA	rs1493924;rs4392137;rs12963024;rs11877423;rs9954214;rs12963804;rs11873871;rs11874521;rs1493917;rs7227708;rs6507070;rs6507071;rs12607190;rs7239283;rs12455290;rs9965563;rs12967889;rs9953948;rs34146745;rs34888443;rs34910379;rs4239383;rs8098328;rs8098255;rs3744888;rs8086041;rs2976;rs4427879;rs8091918;rs4997493;rs7243220;rs9945976;rs1027332;rs2172626;rs9949631;rs2123333;rs1452649;rs1452648;rs1493908;r…
ERH	0.84606	-0.754299	0	1	Skin_Sun_Exposed_Lower_leg	NA	NA	rs8008082;rs12433349;rs12436823;rs12881742;rs12433032;rs8011772;rs10498529;rs112178501;rs2185494;rs12435957;rs10459533;rs10459534;rs199652245;rs12432470;rs17106899;rs12437400;rs1563295
EXD2	1.11026e-08	-0.961556	8	8	Artery_Tibial:Skin_Sun_Exposed_Lower_leg:Testis	NA	NA	rs12890560;rs11625374;rs11158798;rs12889849;rs7148045;rs12434764;rs3211166;rs12431706;rs2139541;rs8008082;rs12433349;rs12436823;rs12881742;rs12433032;rs8011772;rs10498529;rs112178501;rs2185494;rs12435957;rs10459533;rs10459534;rs199652245;rs12432470;rs17106899;rs12437400;rs1563295
FOXP2	0.996179	-0.404517	4	1	Pituitary	NA	NA	rs10226011;rs7785799;rs11505922;rs7783870
GALNT16	0.0168277	NA	19	9	Heart_Atrial_Appendage	NA	NA	rs12890560;rs11625374;rs11158798;rs12889849;rs7148045;rs12434764;rs3211166;rs12431706;rs2139541;rs8008082;rs12433349;rs12436823;rs12881742;rs12433032;rs8011772;rs10498529;rs112178501;rs2185494;rs12435957;rs10459533;rs10459534;rs199652245;rs12432470;rs17106899;rs12437400;rs1563295
GATAD2A	0.995363	-0.496926	0	14	Whole_Blood:Esophagus_Mucosa:Cells_Cultured_fibroblasts:Skin_Not_Sun_Exposed_Suprapubic:Skin_Sun_Exposed_Lower_leg	NA	NA	rs12976025;rs10402661;rs4808194;rs11085259;rs757000;rs757001;rs2301668;rs968525;rs10421505;rs12982276;rs11085261;rs9304960;rs2301671;rs10403731
GNAQ	0.98439	-0.730215	1	1	Brain_Anterior_cingulate_cortex_BA24:Brain_Cerebellar_Hemisphere:Brain_Cerebellum:Brain_Cortex:Brain_Hippocampus	NA	NA	rs4582625
HAPLN4	0.0326848	0.204998	0	15	Adipose_Subcutaneous:Heart_Atrial_Appendage:Nerve_Tibial:Thyroid	NA	NA	rs12976025;rs10402661;rs4808194;rs11085259;rs757000;rs757001;rs2301668;rs968525;rs10421505;rs12982276;rs11085261;rs9304960;rs2301671;rs10403731;rs74182638;rs35824797
LPAR2	0.33727	-0.426143	0	1	Whole_Blood	NA	NA	rs74182638;rs35824797;rs4808948
MAU2	0.999718	0.0144236	29	17	Whole_Blood:Brain_Caudate_basal_ganglia:Brain_Cerebellum:Brain_Hippocampus:Muscle_Skeletal:Nerve_Tibial:Pituitary:Cells_Cultured_fibroblasts:Skin_Sun_Exposed_Lower_leg	14	Adipose_Subcutaneous:Artery_Tibial:Esophagus_Mucosa:Muscle_Skeletal:Nerve_Tibial:Skin_Sun_Exposed_Lower_leg:Testis:Whole_Blood	rs12976025;rs10402661;rs4808194;rs11085259;rs757000;rs757001;rs2301668;rs968525;rs10421505;rs12982276;rs11085261;rs9304960;rs2301671;rs10403731;rs74182638;rs35824797;rs4808948
MEF2BNB	NA	0.579437	0	7	Esophagus_Muscularis	NA	NA	rs12976025;rs10402661;rs4808194;rs11085259;rs757000;rs757001;rs2301668;rs968525;rs10421505;rs12982276;rs11085261;rs9304960;rs2301671;rs10403731
NOL4	0.998788	-1.08546	1	0	NA	NA	NA	rs1493924;rs4392137;rs12963024;rs11877423;rs9954214;rs12963804;rs11873871;rs11874521;rs1493917;rs7227708;rs6507070;rs6507071;rs12607190;rs9965563;rs12967889;rs9953948;rs34146745;rs34888443;rs8098328;rs8098255;rs3744888;rs8086041;rs2976;rs4427879;rs8091918;rs4997493;rs7243220;rs9945976;rs1027332;rs2172626;rs9949631;rs2123333;rs1452649;rs1452648;rs1493908;rs7228309;rs8088362;rs8090097;rs10460050;rs…
NR2C2AP	0.527168	-0.417894	0	7	Nerve_Tibial	NA	NA	rs12976025;rs10402661;rs4808194;rs11085259;rs757000;rs757001;rs2301668;rs968525;rs10421505;rs12982276;rs11085261;rs9304960;rs2301671;rs10403731
PBX4	0.00677213	-0.679897	0	1	Whole_Blood	NA	NA	rs74182638;rs35824797;rs4808948
PLXNA2	0.993981	0.644433	1	13	Artery_Aorta	NA	NA	rs12135577;rs12140101;rs11119024;rs11119025;rs11119026;rs11119027;rs12730749;rs12731099;rs6540460;rs6540461;rs6540462;rs6540463;rs11119028;rs1074404;rs12760062
PSAT1	2.11054e-09	-0.265016	0	1	Esophagus_Muscularis	NA	NA	rs4582625
RFXANK	0.000671164	0.789997	0	7	Whole_Blood	14	Adipose_Subcutaneous:Adipose_Visceral_Omentum:Artery_Aorta:Artery_Tibial:Esophagus_Mucosa:Muscle_Skeletal:Nerve_Tibial:Skin_Not_Sun_Exposed_Suprapubic:Skin_Sun_Exposed_Lower_leg:Thyroid:Whole_Blood	rs12976025;rs10402661;rs4808194;rs11085259;rs757000;rs757001;rs2301668;rs968525;rs10421505;rs12982276;rs11085261;rs9304960;rs2301671;rs10403731
SLC39A9	0.529199	-1.06	0	2	Skin_Sun_Exposed_Lower_leg	NA	NA	rs8008082;rs12433349;rs12436823;rs12881742;rs12433032;rs8011772;rs10498529;rs112178501;rs2185494;rs12435957;rs10459533;rs10459534;rs199652245;rs12432470;rs17106899;rs12437400;rs1563295
SUGP1	0.999636	NA	3	0	NA	1	Lung	rs12976025;rs10402661;rs4808194;rs11085259;rs757000;rs757001;rs2301668;rs968525;rs10421505;rs12982276;rs11085261;rs9304960;rs2301671;rs10403731;rs35824797
TM6SF2	1.93541e-05	NA	0	17	Adipose_Subcutaneous:Adipose_Visceral_Omentum:Brain_Cerebellum:Breast_Mammary_Tissue:Heart_Atrial_Appendage:Heart_Left_Ventricle:Lung:Nerve_Tibial:Cells_Cultured_fibroblasts:Skin_Not_Sun_Exposed_Suprapubic:Skin_Sun_Exposed_Lower_leg:Thyroid	NA	NA	rs12976025;rs10402661;rs4808194;rs11085259;rs757000;rs757001;rs2301668;rs968525;rs10421505;rs12982276;rs11085261;rs9304960;rs2301671;rs10403731;rs74182638;rs35824797;rs4808948
YJEFN3	2.63543e-06	NA	0	10	Adipose_Visceral_Omentum:Artery_Tibial:Brain_Cerebellum:Esophagus_Gastroesophageal_Junction:Esophagus_Mucosa:Esophagus_Muscularis:Muscle_Skeletal:Nerve_Tibial:Skin_Sun_Exposed_Lower_leg:Thyroid	17	Brain_Caudate_basal_ganglia:Brain_Cerebellar_Hemisphere:Brain_Cerebellum:Brain_Cortex:Brain_Frontal_Cortex_BA9:Brain_Hippocampus:Brain_Putamen_basal_ganglia:Liver:Nerve_Tibial:Ovary:Pituitary:Prostate:Spleen:Testis:Thyroid	rs74182638;rs35824797;rs4808948;rs12976025;rs10402661;rs4808194;rs11085259;rs757000;rs757001;rs2301668;rs968525;rs10421505;rs12982276;rs11085261;rs9304960;rs2301671;rs10403731
ZNF506	1.99613e-08	-0.2984	0	1	Prostate	NA	NA	rs74182638;rs35824797;rs4808948
BORCS8	NA	NA	0	NA	NA	14	Nerve_Tibial:Skin_Not_Sun_Exposed_Suprapubic:Skin_Sun_Exposed_Lower_leg:Thyroid:Whole_Blood	rs12976025;rs4808194;rs11085259;rs757000;rs757001;rs2301668;rs10421505;rs12982276;rs9304960;rs10402661;rs968525;rs11085261;rs2301671;rs10403731
DCAF5	NA	NA	0	NA	NA	25	Cells_Cultured_fibroblasts:Esophagus_Mucosa:Lung:Skin_Sun_Exposed_Lower_leg	rs12890560;rs11625374;rs11158798;rs12889849;rs7148045;rs12434764;rs3211166;rs12431706;rs2139541;rs8008082;rs12433349;rs12436823;rs12881742;rs12433032;rs8011772;rs10498529;rs112178501;rs2185494;rs12435957;rs10459533;rs10459534;rs12432470;rs17106899;rs12437400;rs1563295
MEF2B	NA	NA	0	NA	NA	14	Nerve_Tibial:Skin_Not_Sun_Exposed_Suprapubic:Skin_Sun_Exposed_Lower_leg:Thyroid:Whole_Blood	rs12976025;rs4808194;rs11085259;rs757000;rs757001;rs2301668;rs10421505;rs12982276;rs9304960;rs10402661;rs968525;rs11085261;rs2301671;rs10403731
a. pLI: probability of loss-of-function mutation intolerance; high score=highprobability b. ncRVIS: non-coding residual variation intolerance score; high score= greater intolerance to non-coding variants c. The number of SNPs mapped to this gene via positional mapping d. The number of SNPs mapped to this gene via eQTLs e. The tissue horboring the significant eQTL associations f. The number of SNP…

## Sheet: Table S9
Supplementary Table 9. Enrichment of GO with genes mapped by the candiate SNPs shared between multidimensional pain and suicide attempt
Term ida	Term description	Sourcesb	q-value
GO:0003700	DNA-binding transcription factor activity	MF	0.000854811
GO:0044212	Transcription regulatory region DNA binding	MF	0.00294949
GO:0003690	Double-stranded DNA binding	MF	0.00294949
GO:0044283	Small molecule biosynthetic process	BP	0.00321322
GO:0098978	Glutamatergic synapse	CC	0.00656065
GO:0098982	GABA-ergic synapse	CC	0.00711057
GO:0044281	Small molecule metabolic process	BP	0.00877842
GO:0043565	Sequence-specific DNA binding	MF	0.00988116
GO:0001067	Regulatory region nucleic acid binding	MF	0.0101438
GO:0043169	Cation binding	MF	0.0107304
GO:0000981	DNA-binding transcription factor activity, RNA polymerase II-specific	MF	0.0107304
GO:0030496	Midbody	CC	0.0110376
GO:0046872	Metal ion binding	MF	0.0116254
GO:0003677	DNA binding	MF	0.0154824
GO:0030284	Estrogen receptor activity	MF	0.0154824
GO:0098882	Structural constituent of presynaptic active zone	MF	0.0154824
GO:0008172	S-methyltransferase activity	MF	0.019484
GO:0000828	Inositol hexakisphosphate kinase activity	MF	0.0206394
GO:0030215	Semaphorin receptor binding	MF	0.0207807
GO:0006793	Phosphorus metabolic process	BP	0.021202
GO:0001505	Regulation of neurotransmitter levels	BP	0.021202
GO:0034404	Nucleobase-containing small molecule biosynthetic process	BP	0.0215985
GO:0019901	Protein kinase binding	MF	0.0249091
GO:0050803	Regulation of synapse structure or activity	BP	0.031508
GO:0099181	Structural constituent of presynapse	MF	0.0341674
GO:0008360	Regulation of cell shape	BP	0.0350013
GO:1901700	Response to oxygen-containing compound	BP	0.0350013
GO:0050808	Synapse organization	BP	0.0350013
GO:0099569	Presynaptic cytoskeleton	CC	0.0357652
GO:0019898	Extrinsic component of membrane	CC	0.0424607
GO:0008021	Synaptic vesicle	CC	0.0424607
GO:0061351	Neural precursor cell proliferation	BP	0.0484303
a. Gene ontology term id b. BP: biological process; MF: molecular function, CC: cellcular component

## Sheet: Table S10
Supplementary Table 10. Enrichment of canonical pathways with genes mapped by the candiate SNPs shared between multidimensional pain and suicide attempt
Term ida	Term description	Sourcesb	q-value
path:hsa05168	Herpes simplex virus 1 infection	KEGG	0.000485163
R-HSA-212436	Generic Transcription Pathway	Reactome	0.012537
path:hsa04360	Axon guidance	KEGG	0.0135544
R-HSA-8852405	Signaling by MST1	Reactome	0.0136746
R-HSA-389661	Glyoxylate metabolism and glycine degradation	Reactome	0.0158071
path:hsa00051	Fructose and mannose metabolism	KEGG	0.0158071
R-HSA-73857	RNA Polymerase II Transcription	Reactome	0.0164757
R-HSA-1855191	Synthesis of IPs in the nucleus	Reactome	0.0200572
R-HSA-373755	Semaphorin interactions	Reactome	0.0221427
path:hsa00260	Glycine, serine and threonine metabolism	KEGG	0.0239744
R-HSA-74160	Gene expression (Transcription)	Reactome	0.0255711
R-HSA-6798163	Choline catabolism	Reactome	0.0344069
R-HSA-2024101	CS/DS degradation	Reactome	0.0384697
R-HSA-416550	Sema4D mediated inhibition of cell attachment and migration	Reactome	0.0443978
a. Pathway term id b. Sources of pathway database

[truncated: 5 more sheets: Table S11, Table S12, Table S13, Table S14, Table S15]
